# Supplementary material for: A DFT study on NHC-catalyzed intramolecular aldehyde–ketone crossed-benzoin reaction: mechanism, regioselectivity, stereoselectivity, and role of NHC
Source: Royal Society of Chemistry journal article supplement (doi:10.1039/c6ob00791k), 2016-01-01
Supplement: c6ob00791k1.pdf [file c6ob00791k1.pdf]

**Electronic Supplementary Information For**

**DFT study on NHC-catalyzed intramolecular aldehyde-ketone crossed-benzoin  
reaction: mechanism, regioselectivity, stereoselectivity, and role of NHC**

Wei Zhang, Yang Wang, Donghui Wei,\* Mingsheng Tang, and Xinju Zhu\*

The College of Chemistry and Molecular Engineering, Center of Computational Chemistry,

Zhengzhou University, Zhengzhou, Henan Province, 450001, P.R. China

---

\* Corresponding author: [donghuiwei@zzu.du.cn](mailto:donghuiwei@zzu.du.cn) (D. H. Wei) and [zhuxinju@zzu.edu.cn](mailto:zhuxinju@zzu.edu.cn)

**List of the energies and Cartesian coordinates of all the structures involved in the reaction**

**React**

Total Energy= -804.15665631  
Sum of electronic and zero-point Energies= -803.919574  
Sum of electronic and thermal Energies= -803.904777  
Sum of electronic and thermal Enthalpies= -803.903833  
Sum of electronic and thermal Free Energies= -803.963802

|   |             |             |             |
|---|-------------|-------------|-------------|
| C | 1.43336500  | -1.68648300 | 0.33463600  |
| C | 1.41951000  | -0.52169300 | -0.43517300 |
| C | 2.23873500  | 0.56468300  | -0.08557200 |
| C | 3.07268100  | 0.46540300  | 1.02787600  |
| C | 3.09991500  | -0.69113700 | 1.79471900  |
| C | 2.27605000  | -1.75726700 | 1.44167900  |
| H | 0.79845800  | -2.53013200 | 0.09161100  |
| H | 3.68942500  | 1.32600800  | 1.26780700  |
| H | 3.74900300  | -0.76290100 | 2.66009800  |
| H | 2.28155900  | -2.66610600 | 2.03505400  |
| C | 2.22864900  | 1.82518900  | -0.86701800 |
| O | 2.90798400  | 2.78514400  | -0.57702500 |
| H | 1.55723500  | 1.84865400  | -1.74367200 |
| O | 0.64805800  | -0.35605000 | -1.54802800 |
| C | -0.31384700 | -1.34665500 | -1.84424600 |
| H | -0.77158000 | -1.03301000 | -2.78775700 |
| H | 0.14306200  | -2.33102900 | -1.98875900 |
| C | -1.41078900 | -1.49572600 | -0.78359100 |
| O | -1.77020100 | -2.61450600 | -0.47968400 |
| C | -2.02702900 | -0.27791600 | -0.18215600 |
| C | -1.80113300 | 1.01048700  | -0.67811900 |
| C | -2.88846300 | -0.46303300 | 0.90435600  |
| C | -2.43083900 | 2.10078900  | -0.08651800 |
| H | -1.13321900 | 1.16572300  | -1.51833800 |
| C | -3.50927800 | 0.62783700  | 1.49608300  |
| H | -3.05419500 | -1.47314000 | 1.26427700  |
| C | -3.27961900 | 1.91104900  | 1.00062300  |
| H | -2.25608200 | 3.09928800  | -0.47307500 |
| H | -4.17374700 | 0.48195600  | 2.34135000  |
| H | -3.76408700 | 2.76482100  | 1.46382300  |

**Cat**

Total Energy= -2355.60911444  
Sum of electronic and zero-point Energies= -2355.240825

|                                              |             |             |              |
|----------------------------------------------|-------------|-------------|--------------|
| Sum of electronic and thermal Energies=      |             |             | -2355.218160 |
| Sum of electronic and thermal Enthalpies=    |             |             | -2355.217215 |
| Sum of electronic and thermal Free Energies= |             |             | -2355.295042 |
| C                                            | -4.06572600 | 1.05029100  | -1.16627900  |
| C                                            | -4.50294800 | -0.12336500 | -0.27383200  |
| C                                            | -2.92093300 | 0.92408900  | 0.97522200   |
| C                                            | -2.92430700 | 1.71895200  | -0.34838300  |
| H                                            | -3.77227400 | 0.71431800  | -2.16157300  |
| H                                            | -4.90558300 | 1.73518100  | -1.31160800  |
| H                                            | -1.95219600 | 1.67278600  | -0.84983200  |
| H                                            | -3.12621400 | 2.77656600  | -0.16644100  |
| C                                            | -4.41152600 | 0.52131400  | 1.14797300   |
| C                                            | -3.32982300 | -1.14019800 | -0.22422100  |
| H                                            | -3.67772400 | -2.06324500 | 0.24797700   |
| C                                            | -2.28352400 | -0.45161300 | 0.71832700   |
| H                                            | -2.19888600 | -1.00367400 | 1.65491600   |
| H                                            | -2.46618200 | 1.44903800  | 1.81944200   |
| C                                            | -0.67117400 | -0.68005900 | -1.15915500  |
| C                                            | -1.76790400 | -0.96416300 | -2.12787000  |
| C                                            | 0.20057300  | -0.15604400 | 0.85788300   |
| H                                            | -1.40993100 | -1.65591500 | -2.89259300  |
| N                                            | -0.94508700 | -0.42496400 | 0.15588800   |
| O                                            | -2.86867600 | -1.58916600 | -1.49590400  |
| H                                            | -2.05259300 | -0.03068900 | -2.62763700  |
| N                                            | 0.60247900  | -0.59832500 | -1.39365700  |
| N                                            | 1.09906200  | -0.27150300 | -0.14514500  |
| C                                            | 2.49415200  | -0.08236400 | -0.00955800  |
| C                                            | 3.33611900  | -1.15255800 | 0.29917300   |
| C                                            | 3.06423300  | 1.17781300  | -0.20329800  |
| C                                            | 4.70880100  | -0.98152000 | 0.42628400   |
| C                                            | 4.43296100  | 1.38066500  | -0.08232000  |
| C                                            | 5.23460800  | 0.28998700  | 0.23227100   |
| H                                            | 5.34878700  | -1.82043200 | 0.66997000   |
| H                                            | 4.86072700  | 2.36438700  | -0.23050700  |
| Cl                                           | 2.04225000  | 2.51978500  | -0.60099500  |
| Cl                                           | 6.95047000  | 0.52407800  | 0.38761900   |
| Cl                                           | 2.65687100  | -2.72856000 | 0.53274900   |
| C                                            | -5.81710400 | -0.76462600 | -0.67261300  |
| H                                            | -6.10598900 | -1.54934500 | 0.03478000   |
| H                                            | -6.62172800 | -0.02391900 | -0.71277900  |
| H                                            | -5.72902200 | -1.22102200 | -1.66366100  |
| C                                            | -5.33577400 | 1.72548200  | 1.35446300   |
| H                                            | -6.38345900 | 1.41807500  | 1.27088700   |
| H                                            | -5.19079900 | 2.12845700  | 2.36191700   |

|   |             |             |            |
|---|-------------|-------------|------------|
| H | -5.16594800 | 2.53777900  | 0.64680600 |
| C | -4.69091000 | -0.45003400 | 2.30390200 |
| H | -4.36371100 | -0.00756500 | 3.25048300 |
| H | -5.76751200 | -0.63214300 | 2.38110700 |
| H | -4.20733300 | -1.42419700 | 2.20882600 |

### Et<sub>3</sub>N

Total Energy= -292.27369194

Sum of electronic and zero-point Energies= -292.065686

Sum of electronic and thermal Energies= -292.056565

Sum of electronic and thermal Enthalpies= -292.055621

Sum of electronic and thermal Free Energies= -292.099076

|   |             |             |             |
|---|-------------|-------------|-------------|
| N | -0.00085100 | -0.43032900 | -0.29494700 |
| C | -1.19377800 | -0.84169500 | 0.44248800  |
| H | -1.22307200 | -0.40152400 | 1.45716800  |
| H | -1.11666500 | -1.92618500 | 0.58558300  |
| C | 1.19153600  | -0.84410600 | 0.44200500  |
| H | 1.11291800  | -1.92859800 | 0.58428000  |
| H | 1.22155300  | -0.40471500 | 1.45700100  |
| C | 0.00065400  | 0.98759200  | -0.65915600 |
| H | -0.87167500 | 1.17058500  | -1.29379000 |
| H | 0.87169100  | 1.16804300  | -1.29634100 |
| C | -2.49661400 | -0.52987100 | -0.28267900 |
| H | -3.32761100 | -1.03874900 | 0.21176200  |
| H | -2.72091200 | 0.54023200  | -0.28614600 |
| H | -2.44686500 | -0.87475300 | -1.31945300 |
| C | 0.00390300  | 1.98591500  | 0.50238300  |
| H | 0.89009900  | 1.86770600  | 1.13362700  |
| H | 0.00424600  | 3.00879400  | 0.11644000  |
| H | -0.88001800 | 1.86964600  | 1.13717300  |
| C | 2.49470000  | -0.53341900 | -0.28302900 |
| H | 2.71992600  | 0.53650000  | -0.28626900 |
| H | 3.32518100  | -1.04314800 | 0.21140100  |
| H | 2.44475200  | -0.87803000 | -1.31988100 |

### Et<sub>3</sub>N·H<sup>+</sup>

Total Energy= -292.72902425

Sum of electronic and zero-point Energies= -292.504679

Sum of electronic and thermal Energies= -292.495758

Sum of electronic and thermal Enthalpies= -292.494813

Sum of electronic and thermal Free Energies= -292.537339

|   |            |             |             |
|---|------------|-------------|-------------|
| N | 0.02177000 | -0.41868400 | 0.28124200  |
| H | 0.04521800 | -0.94891700 | 1.15864200  |
| C | 1.26247100 | -0.80268700 | -0.48672600 |

|   |             |             |             |
|---|-------------|-------------|-------------|
| H | 1.19931200  | -0.30265400 | -1.45478800 |
| H | 1.17974100  | -1.87795500 | -0.65478100 |
| C | -1.20691100 | -0.87917500 | -0.46467100 |
| H | -1.09044700 | -1.95859500 | -0.57837000 |
| H | -1.15838000 | -0.42666100 | -1.45666600 |
| C | -0.01822000 | 1.03813300  | 0.67664600  |
| H | 0.87628800  | 1.21970500  | 1.27247000  |
| H | -0.87925600 | 1.15291800  | 1.33518000  |
| C | 2.54516900  | -0.46136900 | 0.24843900  |
| H | 3.37406800  | -0.93725500 | -0.27791800 |
| H | 2.73964300  | 0.61226100  | 0.27073500  |
| H | 2.53658500  | -0.84548100 | 1.27250200  |
| C | -0.09844500 | 1.97388900  | -0.51363900 |
| H | -1.00831600 | 1.82010000  | -1.09803000 |
| H | -0.11894600 | 2.99657900  | -0.13348600 |
| H | 0.76826000  | 1.88504700  | -1.17213600 |
| C | -2.49998800 | -0.54243300 | 0.25338700  |
| H | -2.71479800 | 0.52764600  | 0.24174100  |
| H | -3.31617000 | -1.04986600 | -0.26320800 |
| H | -2.48965000 | -0.89423700 | 1.28880200  |

### Pre-Cat

Total Energy= -2356.07572596

Sum of electronic and zero-point Energies= -2355.693438

Sum of electronic and thermal Energies= -2355.670895

Sum of electronic and thermal Enthalpies= -2355.669950

Sum of electronic and thermal Free Energies= -2355.746127

|   |             |             |             |
|---|-------------|-------------|-------------|
| C | -4.09811800 | 0.93777700  | -1.25957500 |
| C | -4.52073800 | -0.16253800 | -0.27286600 |
| C | -2.95437000 | 1.01273300  | 0.88755300  |
| C | -2.96530400 | 1.68728500  | -0.50207200 |
| H | -3.80571100 | 0.52938500  | -2.22733600 |
| H | -4.94571500 | 1.59851600  | -1.45728900 |
| H | -1.99327900 | 1.62328900  | -1.00290100 |
| H | -3.18126400 | 2.75255300  | -0.40513500 |
| C | -4.44100400 | 0.60010400  | 1.09083200  |
| C | -3.34081400 | -1.16028700 | -0.13167700 |
| H | -3.67646100 | -2.04243600 | 0.41832400  |
| C | -2.31414800 | -0.37913000 | 0.76347300  |
| H | -2.21761900 | -0.85311900 | 1.74036600  |
| H | -2.51526900 | 1.61663400  | 1.68623500  |
| C | -0.67818200 | -0.74084300 | -1.10973100 |
| C | -1.78028800 | -1.10876700 | -2.04447900 |
| C | 0.19504000  | -0.11405500 | 0.77228500  |

|    |             |             |             |
|----|-------------|-------------|-------------|
| H  | -1.40877600 | -1.84311400 | -2.76069400 |
| N  | -0.96618400 | -0.39837600 | 0.18373300  |
| O  | -2.84450700 | -1.71452800 | -1.34494200 |
| H  | -2.08267100 | -0.21524900 | -2.60040600 |
| N  | 0.60372000  | -0.67554700 | -1.34034600 |
| N  | 1.13036500  | -0.27732300 | -0.15217500 |
| C  | 2.53405300  | -0.07594100 | -0.01022100 |
| C  | 3.36491300  | -1.15176800 | 0.30659800  |
| C  | 3.08021900  | 1.19035000  | -0.22587200 |
| C  | 4.73530400  | -0.96806700 | 0.42346100  |
| C  | 4.44831400  | 1.39245900  | -0.11141800 |
| C  | 5.25463900  | 0.30547400  | 0.21261800  |
| H  | 5.38091000  | -1.80141100 | 0.67157500  |
| H  | 4.87444100  | 2.37468300  | -0.27411500 |
| Cl | 2.04456100  | 2.51103400  | -0.64016800 |
| Cl | 6.96321100  | 0.54550000  | 0.35717900  |
| Cl | 2.68137600  | -2.71798300 | 0.55429800  |
| C  | -5.82568900 | -0.85236500 | -0.61717600 |
| H  | -6.10013600 | -1.58661600 | 0.14726800  |
| H  | -6.63911900 | -0.12668300 | -0.70712900 |
| H  | -5.73431200 | -1.37748800 | -1.57283900 |
| C  | -5.37621900 | 1.80845000  | 1.19519300  |
| H  | -6.41886700 | 1.48379300  | 1.12462900  |
| H  | -5.24594600 | 2.28470600  | 2.17172500  |
| H  | -5.20748200 | 2.56943100  | 0.43276100  |
| C  | -4.71191000 | -0.27162900 | 2.32615600  |
| H  | -4.39386900 | 0.25484900  | 3.23156600  |
| H  | -5.78678300 | -0.45497100 | 2.41433900  |
| H  | -4.22377900 | -1.24852500 | 2.32042100  |
| H  | 0.35273100  | 0.18590600  | 1.79890900  |

## TS0

Total Energy= -2648.36364314

Sum of electronic and zero-point Energies= -2647.774982

Sum of electronic and thermal Energies= -2647.742421

Sum of electronic and thermal Enthalpies= -2647.741477

Sum of electronic and thermal Free Energies= -2647.837922

|   |             |             |             |
|---|-------------|-------------|-------------|
| C | -4.36967800 | -1.32736300 | -1.47257500 |
| C | -4.73303000 | -0.82623300 | -0.06493100 |
| C | -3.09519800 | 0.60282900  | -0.72613900 |
| C | -3.18588900 | -0.40756900 | -1.88955300 |
| H | -4.14245700 | -2.39361900 | -1.47840400 |
| H | -5.22496500 | -1.19679900 | -2.14016200 |
| H | -2.24581900 | -0.94968400 | -2.03821400 |

|    |             |             |             |
|----|-------------|-------------|-------------|
| H  | -3.38856000 | 0.10790400  | -2.83023500 |
| C  | -4.56611200 | 0.71822100  | -0.23632800 |
| C  | -3.54725900 | -1.15523000 | 0.88091700  |
| H  | -3.85240900 | -0.97545500 | 1.91481600  |
| C  | -2.45952400 | -0.09229500 | 0.48930900  |
| H  | -2.31938900 | 0.61889900  | 1.30451300  |
| H  | -2.61549100 | 1.54962600  | -0.98513200 |
| C  | -0.95499200 | -2.03848600 | 0.05768800  |
| C  | -2.11283400 | -2.97755900 | 0.04720000  |
| C  | 0.04989200  | -0.07986500 | 0.22965500  |
| H  | -1.78993200 | -3.94656600 | 0.43108500  |
| N  | -1.14852400 | -0.69793500 | 0.26426200  |
| O  | -3.13830500 | -2.51722700 | 0.90250600  |
| H  | -2.45009100 | -3.11830700 | -0.98528200 |
| N  | 0.30508400  | -2.30830900 | -0.11644500 |
| N  | 0.89893100  | -1.08246300 | -0.01133100 |
| C  | 2.30560100  | -0.95940700 | -0.15785500 |
| C  | 3.15623000  | -1.31688900 | 0.89102000  |
| C  | 2.85222000  | -0.46796300 | -1.34542900 |
| C  | 4.53238600  | -1.17814500 | 0.76842100  |
| C  | 4.22470100  | -0.31087900 | -1.48534200 |
| C  | 5.04482900  | -0.67035400 | -0.42093200 |
| H  | 5.18651700  | -1.44965100 | 1.58776400  |
| H  | 4.64222200  | 0.07781800  | -2.40592300 |
| Cl | 1.81125500  | -0.04558500 | -2.66405100 |
| Cl | 6.75831600  | -0.47189900 | -0.57948800 |
| Cl | 2.48703800  | -1.89091700 | 2.37683200  |
| C  | -6.05818900 | -1.33499700 | 0.46616800  |
| H  | -6.29088200 | -0.88809600 | 1.43841900  |
| H  | -6.87309500 | -1.10222700 | -0.22542300 |
| H  | -6.02250700 | -2.42127600 | 0.59359200  |
| C  | -5.48847600 | 1.34340000  | -1.28750200 |
| H  | -6.53513300 | 1.22014500  | -0.99190700 |
| H  | -5.28962500 | 2.41777600  | -1.35277600 |
| H  | -5.36860000 | 0.92423300  | -2.28698100 |
| C  | -4.75769900 | 1.52930300  | 1.05449100  |
| H  | -4.36208400 | 2.54211800  | 0.92234500  |
| H  | -5.82555900 | 1.62227700  | 1.27347300  |
| H  | -4.28802800 | 1.10207100  | 1.94311800  |
| H  | 0.40856400  | 1.20159700  | 0.42966000  |
| N  | 0.71688900  | 2.52549100  | 0.61399100  |
| C  | 1.99443900  | 2.88149700  | -0.05912600 |
| H  | 1.96223900  | 2.43110200  | -1.05569500 |
| H  | 2.02698900  | 3.97160900  | -0.19475600 |

|   |             |            |             |
|---|-------------|------------|-------------|
| C | -0.42344800 | 3.21964600 | -0.03353500 |
| H | -1.33913800 | 2.81026300 | 0.40526800  |
| H | -0.38706700 | 4.28615600 | 0.22808100  |
| C | 0.75833700  | 2.81438000 | 2.06877000  |
| H | 1.61212600  | 2.27404100 | 2.48086500  |
| H | 0.94133300  | 3.88868200 | 2.21193000  |
| C | 3.24918200  | 2.41411300 | 0.66539500  |
| H | 4.10012000  | 2.51835000 | -0.01199900 |
| H | 3.46006800  | 3.00699700 | 1.55711300  |
| H | 3.18266200  | 1.36241000 | 0.95928400  |
| C | -0.49316600 | 2.37483600 | 2.81764100  |
| H | -0.33126200 | 2.52906500 | 3.88633600  |
| H | -1.38356000 | 2.94135200 | 2.53731600  |
| H | -0.68411700 | 1.30694700 | 2.67008500  |
| C | -0.46942100 | 3.03879000 | -1.54581700 |
| H | -1.41670100 | 3.43406400 | -1.92018100 |
| H | 0.33438500  | 3.57490900 | -2.05274300 |
| H | -0.41073600 | 1.98172800 | -1.82830300 |

### Re-TS1

Total Energy= -3159.77995662

Sum of electronic and zero-point Energies= -3159.172815

Sum of electronic and thermal Energies= -3159.134880

Sum of electronic and thermal Enthalpies= -3159.133936

Sum of electronic and thermal Free Energies= -3159.244625

|   |             |             |             |
|---|-------------|-------------|-------------|
| C | 2.24947900  | 3.34498600  | 0.22842100  |
| C | 1.23961500  | 2.42311000  | -0.02517900 |
| C | 1.36080200  | 1.48256400  | -1.05025200 |
| C | 2.51099900  | 1.48888800  | -1.83614200 |
| C | 3.53118300  | 2.40466800  | -1.59233600 |
| C | 3.40141800  | 3.32991200  | -0.55629900 |
| H | 2.12465200  | 4.05338300  | 1.04133000  |
| H | 2.58279600  | 0.75206600  | -2.63155000 |
| H | 4.42954800  | 2.39480800  | -2.20198600 |
| H | 4.19631100  | 4.04244800  | -0.35910000 |
| C | 0.27186800  | 0.46563900  | -1.31270000 |
| O | 0.31216700  | -0.25613500 | -2.33001200 |
| H | -0.70301000 | 0.77260100  | -0.88394100 |
| O | 0.10674600  | 2.40380600  | 0.76536900  |
| C | -0.95357000 | 3.17615400  | 0.24855300  |
| H | -0.87362800 | 4.22273500  | 0.57557400  |
| H | -0.94526700 | 3.17460600  | -0.85144600 |
| C | -2.28049400 | 2.59343800  | 0.71174000  |
| O | -2.31757200 | 1.56840100  | 1.36349900  |



|    |             |             |             |
|----|-------------|-------------|-------------|
| C  | -3.52796600 | 3.31579200  | 0.32138000  |
| C  | -3.51179000 | 4.44237000  | -0.50786800 |
| C  | -4.74754000 | 2.82557600  | 0.80101100  |
| C  | -4.70544200 | 5.06765500  | -0.85469100 |
| H  | -2.57702000 | 4.83790900  | -0.89278600 |
| C  | -5.93751100 | 3.45187600  | 0.45461000  |
| H  | -4.73876400 | 1.95215600  | 1.44475700  |
| C  | -5.91653600 | 4.57343700  | -0.37479200 |
| H  | -4.69037500 | 5.93976400  | -1.49935800 |
| H  | -6.88118000 | 3.06946300  | 0.82905800  |
| H  | -6.84575500 | 5.06358900  | -0.64705600 |
| C  | -2.87992100 | -4.05348900 | -0.84335200 |
| C  | -3.63323800 | -3.11591300 | 0.11600100  |
| C  | -2.32492400 | -1.69832600 | -1.08866200 |
| C  | -1.92306900 | -3.09457900 | -1.60697400 |
| H  | -2.38114000 | -4.86180200 | -0.30680200 |
| H  | -3.58990500 | -4.53202500 | -1.52378600 |
| H  | -0.86284700 | -3.30009300 | -1.42661100 |
| H  | -2.06415300 | -3.16082300 | -2.68773700 |
| C  | -3.83952000 | -1.85401800 | -0.78517900 |
| C  | -2.60723600 | -2.58694700 | 1.15315100  |
| H  | -3.14052900 | -2.07509600 | 1.95891100  |
| C  | -1.78501300 | -1.52904600 | 0.34252100  |
| H  | -1.99556000 | -0.52593900 | 0.71336300  |
| H  | -2.03812900 | -0.88293000 | -1.75649900 |
| C  | 0.24223600  | -2.82668900 | 1.01463100  |
| C  | -0.59323400 | -4.00041100 | 1.39938700  |
| C  | 0.59644600  | -0.78804600 | 0.20496400  |
| H  | -0.12106900 | -4.52913100 | 2.22920000  |
| N  | -0.35013000 | -1.70580400 | 0.50237400  |
| O  | -1.87215900 | -3.59426600 | 1.84672700  |
| H  | -0.64844800 | -4.68911400 | 0.54780300  |
| N  | 1.53387600  | -2.69299800 | 1.06729000  |
| N  | 1.72197700  | -1.42868100 | 0.54993200  |
| C  | 3.02881800  | -0.89422000 | 0.43828600  |
| C  | 3.87948200  | -1.30995600 | -0.58698100 |
| C  | 3.46906900  | 0.09280300  | 1.32326400  |
| C  | 5.14174500  | -0.75200400 | -0.74361300 |
| C  | 4.71985300  | 0.67768300  | 1.17729500  |
| C  | 5.53589300  | 0.24434200  | 0.13993800  |
| H  | 5.78931100  | -1.07437600 | -1.54941300 |
| H  | 5.04533700  | 1.45541900  | 1.85701800  |
| Cl | 2.45000400  | 0.59631800  | 2.62790800  |
| Cl | 7.08967300  | 0.99181700  | -0.07135600 |

|    |             |             |             |
|----|-------------|-------------|-------------|
| Cl | 3.33881800  | -2.50407300 | -1.71791100 |
| C  | -4.86031000 | -3.72834600 | 0.76129300  |
| H  | -5.38463500 | -2.99866000 | 1.38773400  |
| H  | -5.55943600 | -4.09852600 | 0.00512400  |
| H  | -4.57317100 | -4.57231400 | 1.39666500  |
| C  | -4.67692700 | -2.11142800 | -2.04109600 |
| H  | -5.69102600 | -2.41933300 | -1.76527100 |
| H  | -4.75993500 | -1.18552400 | -2.61916600 |
| H  | -4.25975900 | -2.87349400 | -2.70077900 |
| C  | -4.47390900 | -0.65169100 | -0.06945600 |
| H  | -4.35414900 | 0.25000500  | -0.68128300 |
| H  | -5.54818200 | -0.81989200 | 0.06087400  |
| H  | -4.05334000 | -0.42768200 | 0.91318200  |

### ***Si-TS1***

Total Energy= -3159.77757048

Sum of electronic and zero-point Energies= -3159.171171

Sum of electronic and thermal Energies= -3159.132995

Sum of electronic and thermal Enthalpies= -3159.132051

Sum of electronic and thermal Free Energies= -3159.244766

|   |             |             |             |
|---|-------------|-------------|-------------|
| C | 1.03379800  | 3.12869200  | -0.10765600 |
| C | 0.82872200  | 1.85504900  | -0.62507800 |
| C | -0.28839700 | 1.56457300  | -1.41288000 |
| C | -1.18933500 | 2.58640200  | -1.69900400 |
| C | -0.99750700 | 3.86882700  | -1.18795100 |
| C | 0.11197300  | 4.13711700  | -0.38937300 |
| H | 1.90223100  | 3.31389100  | 0.51702700  |
| H | -2.04118400 | 2.34008700  | -2.32711300 |
| H | -1.71099300 | 4.65593100  | -1.41046800 |
| H | 0.26554800  | 5.13164400  | 0.01654100  |
| C | -0.54897000 | 0.17270800  | -1.95617600 |
| O | -1.51770900 | -0.02464600 | -2.71444500 |
| H | 0.37756900  | -0.42185500 | -2.07461900 |
| O | 1.71499300  | 0.83383600  | -0.31788900 |
| C | 2.72386400  | 0.63841900  | -1.30033200 |
| H | 3.19379800  | -0.32635800 | -1.07209300 |
| H | 2.29983700  | 0.59955800  | -2.30935100 |
| C | 3.78879100  | 1.73753200  | -1.30464800 |
| O | 4.11232700  | 2.24226300  | -2.36197300 |
| C | 4.43260600  | 2.13726100  | -0.01923300 |
| C | 4.23786300  | 1.41593200  | 1.16278000  |
| C | 5.27579200  | 3.25346300  | -0.02236200 |
| C | 4.88713200  | 1.80600000  | 2.32975600  |
| H | 3.57312400  | 0.55956800  | 1.17315600  |

|    |             |             |             |
|----|-------------|-------------|-------------|
| C  | 5.91582300  | 3.64643900  | 1.14572600  |
| H  | 5.41493500  | 3.79693800  | -0.95113500 |
| C  | 5.72304300  | 2.92112300  | 2.32207800  |
| H  | 4.73579100  | 1.24308900  | 3.24519200  |
| H  | 6.56525600  | 4.51545100  | 1.14327800  |
| H  | 6.22452200  | 3.22740200  | 3.23467500  |
| C  | -5.79099500 | -1.08599100 | 0.43650600  |
| C  | -5.52901400 | 0.37115200  | 0.85234100  |
| C  | -4.11693800 | 0.06569800  | -0.90612400 |
| C  | -4.76535100 | -1.32192700 | -0.70874900 |
| H  | -5.69657800 | -1.76983600 | 1.28091900  |
| H  | -6.81905200 | -1.18823100 | 0.07860500  |
| H  | -4.01888600 | -2.08707900 | -0.47031700 |
| H  | -5.25573400 | -1.65391700 | -1.62611700 |
| C  | -5.26521300 | 1.04421500  | -0.53346100 |
| C  | -4.11690700 | 0.43041100  | 1.49464300  |
| H  | -3.97824400 | 1.40591800  | 1.96901900  |
| C  | -3.15151400 | 0.32613800  | 0.26138500  |
| H  | -2.63040400 | 1.27213800  | 0.10870900  |
| H  | -3.63505000 | 0.21423400  | -1.87393100 |
| C  | -2.12024000 | -1.61179500 | 1.45268400  |
| C  | -3.31439200 | -1.74452900 | 2.33363800  |
| C  | -0.91430600 | -0.72041300 | -0.18631900 |
| H  | -3.00620900 | -2.13711600 | 3.30407800  |
| N  | -2.09683400 | -0.66024800 | 0.46726500  |
| O  | -3.90344400 | -0.48097900 | 2.56998300  |
| H  | -4.01554400 | -2.45830100 | 1.88682500  |
| N  | -1.01787300 | -2.29733200 | 1.47143300  |
| N  | -0.29539000 | -1.72828100 | 0.44425200  |
| C  | 1.02515200  | -2.17515600 | 0.19288500  |
| C  | 2.04643300  | -1.89809000 | 1.10702200  |
| C  | 1.33210400  | -2.90100000 | -0.96001900 |
| C  | 3.34744300  | -2.32967600 | 0.88322900  |
| C  | 2.63066100  | -3.33113500 | -1.21316200 |
| C  | 3.61929800  | -3.04088600 | -0.28194800 |
| H  | 4.13021200  | -2.11270600 | 1.60035300  |
| H  | 2.85752400  | -3.88983400 | -2.11269600 |
| Cl | 0.08245800  | -3.29012400 | -2.09334200 |
| Cl | 5.24328900  | -3.57816900 | -0.57927600 |
| Cl | 1.69873200  | -0.98467900 | 2.53403000  |
| C  | -6.60087000 | 0.97444300  | 1.73820200  |
| H  | -6.38996200 | 2.02667700  | 1.95716200  |
| H  | -7.58448600 | 0.91193500  | 1.26255200  |
| H  | -6.65166400 | 0.43651300  | 2.69024000  |

|   |             |             |             |
|---|-------------|-------------|-------------|
| C | -6.44776500 | 0.96868400  | -1.50426900 |
| H | -7.30585600 | 1.51819100  | -1.10294800 |
| H | -6.16986100 | 1.43940300  | -2.45254900 |
| H | -6.77270100 | -0.04864500 | -1.72589400 |
| C | -4.85944000 | 2.52341600  | -0.45225500 |
| H | -4.47669100 | 2.85893300  | -1.42179500 |
| H | -5.73705400 | 3.13391200  | -0.21655800 |
| H | -4.09907900 | 2.75166000  | 0.29793000  |

**Re-M1**

Total Energy= -3159.78830730

Sum of electronic and zero-point Energies= -3159.180019

Sum of electronic and thermal Energies= -3159.141974

Sum of electronic and thermal Enthalpies= -3159.141030

Sum of electronic and thermal Free Energies= -3159.251172

|   |             |             |             |
|---|-------------|-------------|-------------|
| C | 2.19596300  | 3.34809100  | 0.02593800  |
| C | 1.27403300  | 2.31822100  | -0.13093700 |
| C | 1.47110500  | 1.30322200  | -1.06679100 |
| C | 2.60270100  | 1.34677100  | -1.87501800 |
| C | 3.53872600  | 2.36798500  | -1.72918800 |
| C | 3.33835900  | 3.36428500  | -0.77294400 |
| H | 2.01808700  | 4.11203800  | 0.77677100  |
| H | 2.71882000  | 0.54897100  | -2.60342800 |
| H | 4.42802100  | 2.38536800  | -2.35210900 |
| H | 4.07014400  | 4.15629200  | -0.64908700 |
| C | 0.47556100  | 0.14565100  | -1.20953800 |
| O | 0.63135200  | -0.66426200 | -2.24418900 |
| H | -0.54119300 | 0.59990100  | -1.08120300 |
| O | 0.14296100  | 2.25725700  | 0.66905400  |
| C | -0.92264800 | 3.02802700  | 0.15985800  |
| H | -0.80209100 | 4.09071100  | 0.41558500  |
| H | -0.96889500 | 2.95729300  | -0.93728000 |
| C | -2.23766300 | 2.51245100  | 0.72172000  |
| O | -2.26614300 | 1.53689600  | 1.44796900  |
| C | -3.48683400 | 3.22962900  | 0.32961900  |
| C | -3.48586100 | 4.28262700  | -0.59099400 |
| C | -4.69220500 | 2.81086200  | 0.90313200  |
| C | -4.68149900 | 4.90443800  | -0.93704000 |
| H | -2.56155800 | 4.62327900  | -1.04705300 |
| C | -5.88415400 | 3.43341700  | 0.55703100  |
| H | -4.67109700 | 1.99751700  | 1.62130500  |
| C | -5.87880200 | 4.48024900  | -0.36500300 |
| H | -4.67825400 | 5.71918600  | -1.65312100 |
| H | -6.81707400 | 3.10643200  | 1.00397000  |

|    |             |             |             |
|----|-------------|-------------|-------------|
| H  | -6.80966000 | 4.96735600  | -0.63712200 |
| C  | -2.90690000 | -4.05005700 | -0.57518200 |
| C  | -3.70378500 | -2.93532000 | 0.12532400  |
| C  | -2.27579100 | -1.79732600 | -1.23543000 |
| C  | -1.88164500 | -3.27233000 | -1.44825100 |
| H  | -2.46158200 | -4.73927300 | 0.14415400  |
| H  | -3.57994500 | -4.65130000 | -1.19249800 |
| H  | -0.83824000 | -3.45204100 | -1.16913400 |
| H  | -1.96300000 | -3.54380800 | -2.50262600 |
| C  | -3.81203800 | -1.86530200 | -1.01392900 |
| C  | -2.74419100 | -2.22623500 | 1.11504500  |
| H  | -3.31563100 | -1.54371800 | 1.75079500  |
| C  | -1.83330900 | -1.37332800 | 0.17261200  |
| H  | -2.02475600 | -0.31598400 | 0.34171000  |
| H  | -1.90687300 | -1.12549600 | -2.01369100 |
| C  | 0.09989200  | -2.53709000 | 1.25943700  |
| C  | -0.80269900 | -3.58625200 | 1.81426900  |
| C  | 0.59030700  | -0.79307400 | 0.02105700  |
| H  | -0.41162200 | -3.93980000 | 2.76959900  |
| N  | -0.42028200 | -1.55730900 | 0.46432000  |
| O  | -2.09714000 | -3.07672600 | 2.05986400  |
| H  | -0.81243700 | -4.43225900 | 1.11674200  |
| N  | 1.39049100  | -2.42449400 | 1.36641200  |
| N  | 1.67729300  | -1.33102500 | 0.58619500  |
| C  | 3.00974400  | -0.85797000 | 0.47359700  |
| C  | 3.86998800  | -1.38089900 | -0.49102100 |
| C  | 3.45954300  | 0.16384900  | 1.31328600  |
| C  | 5.14466200  | -0.85451400 | -0.66278300 |
| C  | 4.72289900  | 0.71310000  | 1.15112300  |
| C  | 5.54073500  | 0.19929900  | 0.15114500  |
| H  | 5.80490400  | -1.25187300 | -1.42361400 |
| H  | 5.05630600  | 1.52420100  | 1.78635500  |
| Cl | 2.42517700  | 0.75634200  | 2.56627600  |
| Cl | 7.10924900  | 0.90340000  | -0.08904900 |
| Cl | 3.34374700  | -2.68198900 | -1.49592900 |
| C  | -4.98886800 | -3.40005300 | 0.78131100  |
| H  | -5.53617400 | -2.56186300 | 1.22581600  |
| H  | -5.64370100 | -3.89322000 | 0.05615300  |
| H  | -4.76841900 | -4.11696300 | 1.57868400  |
| C  | -4.57476100 | -2.34508100 | -2.25192400 |
| H  | -5.62000500 | -2.54984000 | -1.99793100 |
| H  | -4.56845700 | -1.55703500 | -3.01152100 |
| H  | -4.15638000 | -3.24393400 | -2.70704000 |
| C  | -4.45434700 | -0.53713000 | -0.58487500 |

|   |             |             |             |
|---|-------------|-------------|-------------|
| H | -4.30479400 | 0.21671300  | -1.36582100 |
| H | -5.53410200 | -0.66887300 | -0.46003800 |
| H | -4.06732400 | -0.11655800 | 0.34660900  |

**Si-M1**

Total Energy= -3159.78563362

Sum of electronic and zero-point Energies= -3159.177383

Sum of electronic and thermal Energies= -3159.139484

Sum of electronic and thermal Enthalpies= -3159.138540

Sum of electronic and thermal Free Energies= -3159.249012

|   |             |             |             |
|---|-------------|-------------|-------------|
| C | 1.17194200  | 3.17798600  | -0.22235500 |
| C | 0.88166200  | 1.86062000  | -0.56116700 |
| C | -0.29025400 | 1.52164400  | -1.23765300 |
| C | -1.16045200 | 2.54141400  | -1.60943100 |
| C | -0.88689300 | 3.86828100  | -1.28069900 |
| C | 0.27515200  | 4.18437900  | -0.57971500 |
| H | 2.08731600  | 3.40105100  | 0.31758700  |
| H | -2.04264400 | 2.24736400  | -2.17251500 |
| H | -1.57567800 | 4.65486400  | -1.57283000 |
| H | 0.49249300  | 5.21451100  | -0.31655000 |
| C | -0.64105300 | 0.06075300  | -1.60800900 |
| O | -1.66375600 | -0.09771000 | -2.42151700 |
| H | 0.32396400  | -0.41710600 | -1.91264100 |
| O | 1.76459600  | 0.84154800  | -0.22123200 |
| C | 2.73847300  | 0.59954000  | -1.23063200 |
| H | 3.20516700  | -0.36341200 | -0.98975800 |
| H | 2.27716000  | 0.53679700  | -2.22197000 |
| C | 3.81835900  | 1.68108100  | -1.30136300 |
| O | 4.09769400  | 2.16960700  | -2.37851900 |
| C | 4.53395500  | 2.08121100  | -0.05359600 |
| C | 4.36580300  | 1.39163300  | 1.15129100  |
| C | 5.41735500  | 3.16413600  | -0.11762200 |
| C | 5.08197100  | 1.77921100  | 2.27948800  |
| H | 3.66904500  | 0.56312700  | 1.21193900  |
| C | 6.12455900  | 3.55471100  | 1.01202400  |
| H | 5.53512300  | 3.68368500  | -1.06293800 |
| C | 5.95856700  | 2.86013000  | 2.21084100  |
| H | 4.95130600  | 1.24107600  | 3.21272300  |
| H | 6.80634200  | 4.39715000  | 0.96185400  |
| H | 6.51307100  | 3.16347000  | 3.09319100  |
| C | -5.85045800 | -1.06845600 | 0.63515400  |
| C | -5.57572800 | 0.42303700  | 0.88670900  |
| C | -4.27246700 | -0.05378300 | -0.92076100 |
| C | -4.88600400 | -1.41674700 | -0.53443300 |

|    |             |             |             |
|----|-------------|-------------|-------------|
| H  | -5.71500000 | -1.66558200 | 1.53842000  |
| H  | -6.89482500 | -1.20092800 | 0.33942300  |
| H  | -4.11550100 | -2.14566900 | -0.26040600 |
| H  | -5.42198500 | -1.85233700 | -1.38022300 |
| C  | -5.40862000 | 0.95001300  | -0.57530700 |
| C  | -4.12603300 | 0.55377900  | 1.42537700  |
| H  | -3.96884700 | 1.56640300  | 1.80706400  |
| C  | -3.24155600 | 0.35140400  | 0.14413100  |
| H  | -2.76933300 | 1.28994800  | -0.14087100 |
| H  | -3.84244900 | 0.00033300  | -1.91991700 |
| C  | -2.10197800 | -1.45852600 | 1.43264000  |
| C  | -3.25168600 | -1.54041800 | 2.37757100  |
| C  | -0.96231800 | -0.66325800 | -0.26477600 |
| H  | -2.88788600 | -1.86617900 | 3.35323100  |
| N  | -2.13404300 | -0.57128700 | 0.39316200  |
| O  | -3.83018600 | -0.26398100 | 2.55594600  |
| H  | -3.96776600 | -2.28450700 | 2.01457200  |
| N  | -0.98767100 | -2.12466400 | 1.45881200  |
| N  | -0.29100600 | -1.61683200 | 0.39103700  |
| C  | 1.02136700  | -2.09960100 | 0.14517400  |
| C  | 2.03277000  | -1.87182600 | 1.08476600  |
| C  | 1.30729600  | -2.85655600 | -0.99358900 |
| C  | 3.31280800  | -2.37314600 | 0.88789400  |
| C  | 2.58785800  | -3.35133600 | -1.21671600 |
| C  | 3.57184300  | -3.10393500 | -0.26794900 |
| H  | 4.08978000  | -2.19491900 | 1.62151400  |
| H  | 2.80289500  | -3.93022100 | -2.10633400 |
| Cl | 0.05813100  | -3.20564300 | -2.13609900 |
| Cl | 5.16925400  | -3.72848700 | -0.52630500 |
| Cl | 1.70945300  | -0.94483800 | 2.50757900  |
| C  | -6.59307300 | 1.11032500  | 1.77542200  |
| H  | -6.38368600 | 2.18172200  | 1.86379300  |
| H  | -7.60562400 | 0.98888000  | 1.37877800  |
| H  | -6.57032900 | 0.67836500  | 2.78108500  |
| C  | -6.64551700 | 0.76736300  | -1.46100700 |
| H  | -7.49585700 | 1.32123200  | -1.04892800 |
| H  | -6.44020800 | 1.17278500  | -2.45666200 |
| H  | -6.94853400 | -0.27257100 | -1.58757900 |
| C  | -5.02054500 | 2.43384400  | -0.67122800 |
| H  | -4.67237000 | 2.66311600  | -1.68395600 |
| H  | -5.89939700 | 3.05700300  | -0.47660300 |
| H  | -4.24236600 | 2.75335200  | 0.02617400  |

**Re-M01<sup>B</sup>**

|                                              |                |             |              |
|----------------------------------------------|----------------|-------------|--------------|
| Total Energy=                                | -3452.06946381 |             |              |
| Sum of electronic and zero-point Energies=   |                |             | -3451.251827 |
| Sum of electronic and thermal Energies=      |                |             | -3451.204089 |
| Sum of electronic and thermal Enthalpies=    |                |             | -3451.203145 |
| Sum of electronic and thermal Free Energies= |                |             | -3451.333064 |
| C                                            | -3.44288100    | 0.96198800  | 1.46901900   |
| C                                            | -2.19546400    | 0.51075400  | 1.05042200   |
| C                                            | -1.50871300    | -0.49450300 | 1.73799000   |
| C                                            | -2.07927300    | -1.02723000 | 2.88358100   |
| C                                            | -3.33204400    | -0.59211300 | 3.32310500   |
| C                                            | -4.00829000    | 0.39732200  | 2.61592500   |
| H                                            | -3.97249600    | 1.72751100  | 0.91019500   |
| H                                            | -1.50617800    | -1.78844000 | 3.40346300   |
| H                                            | -3.77510000    | -1.01805700 | 4.21767900   |
| H                                            | -4.98286600    | 0.73948000  | 2.95007500   |
| C                                            | -0.09703700    | -0.92691400 | 1.31220900   |
| O                                            | 0.46722700     | -1.85989500 | 2.07009500   |
| H                                            | 0.46120700     | 0.03681200  | 1.20055900   |
| O                                            | -1.55290300    | 0.94907400  | -0.07507200  |
| C                                            | -1.74141600    | 2.27206900  | -0.49639600  |
| H                                            | -2.59240500    | 2.36113200  | -1.18964300  |
| H                                            | -1.93091900    | 2.93077200  | 0.36023300   |
| C                                            | -0.46330100    | 2.69872500  | -1.21431400  |
| O                                            | 0.38232600     | 1.87860800  | -1.50375200  |
| C                                            | -0.29096000    | 4.14836500  | -1.53560400  |
| C                                            | -1.26705600    | 5.10403300  | -1.23586000  |
| C                                            | 0.90455200     | 4.54682400  | -2.14386800  |
| C                                            | -1.04521500    | 6.44443600  | -1.53911800  |
| H                                            | -2.20475800    | 4.81622500  | -0.77037400  |
| C                                            | 1.12685600     | 5.88522800  | -2.43914300  |
| H                                            | 1.64610500     | 3.78878900  | -2.37476000  |
| C                                            | 0.15118900     | 6.83516500  | -2.13584800  |
| H                                            | -1.80496600    | 7.18328400  | -1.30764400  |
| H                                            | 2.05724700     | 6.19124400  | -2.90591900  |
| H                                            | 0.32439800     | 7.88160200  | -2.36558700  |
| C                                            | 4.17930100     | -3.68650100 | -0.81877300  |
| C                                            | 4.63427100     | -2.22593300 | -0.97832800  |
| C                                            | 3.11103100     | -2.12165400 | 0.71312800   |
| C                                            | 3.07821500     | -3.60207300 | 0.27539100   |
| H                                            | 3.85497200     | -4.12178800 | -1.76463700  |
| H                                            | 5.02608400     | -4.29282900 | -0.48529300  |
| H                                            | 2.08523500     | -3.89334200 | -0.08065700  |
| H                                            | 3.29892100     | -4.25779500 | 1.11996600   |
| C                                            | 4.60290100     | -1.73614000 | 0.50536100   |



|    |             |             |             |
|----|-------------|-------------|-------------|
| C  | 3.46196700  | -1.41005200 | -1.58371300 |
| H  | 3.82039400  | -0.40885300 | -1.83657800 |
| C  | 2.44058900  | -1.28422200 | -0.39277600 |
| H  | 2.33832300  | -0.23969700 | -0.08438700 |
| H  | 2.65975000  | -1.93646500 | 1.68735300  |
| C  | 0.80478600  | -2.36851400 | -1.94596200 |
| C  | 1.89260500  | -2.79984400 | -2.86644100 |
| C  | -0.06984100 | -1.45971500 | -0.14788200 |
| H  | 1.51290400  | -2.80693400 | -3.88951400 |
| N  | 1.09279600  | -1.69961200 | -0.78980900 |
| O  | 2.97037800  | -1.89008400 | -2.83079200 |
| H  | 2.19072500  | -3.82178700 | -2.60882400 |
| N  | -0.47055100 | -2.56717200 | -2.07993600 |
| N  | -0.99924100 | -1.99377200 | -0.95186100 |
| C  | -2.40989200 | -1.91017700 | -0.81932400 |
| C  | -3.08075200 | -2.67285600 | 0.13719800  |
| C  | -3.13615700 | -1.03168000 | -1.62830300 |
| C  | -4.44063000 | -2.49734100 | 0.35991500  |
| C  | -4.49821400 | -0.85225200 | -1.43188200 |
| C  | -5.12235600 | -1.57228500 | -0.41958300 |
| H  | -4.94888300 | -3.06608500 | 1.12839300  |
| H  | -5.05534600 | -0.15660900 | -2.04714300 |
| Cl | -2.34464400 | -0.13298800 | -2.87831200 |
| Cl | -6.81217700 | -1.30339200 | -0.11904200 |
| Cl | -2.21104600 | -3.84527000 | 1.05987200  |
| C  | 5.92347800  | -2.05555300 | -1.75712800 |
| H  | 6.23001900  | -1.00516900 | -1.80083400 |
| H  | 6.73472300  | -2.63220900 | -1.30204800 |
| H  | 5.79284200  | -2.40968000 | -2.78462500 |
| C  | 5.54363600  | -2.49987300 | 1.44387400  |
| H  | 6.58620100  | -2.34894900 | 1.14433100  |
| H  | 5.43293400  | -2.11077600 | 2.46089800  |
| H  | 5.35554100  | -3.57334900 | 1.48183700  |
| C  | 4.94379500  | -0.24890800 | 0.66969400  |
| H  | 4.78232000  | 0.06546500  | 1.70630800  |
| H  | 6.00245000  | -0.08710200 | 0.44104300  |
| H  | 4.36880200  | 0.42135600  | 0.02719200  |
| N  | 1.64726800  | 2.17042400  | 1.76359600  |
| C  | 0.41945500  | 2.85266200  | 2.12069400  |
| H  | 0.21281000  | 3.58496500  | 1.32748300  |
| H  | -0.40093600 | 2.11876800  | 2.09753200  |
| C  | 0.37910600  | 3.55955300  | 3.48111400  |
| H  | -0.58732500 | 4.05503900  | 3.61736800  |
| H  | 0.49581700  | 2.83702600  | 4.29438500  |

|   |            |            |             |
|---|------------|------------|-------------|
| H | 1.16870600 | 4.30965600 | 3.57530200  |
| C | 2.14376100 | 1.17849200 | 2.70270000  |
| H | 2.58407200 | 0.34685600 | 2.13282400  |
| H | 1.27537400 | 0.73799000 | 3.20915200  |
| C | 3.17470700 | 1.65132400 | 3.73240500  |
| H | 2.78490500 | 2.45241100 | 4.36679600  |
| H | 3.47241700 | 0.81637000 | 4.37476000  |
| H | 4.07758900 | 2.02450500 | 3.23675100  |
| C | 2.62181700 | 2.92238300 | 0.99488400  |
| H | 2.21924900 | 3.07393200 | -0.01728900 |
| H | 3.50616200 | 2.28400200 | 0.88224800  |
| C | 3.05036400 | 4.28634400 | 1.54864700  |
| H | 3.46211500 | 4.20297800 | 2.55824600  |
| H | 3.81113000 | 4.73162900 | 0.89976600  |
| H | 2.20201500 | 4.97745500 | 1.58100700  |

### **Si-M01<sup>B</sup>**

Total Energy= -3452.07351575

Sum of electronic and zero-point Energies= -3451.256027

Sum of electronic and thermal Energies= -3451.207227

Sum of electronic and thermal Enthalpies= -3451.206283

Sum of electronic and thermal Free Energies= -3451.340456

|   |             |             |             |
|---|-------------|-------------|-------------|
| C | 0.60512400  | -3.11730000 | 2.61560600  |
| C | 0.35950500  | -1.94606500 | 1.90417200  |
| C | 1.40435800  | -1.06731400 | 1.57751300  |
| C | 2.69760600  | -1.40943200 | 1.95078000  |
| C | 2.96822500  | -2.59466500 | 2.63778000  |
| C | 1.91681000  | -3.43666300 | 2.97655000  |
| H | -0.20409200 | -3.78263800 | 2.89377700  |
| H | 3.50757800  | -0.73242900 | 1.68535900  |
| H | 3.98673800  | -2.84901200 | 2.91209000  |
| H | 2.10486400  | -4.35411100 | 3.52518600  |
| C | 1.10169200  | 0.29911600  | 0.93446500  |
| O | -0.86557700 | -1.57645500 | 1.42924500  |
| C | -1.94670700 | -2.46472500 | 1.52410400  |
| H | -1.63766700 | -3.50715600 | 1.35414100  |
| H | -2.41890400 | -2.39983800 | 2.51080100  |
| C | -2.91060000 | -2.09658900 | 0.39837700  |
| O | -2.47197600 | -1.59199500 | -0.61531000 |
| C | -4.36560700 | -2.37674400 | 0.55014500  |
| C | -4.87783800 | -3.16940900 | 1.58127300  |
| C | -5.23082600 | -1.81462300 | -0.39684400 |
| C | -6.24762100 | -3.40221000 | 1.66086200  |
| H | -4.21825100 | -3.61916300 | 2.31701400  |

|    |             |             |             |
|----|-------------|-------------|-------------|
| C  | -6.59856000 | -2.03609800 | -0.30382600 |
| H  | -4.80582000 | -1.20125300 | -1.18779700 |
| C  | -7.10641900 | -2.83230000 | 0.72339500  |
| H  | -6.64449800 | -4.02463600 | 2.45561700  |
| H  | -7.27162800 | -1.59273300 | -1.03008700 |
| H  | -8.17503100 | -3.00834400 | 0.79369700  |
| C  | -2.74294600 | 3.58422900  | -1.87080100 |
| C  | -3.54465000 | 2.88555100  | -0.75839300 |
| C  | -1.41949800 | 2.88583600  | 0.04862800  |
| C  | -1.27607400 | 3.50837400  | -1.35662300 |
| H  | -2.90728500 | 3.11448100  | -2.84232400 |
| H  | -3.07698600 | 4.62091100  | -1.97038200 |
| H  | -0.62402900 | 2.90725500  | -2.00004500 |
| H  | -0.81869400 | 4.49939200  | -1.30612800 |
| C  | -2.80720800 | 3.39603300  | 0.51986700  |
| C  | -3.13878300 | 1.38572200  | -0.77682800 |
| H  | -3.82087100 | 0.80568400  | -0.14662000 |
| C  | -1.72183900 | 1.39095000  | -0.10412700 |
| H  | -1.73310600 | 0.91837900  | 0.87582100  |
| H  | -0.58569600 | 3.04232900  | 0.73411700  |
| C  | -0.96064200 | 0.15814000  | -2.13427100 |
| C  | -2.16444100 | 0.59333400  | -2.89643600 |
| C  | 0.38915900  | 0.04703100  | -0.42054400 |
| H  | -2.42400200 | -0.18613500 | -3.61491100 |
| N  | -0.73913000 | 0.61790000  | -0.86540600 |
| O  | -3.28406900 | 0.77830500  | -2.05868500 |
| H  | -1.91812400 | 1.50516200  | -3.45578300 |
| N  | -0.02352600 | -0.65144800 | -2.52763800 |
| N  | 0.81255900  | -0.70063300 | -1.44430500 |
| C  | 1.96600000  | -1.52452600 | -1.42694800 |
| C  | 3.23622700  | -0.96968700 | -1.58836100 |
| C  | 1.84328700  | -2.89316100 | -1.17264500 |
| C  | 4.37571100  | -1.75205200 | -1.44465100 |
| C  | 2.96689000  | -3.69383400 | -1.03051500 |
| C  | 4.21912400  | -3.10148500 | -1.15349400 |
| H  | 5.35968700  | -1.31422800 | -1.55734800 |
| H  | 2.86602700  | -4.75075000 | -0.81792900 |
| Cl | 0.27142700  | -3.59597300 | -1.02345700 |
| Cl | 5.63602100  | -4.08604500 | -0.94735400 |
| Cl | 3.40001500  | 0.71044800  | -1.96480800 |
| C  | -5.04482100 | 3.08582900  | -0.83749000 |
| H  | -5.55196600 | 2.60733200  | 0.00744800  |
| H  | -5.30265000 | 4.14947200  | -0.83598600 |
| H  | -5.43765900 | 2.64484200  | -1.75936800 |

|   |             |            |             |
|---|-------------|------------|-------------|
| C | -2.84009600 | 4.91480300 | 0.71256500  |
| H | -3.86953400 | 5.26374600 | 0.84617600  |
| H | -2.28292400 | 5.17593800 | 1.61831800  |
| H | -2.39919400 | 5.47268500 | -0.11516300 |
| C | -3.30573300 | 2.77026100 | 1.83093300  |
| H | -4.23163900 | 3.26028500 | 2.14856400  |
| H | -3.51230500 | 1.69965500 | 1.77081800  |
| H | -2.56120200 | 2.91775100 | 2.61996200  |
| N | 3.45953800  | 2.96016100 | 0.66540300  |
| C | 4.72621600  | 3.47271200 | 0.18706700  |
| H | 5.51734000  | 2.95010300 | 0.73942000  |
| H | 4.84467900  | 3.17832200 | -0.86758300 |
| C | 4.95788300  | 4.98776900 | 0.27598800  |
| H | 5.96209900  | 5.23746900 | -0.08142400 |
| H | 4.24090700  | 5.52632800 | -0.35141300 |
| H | 4.85429700  | 5.35593000 | 1.30008100  |
| C | 2.25559100  | 3.52155000 | 0.08120700  |
| H | 1.49432200  | 2.72984300 | 0.03079700  |
| H | 2.49701900  | 3.80423200 | -0.95260900 |
| C | 1.62847600  | 4.71658700 | 0.81135100  |
| H | 2.33797300  | 5.53912500 | 0.93798500  |
| H | 0.76080400  | 5.09120000 | 0.25729800  |
| H | 1.27728400  | 4.41070200 | 1.80208200  |
| C | 3.38351600  | 2.53160800 | 2.05197000  |
| H | 4.02377000  | 1.64289800 | 2.17095000  |
| H | 2.35178200  | 2.19745200 | 2.22724500  |
| C | 3.80747200  | 3.54977300 | 3.11908200  |
| H | 3.67702900  | 3.12101900 | 4.11791400  |
| H | 4.86330000  | 3.81980300 | 3.01196600  |
| H | 3.21674300  | 4.46824300 | 3.06212100  |
| O | 0.42729000  | 1.13941600 | 1.70617300  |
| H | 2.10346100  | 0.66715200 | 0.57857500  |

**Re-M01<sup>BA</sup>**

Total Energy= -3452.56419892

Sum of electronic and zero-point Energies= -3451.732028

Sum of electronic and thermal Energies= -3451.683376

Sum of electronic and thermal Enthalpies= -3451.682432

Sum of electronic and thermal Free Energies= -3451.815123

|   |             |            |            |
|---|-------------|------------|------------|
| C | -3.32974300 | 1.91985900 | 0.97233600 |
| C | -2.20631000 | 1.15409800 | 0.68881600 |
| C | -1.72382900 | 0.20259800 | 1.59133000 |
| C | -2.36794500 | 0.04478900 | 2.81366500 |
| C | -3.49806900 | 0.80599800 | 3.11222100 |

|   |             |             |             |
|---|-------------|-------------|-------------|
| C | -3.97512100 | 1.73879800  | 2.19568400  |
| H | -3.69736200 | 2.63180100  | 0.23989900  |
| H | -1.97975800 | -0.66087300 | 3.54070900  |
| H | -3.99773900 | 0.67407500  | 4.06526200  |
| H | -4.85614000 | 2.32752900  | 2.42754100  |
| C | -0.44494800 | -0.53783100 | 1.25000500  |
| O | -0.01355400 | -1.40793200 | 2.26656000  |
| H | 0.34620900  | 0.22394000  | 1.13471600  |
| O | -1.55674600 | 1.19528100  | -0.51484800 |
| C | -1.03974600 | 2.41370100  | -0.99658900 |
| H | -1.57638000 | 2.71420500  | -1.90540600 |
| H | -1.14921700 | 3.21045000  | -0.25237300 |
| C | 0.43534700  | 2.19608400  | -1.33816600 |
| O | 0.93870400  | 1.09714700  | -1.19654500 |
| C | 1.20948100  | 3.35510400  | -1.86074000 |
| C | 0.67863200  | 4.64928200  | -1.88729900 |
| C | 2.51045800  | 3.12764900  | -2.32440300 |
| C | 1.44740200  | 5.70565500  | -2.36631400 |
| H | -0.32950200 | 4.84673700  | -1.53607000 |
| C | 3.27399900  | 4.18266100  | -2.80448600 |
| H | 2.90181400  | 2.11544200  | -2.30196000 |
| C | 2.74227200  | 5.47290300  | -2.82331200 |
| H | 1.03589400  | 6.70890800  | -2.38278600 |
| H | 4.28097800  | 4.00426400  | -3.16612600 |
| H | 3.33938800  | 6.29864700  | -3.19630000 |
| C | 3.46507800  | -4.25066200 | -0.64608800 |
| C | 4.12579500  | -2.86326100 | -0.69287100 |
| C | 2.54365500  | -2.63466200 | 0.92741400  |
| C | 2.32068800  | -4.06759200 | 0.39194100  |
| H | 3.14223900  | -4.58788500 | -1.63092000 |
| H | 4.19532800  | -4.98762600 | -0.30207500 |
| H | 1.32134500  | -4.19733500 | -0.03650100 |
| H | 2.39472100  | -4.79484300 | 1.20247900  |
| C | 4.08465200  | -2.46169200 | 0.81517200  |
| C | 3.10897400  | -1.86009900 | -1.30210700 |
| H | 3.61084000  | -0.91126000 | -1.50866900 |
| C | 2.07505500  | -1.62638900 | -0.13867800 |
| H | 2.14189100  | -0.59727800 | 0.22635300  |
| H | 2.11374000  | -2.44102700 | 1.91053000  |
| C | 0.35016100  | -2.39434400 | -1.78126400 |
| C | 1.39555900  | -2.97743400 | -2.66717500 |
| C | -0.43407900 | -1.29569100 | -0.06743000 |
| H | 1.05546800  | -2.91058800 | -3.70172500 |
| N | 0.69430800  | -1.77890500 | -0.61074500 |

|    |             |             |             |
|----|-------------|-------------|-------------|
| O  | 2.58504800  | -2.22433600 | -2.57321200 |
| H  | 1.53209700  | -4.03544400 | -2.42290500 |
| N  | -0.93403900 | -2.35573000 | -1.97700300 |
| N  | -1.41123200 | -1.67762900 | -0.89639400 |
| C  | -2.80546600 | -1.40941500 | -0.80511700 |
| C  | -3.55732800 | -1.92845100 | 0.24983500  |
| C  | -3.42985400 | -0.59141800 | -1.75272200 |
| C  | -4.88479000 | -1.56945400 | 0.42882800  |
| C  | -4.76426400 | -0.23950200 | -1.60265200 |
| C  | -5.46498400 | -0.71282400 | -0.49930600 |
| H  | -5.45055100 | -1.95633900 | 1.26721400  |
| H  | -5.24049500 | 0.40791700  | -2.32865100 |
| Cl | -2.55870100 | 0.02423000  | -3.11221800 |
| Cl | -7.11234800 | -0.22544100 | -0.27607700 |
| Cl | -2.84276000 | -3.05585100 | 1.35842400  |
| C  | 5.46774000  | -2.82715900 | -1.39640300 |
| H  | 5.91921100  | -1.83108900 | -1.34006700 |
| H  | 6.16221100  | -3.54631500 | -0.95229600 |
| H  | 5.34662100  | -3.08319600 | -2.45348200 |
| C  | 4.84932100  | -3.40553800 | 1.74931600  |
| H  | 5.91118300  | -3.42058100 | 1.48380000  |
| H  | 4.77233900  | -3.03770600 | 2.77717300  |
| H  | 4.48411300  | -4.43278500 | 1.73968600  |
| C  | 4.60845500  | -1.04861100 | 1.09734400  |
| H  | 4.30308700  | -0.72669300 | 2.09970600  |
| H  | 5.70239500  | -1.04990300 | 1.07379900  |
| H  | 4.27514400  | -0.29126700 | 0.38469700  |
| N  | 1.63689500  | 1.96688000  | 1.96831300  |
| H  | -0.69283500 | -2.08263500 | 2.41313000  |
| C  | 0.65710400  | 3.04558800  | 1.99540100  |
| H  | 0.77349100  | 3.60618500  | 1.05796000  |
| H  | -0.34693500 | 2.59569800  | 1.97286400  |
| C  | 0.69360600  | 4.02363900  | 3.17472700  |
| H  | -0.06264200 | 4.80062100  | 3.02874400  |
| H  | 0.46147100  | 3.51100500  | 4.11240200  |
| H  | 1.66737700  | 4.50670900  | 3.27967400  |
| C  | 1.72914300  | 1.14802800  | 3.17216000  |
| H  | 2.02110400  | 0.13124800  | 2.86708400  |
| H  | 0.71341100  | 1.05156700  | 3.57907800  |
| C  | 2.69488700  | 1.60971900  | 4.26887200  |
| H  | 2.45201500  | 2.60737200  | 4.64157200  |
| H  | 2.66025200  | 0.91159800  | 5.11048700  |
| H  | 3.72505200  | 1.62787900  | 3.89895200  |
| C  | 2.90119900  | 2.25774500  | 1.29879100  |

|   |            |            |            |
|---|------------|------------|------------|
| H | 2.73769100 | 2.20754600 | 0.21405400 |
| H | 3.58454700 | 1.43862700 | 1.54315800 |
| C | 3.58907300 | 3.58890200 | 1.61580000 |
| H | 3.81817800 | 3.69102800 | 2.68019400 |
| H | 4.52634200 | 3.65488200 | 1.05515300 |
| H | 2.96843700 | 4.43858900 | 1.31399700 |

**Si-M01<sup>BA</sup>**

Total Energy= -3452.56669796

Sum of electronic and zero-point Energies= -3451.734015

Sum of electronic and thermal Energies= -3451.686075

Sum of electronic and thermal Enthalpies= -3451.685131

Sum of electronic and thermal Free Energies= -3451.816082

|   |             |             |             |
|---|-------------|-------------|-------------|
| C | 0.77053800  | -2.84467400 | 2.50446400  |
| C | 0.44664500  | -1.69588900 | 1.78546000  |
| C | 1.46141300  | -0.85344800 | 1.30857800  |
| C | 2.79195600  | -1.17666300 | 1.55191500  |
| C | 3.12761400  | -2.33635100 | 2.24709600  |
| C | 2.11214200  | -3.15905500 | 2.72167400  |
| H | -0.00178000 | -3.49404400 | 2.89820600  |
| H | 3.56624200  | -0.51266400 | 1.17918200  |
| H | 4.16769700  | -2.58742000 | 2.42175500  |
| H | 2.35645500  | -4.05923600 | 3.27571300  |
| C | 1.10819600  | 0.42433300  | 0.57735300  |
| O | -0.81730800 | -1.31012300 | 1.46168500  |
| C | -1.88447400 | -2.19003400 | 1.72280100  |
| H | -1.60742800 | -3.23242300 | 1.51471000  |
| H | -2.19673900 | -2.12067400 | 2.77192300  |
| C | -3.02418000 | -1.81998700 | 0.78395300  |
| O | -2.82332000 | -1.05497600 | -0.13800600 |
| C | -4.35809700 | -2.43655500 | 1.01134000  |
| C | -4.57926300 | -3.39478200 | 2.00602300  |
| C | -5.41090400 | -2.03170400 | 0.18281300  |
| C | -5.84711000 | -3.94395000 | 2.16867100  |
| H | -3.77295100 | -3.72430700 | 2.65416100  |
| C | -6.67606400 | -2.57798900 | 0.35204100  |
| H | -5.21209100 | -1.28733600 | -0.58254100 |
| C | -6.89340800 | -3.53456800 | 1.34482500  |
| H | -6.01807500 | -4.68938100 | 2.93755300  |
| H | -7.49428100 | -2.26290900 | -0.28659500 |
| H | -7.88190700 | -3.96274900 | 1.47580200  |
| C | -2.84048900 | 3.80583100  | -2.08976900 |
| C | -3.58127500 | 3.26325600  | -0.85599300 |
| C | -1.39808800 | 3.19102600  | -0.22868800 |

|    |             |             |             |
|----|-------------|-------------|-------------|
| C  | -1.34205500 | 3.67691700  | -1.69326300 |
| H  | -3.11655700 | 3.26522100  | -2.99648000 |
| H  | -3.11755000 | 4.84975100  | -2.25860400 |
| H  | -0.78425400 | 2.98379000  | -2.33255500 |
| H  | -0.82321000 | 4.63506100  | -1.76268100 |
| C  | -2.70816300 | 3.83318100  | 0.30592300  |
| C  | -3.27156500 | 1.74443300  | -0.76679900 |
| H  | -3.91900000 | 1.26686800  | -0.02697100 |
| C  | -1.79979100 | 1.71028100  | -0.21274100 |
| H  | -1.79287900 | 1.31059000  | 0.79898800  |
| H  | -0.50100800 | 3.38987800  | 0.35936600  |
| C  | -1.30650700 | 0.24770700  | -2.17115800 |
| C  | -2.53911500 | 0.70823700  | -2.86959900 |
| C  | 0.19794300  | 0.18626900  | -0.60282700 |
| H  | -2.90502600 | -0.10344400 | -3.50052500 |
| N  | -0.93000100 | 0.80220700  | -0.97528200 |
| O  | -3.56462700 | 1.03433900  | -1.96325200 |
| H  | -2.27462800 | 1.55250300  | -3.51925000 |
| N  | -0.46202000 | -0.65529900 | -2.57207700 |
| N  | 0.47459800  | -0.67497400 | -1.58337000 |
| C  | 1.60497200  | -1.53472100 | -1.64296200 |
| C  | 2.86084500  | -1.02234000 | -1.96835000 |
| C  | 1.47594700  | -2.88333200 | -1.30210200 |
| C  | 3.99312700  | -1.82244100 | -1.89407800 |
| C  | 2.59354400  | -3.70111900 | -1.22619000 |
| C  | 3.83998100  | -3.14942900 | -1.50693200 |
| H  | 4.96897400  | -1.41863000 | -2.13470600 |
| H  | 2.49388700  | -4.74276100 | -0.94719100 |
| Cl | -0.08926900 | -3.53562000 | -0.96964200 |
| Cl | 5.24687200  | -4.15205500 | -1.38286900 |
| Cl | 3.01185800  | 0.63159100  | -2.46527600 |
| C  | -5.06786000 | 3.55654400  | -0.82920900 |
| H  | -5.52518700 | 3.19618800  | 0.09836700  |
| H  | -5.25817100 | 4.63072900  | -0.91344000 |
| H  | -5.56613900 | 3.05852100  | -1.66674000 |
| C  | -2.63566500 | 5.36225900  | 0.35501300  |
| H  | -3.63057300 | 5.78322700  | 0.53104000  |
| H  | -1.99689500 | 5.66957600  | 1.18906200  |
| H  | -2.23437200 | 5.81423300  | -0.55285800 |
| C  | -3.13363500 | 3.36313400  | 1.70457800  |
| H  | -4.00697700 | 3.93463900  | 2.03310400  |
| H  | -3.40218000 | 2.30638100  | 1.76749300  |
| H  | -2.32905300 | 3.54668300  | 2.42410900  |
| N  | 3.52360800  | 2.35013800  | 1.35357200  |



|   |            |            |             |
|---|------------|------------|-------------|
| C | 4.77460400 | 1.74651400 | 0.89653500  |
| H | 5.10814200 | 1.05998400 | 1.68422600  |
| H | 4.55032800 | 1.12385700 | 0.01697800  |
| C | 5.92392100 | 2.68348900 | 0.51355600  |
| H | 6.79757300 | 2.08949400 | 0.23037600  |
| H | 5.65532500 | 3.30175100 | -0.34762800 |
| H | 6.21176700 | 3.34423900 | 1.33411000  |
| C | 2.97904600 | 3.39997500 | 0.49314400  |
| H | 1.88229700 | 3.34574500 | 0.55035600  |
| H | 3.23874200 | 3.13156500 | -0.53824700 |
| C | 3.39474700 | 4.84672200 | 0.77185300  |
| H | 4.47665000 | 4.98369300 | 0.71293200  |
| H | 2.92528600 | 5.50872600 | 0.03853900  |
| H | 3.06302300 | 5.16730400 | 1.76364200  |
| C | 3.41841500 | 2.56647100 | 2.79653100  |
| H | 3.29965100 | 1.58254800 | 3.27299600  |
| H | 2.48331400 | 3.11600300 | 2.97502300  |
| C | 4.56518000 | 3.29869500 | 3.49986000  |
| H | 4.32605200 | 3.41813200 | 4.56027900  |
| H | 5.49355600 | 2.72445800 | 3.43440900  |
| H | 4.74254100 | 4.28859000 | 3.07378300  |
| O | 0.49562300 | 1.37304800 | 1.41402400  |
| H | 2.04021400 | 0.83962700 | 0.16449500  |
| H | 1.21571900 | 1.80156500 | 1.89916900  |

### **Re-TS2<sup>D</sup>**

Total Energy= -3159.72343513

Sum of electronic and zero-point Energies= -3159.119805

Sum of electronic and thermal Energies= -3159.082196

Sum of electronic and thermal Enthalpies= -3159.081251

Sum of electronic and thermal Free Energies= -3159.188686

|   |             |             |             |
|---|-------------|-------------|-------------|
| C | 3.61209800  | 2.20502500  | -0.90313100 |
| C | 2.34374300  | 1.68214800  | -0.68361700 |
| C | 1.72608700  | 0.84457700  | -1.62225200 |
| C | 2.37637300  | 0.62700500  | -2.83957200 |
| C | 3.64348200  | 1.15316100  | -3.07449600 |
| C | 4.27179100  | 1.92680800  | -2.09904300 |
| H | 4.06017700  | 2.82824100  | -0.13575100 |
| H | 1.86558200  | 0.01550100  | -3.57626200 |
| H | 4.14452600  | 0.95646700  | -4.01704000 |
| H | 5.26278400  | 2.33325500  | -2.27413600 |
| C | 0.40485000  | 0.22016500  | -1.35440800 |
| O | -0.38751700 | -0.14335400 | -2.52017700 |
| H | -0.56930600 | 0.82155500  | -1.62195600 |

|   |              |              |              |
|---|--------------|--------------|--------------|
| O | 1. 70315100  | 1. 96707200  | 0. 50819100  |
| C | 0. 57141500  | 2. 80622900  | 0. 37130900  |
| H | 0. 74029900  | 3. 72840400  | 0. 94579300  |
| H | 0. 42965300  | 3. 09906800  | -0. 67242600 |
| C | -0. 68744100 | 2. 16682800  | 0. 93416900  |
| O | -0. 63637200 | 1. 23853200  | 1. 71732800  |
| C | -2. 00372700 | 2. 78958700  | 0. 57692800  |
| C | -2. 23466700 | 3. 44756000  | -0. 63619900 |
| C | -3. 04531600 | 2. 66860600  | 1. 50614400  |
| C | -3. 49380500 | 3. 97511400  | -0. 91333300 |
| H | -1. 45138200 | 3. 53708800  | -1. 38209500 |
| C | -4. 29617600 | 3. 20857700  | 1. 23284300  |
| H | -2. 84964600 | 2. 15151600  | 2. 44060700  |
| C | -4. 52099700 | 3. 86230900  | 0. 02066700  |
| H | -3. 67123100 | 4. 47151100  | -1. 86131500 |
| H | -5. 09510500 | 3. 12010800  | 1. 96176500  |
| H | -5. 49863200 | 4. 28061500  | -0. 19615600 |
| C | -4. 17435600 | -3. 04320000 | 0. 07035000  |
| C | -4. 53439600 | -1. 55479600 | 0. 21057100  |
| C | -2. 89660900 | -1. 54915500 | -1. 36910300 |
| C | -2. 99266100 | -3. 02883900 | -0. 94062600 |
| H | -3. 94130100 | -3. 49374100 | 1. 03684000  |
| H | -5. 03160500 | -3. 59445100 | -0. 32594900 |
| H | -2. 04995600 | -3. 38098600 | -0. 50903700 |
| H | -3. 19256100 | -3. 67068300 | -1. 80133500 |
| C | -4. 36522400 | -1. 05422500 | -1. 26006600 |
| C | -3. 34130200 | -0. 85596300 | 0. 91491400  |
| H | -3. 63080400 | 0. 15667400  | 1. 20947100  |
| C | -2. 26527100 | -0. 74741600 | -0. 22240800 |
| H | -2. 16960500 | 0. 30136000  | -0. 51558300 |
| H | -2. 38247700 | -1. 36953600 | -2. 31304700 |
| C | -0. 70959600 | -1. 78276600 | 1. 40923500  |
| C | -1. 85631200 | -2. 35614700 | 2. 16359100  |
| C | 0. 25051900  | -0. 63652700 | -0. 21003200 |
| H | -1. 56724100 | -2. 48994300 | 3. 20686200  |
| N | -0. 93904600 | -1. 13902100 | 0. 22475700  |
| O | -2. 95035000 | -1. 45963300 | 2. 14429500  |
| H | -2. 11485900 | -3. 33701500 | 1. 74760900  |
| N | 0. 54070900  | -1. 77476700 | 1. 73837400  |
| N | 1. 14023700  | -1. 07461300 | 0. 71774800  |
| C | 2. 54894500  | -0. 98248500 | 0. 67730500  |
| C | 3. 26185200  | -1. 53973000 | -0. 39080300 |
| C | 3. 25832500  | -0. 32485400 | 1. 68828600  |
| C | 4. 63204700  | -1. 36146200 | -0. 51395200 |

|    |             |             |             |
|----|-------------|-------------|-------------|
| C  | 4.63446400  | -0.15576000 | 1.59438500  |
| C  | 5.29549300  | -0.65235900 | 0.47913200  |
| H  | 5.16505200  | -1.77356600 | -1.36174800 |
| H  | 5.17202100  | 0.37128400  | 2.37280900  |
| Cl | 2.44452600  | 0.30797900  | 3.07513400  |
| Cl | 7.00656700  | -0.38829300 | 0.32436500  |
| Cl | 2.43529500  | -2.48908400 | -1.58342200 |
| C  | -5.85649700 | -1.27898000 | 0.89870800  |
| H  | -6.07375300 | -0.20490500 | 0.91486500  |
| H  | -6.68090100 | -1.78987100 | 0.39172300  |
| H  | -5.82593800 | -1.63200800 | 1.93445500  |
| C  | -5.29542400 | -1.73305500 | -2.26939900 |
| H  | -6.34223600 | -1.53146100 | -2.01866200 |
| H  | -5.11131800 | -1.32119100 | -3.26677500 |
| H  | -5.16488200 | -2.81446000 | -2.33103800 |
| C  | -4.54523700 | 0.46163000  | -1.43463300 |
| H  | -4.09961100 | 1.06850800  | -0.64236100 |
| H  | -4.10624600 | 0.78440300  | -2.38509400 |
| H  | -5.61151700 | 0.71025200  | -1.46036000 |

### Si-TS2<sup>D</sup>

Total Energy= -3159.71344623

Sum of electronic and zero-point Energies= -3159.110164

Sum of electronic and thermal Energies= -3159.071861

Sum of electronic and thermal Enthalpies= -3159.070917

Sum of electronic and thermal Free Energies= -3159.183128

|   |             |             |             |
|---|-------------|-------------|-------------|
| C | 3.21052500  | 0.05951800  | 1.49300300  |
| C | 2.01804900  | 0.44309500  | 0.88705400  |
| C | 0.77605600  | 0.12950200  | 1.45808700  |
| C | 0.76862000  | -0.54484700 | 2.68128800  |
| C | 1.95589000  | -0.92203100 | 3.30536200  |
| C | 3.17654900  | -0.62787400 | 2.70505800  |
| H | 4.14937200  | 0.28919400  | 0.99877800  |
| H | -0.18756800 | -0.79867600 | 3.13170400  |
| H | 1.92500000  | -1.45865100 | 4.24792100  |
| H | 4.10562700  | -0.93373800 | 3.17524000  |
| C | -0.50669200 | 0.47922500  | 0.77367400  |
| O | -1.12329900 | 1.74799500  | 1.11421300  |
| H | -0.54827300 | 1.35092200  | -0.01731100 |
| O | 2.06150700  | 1.07472900  | -0.34040700 |
| C | 1.89801600  | 2.48618100  | -0.26798700 |
| H | 1.71240200  | 2.82718500  | -1.29276500 |
| H | 1.04199600  | 2.75392100  | 0.36265000  |
| C | 3.13133900  | 3.20294200  | 0.28061700  |

|    |             |             |             |
|----|-------------|-------------|-------------|
| O  | 2.98339600  | 4.12699400  | 1.05638100  |
| C  | 4.49158000  | 2.77219000  | -0.16549100 |
| C  | 4.69179400  | 1.94179900  | -1.27433600 |
| C  | 5.59238900  | 3.23675600  | 0.56115800  |
| C  | 5.98324500  | 1.57872300  | -1.64405500 |
| H  | 3.84317200  | 1.57025000  | -1.83782900 |
| C  | 6.88003100  | 2.86530600  | 0.19516700  |
| H  | 5.41491500  | 3.88366900  | 1.41416000  |
| C  | 7.07541100  | 2.03435900  | -0.90775700 |
| H  | 6.13767600  | 0.93418900  | -2.50330000 |
| H  | 7.73138700  | 3.21918900  | 0.76719100  |
| H  | 8.08059300  | 1.74096300  | -1.19339300 |
| C  | -5.71101400 | 0.61092500  | -1.66114900 |
| C  | -5.97562400 | 0.81745000  | -0.16105000 |
| C  | -3.84923500 | 1.57725100  | -0.42712800 |
| C  | -4.22538300 | 1.04266400  | -1.82538300 |
| H  | -5.92749400 | -0.41130900 | -1.97516100 |
| H  | -6.37732000 | 1.25420400  | -2.24235700 |
| H  | -3.56986500 | 0.22125300  | -2.13425100 |
| H  | -4.11491300 | 1.82111000  | -2.58326700 |
| C  | -5.19467200 | 2.14471900  | 0.10598600  |
| C  | -5.11017200 | -0.21103900 | 0.61799800  |
| H  | -5.42345000 | -0.22610800 | 1.66557100  |
| C  | -3.66463800 | 0.38962700  | 0.53105300  |
| H  | -3.33495700 | 0.75900900  | 1.49864300  |
| H  | -2.99311300 | 2.25291700  | -0.39453600 |
| C  | -2.99066900 | -1.82456500 | -0.42317700 |
| C  | -4.41189000 | -2.14161200 | -0.74021200 |
| C  | -1.32696900 | -0.58769000 | 0.33766000  |
| H  | -4.55545100 | -3.22223100 | -0.69349400 |
| N  | -2.67717300 | -0.61024700 | 0.13514800  |
| O  | -5.28286400 | -1.56724300 | 0.21373600  |
| H  | -4.63366100 | -1.81307800 | -1.76166500 |
| N  | -1.95386400 | -2.57618000 | -0.60005600 |
| N  | -0.91034100 | -1.80766200 | -0.11868000 |
| C  | 0.42943700  | -2.13578800 | -0.42296800 |
| C  | 1.15855700  | -3.01548100 | 0.38269100  |
| C  | 1.06902600  | -1.53040500 | -1.50849000 |
| C  | 2.51015300  | -3.23671700 | 0.16101300  |
| C  | 2.42246300  | -1.72823600 | -1.74734000 |
| C  | 3.12445700  | -2.56734000 | -0.89258900 |
| H  | 3.07373300  | -3.89989000 | 0.80546500  |
| H  | 2.91540100  | -1.22923200 | -2.57236400 |
| Cl | 0.16408300  | -0.50140200 | -2.56794800 |

|    |             |             |             |
|----|-------------|-------------|-------------|
| Cl | 4.83017000  | -2.78550700 | -1.14455400 |
| Cl | 0.36578700  | -3.82827100 | 1.68687000  |
| C  | -7.43845800 | 0.76578700  | 0.23315100  |
| H  | -7.57057900 | 0.98485600  | 1.29824200  |
| H  | -8.02757800 | 1.48650000  | -0.34226300 |
| H  | -7.84572900 | -0.23206500 | 0.04165500  |
| C  | -5.69393100 | 3.34710000  | -0.70131700 |
| H  | -6.73811400 | 3.56529600  | -0.45371800 |
| H  | -5.10251300 | 4.23009500  | -0.43936400 |
| H  | -5.62357500 | 3.21298300  | -1.78157700 |
| C  | -5.17539400 | 2.57963100  | 1.57919500  |
| H  | -6.12352200 | 3.06425200  | 1.83221000  |
| H  | -5.03246700 | 1.76484200  | 2.29185300  |
| H  | -4.37518000 | 3.30830000  | 1.74408700  |

### **Re-TS2<sup>B</sup>**

Total Energy= -3452.04173442

Sum of electronic and zero-point Energies= -3451.227747

Sum of electronic and thermal Energies= -3451.180283

Sum of electronic and thermal Enthalpies= -3451.179339

Sum of electronic and thermal Free Energies= -3451.307769

|   |             |             |             |
|---|-------------|-------------|-------------|
| C | 2.81091600  | 1.38210700  | 2.29396800  |
| C | 1.72933100  | 0.74757400  | 1.68040300  |
| C | 0.40950200  | 1.16310100  | 1.93856800  |
| C | 0.22194000  | 2.17516100  | 2.88028700  |
| C | 1.29159800  | 2.82057100  | 3.49513100  |
| C | 2.58916700  | 2.42853000  | 3.19022000  |
| H | 3.82953100  | 1.07977700  | 2.08433900  |
| H | -0.81033800 | 2.43140000  | 3.09444600  |
| H | 1.11287300  | 3.61919000  | 4.20824100  |
| H | 3.43994600  | 2.91718300  | 3.65453900  |
| C | -0.84634300 | 0.56110700  | 1.33120200  |
| O | -1.96764000 | 0.71756800  | 2.03912100  |
| H | -0.63175400 | -0.80246900 | 1.40886400  |
| O | 1.88120000  | -0.29477600 | 0.79301700  |
| C | 3.18372200  | -0.79679200 | 0.65209500  |
| H | 3.85368300  | -0.03983900 | 0.22065300  |
| H | 3.60287900  | -1.08917900 | 1.62874900  |
| C | 3.17473400  | -2.02330900 | -0.24435200 |
| O | 2.13841400  | -2.57005900 | -0.56198800 |
| C | 4.49926100  | -2.54268900 | -0.70219700 |
| C | 5.71308400  | -2.01768400 | -0.24587100 |
| C | 4.50211500  | -3.59888000 | -1.61888500 |
| C | 6.91564800  | -2.54747100 | -0.70361600 |

|    |             |             |             |
|----|-------------|-------------|-------------|
| H  | 5.73532900  | -1.20235200 | 0.47062000  |
| C  | 5.70342400  | -4.12092100 | -2.08016600 |
| H  | 3.55031200  | -3.99258000 | -1.95944900 |
| C  | 6.91144000  | -3.59506600 | -1.62181100 |
| H  | 7.85519700  | -2.14159000 | -0.34433500 |
| H  | 5.70156600  | -4.93686800 | -2.79520300 |
| H  | 7.85082500  | -4.00247600 | -1.98147300 |
| C  | -5.55577000 | 0.82113300  | -2.02461800 |
| C  | -5.55877400 | -0.52204400 | -1.27620400 |
| C  | -4.35384400 | 0.83851700  | 0.09206800  |
| C  | -4.65706700 | 1.72565200  | -1.13320300 |
| H  | -5.21114200 | 0.70816700  | -3.05391300 |
| H  | -6.57628300 | 1.20948700  | -2.08517100 |
| H  | -3.73733500 | 2.04678100  | -1.63391800 |
| H  | -5.17701600 | 2.63933800  | -0.83633100 |
| C  | -5.62806100 | -0.04136900 | 0.21140600  |
| C  | -4.11755200 | -1.10041900 | -1.34768800 |
| H  | -4.13250100 | -2.14182900 | -1.00829600 |
| C  | -3.33178700 | -0.23396300 | -0.30714900 |
| H  | -3.09401100 | -0.82149100 | 0.57414200  |
| H  | -4.02157800 | 1.36322300  | 0.98890700  |
| C  | -1.73679400 | 0.26188200  | -2.14513400 |
| C  | -2.74541500 | -0.16418100 | -3.15731100 |
| C  | -0.94945900 | 0.64051800  | -0.10383000 |
| H  | -2.22809800 | -0.56079800 | -4.03252300 |
| N  | -2.05928500 | 0.23978300  | -0.81834200 |
| O  | -3.57182600 | -1.19879300 | -2.66108600 |
| H  | -3.32235300 | 0.71239900  | -3.47342000 |
| N  | -0.54255600 | 0.69885700  | -2.37061100 |
| N  | -0.05151600 | 0.97641300  | -1.09347300 |
| C  | 0.96950200  | 1.93825600  | -0.97092400 |
| C  | 0.73027500  | 3.17415500  | -0.35156400 |
| C  | 2.26134800  | 1.69410400  | -1.45034000 |
| C  | 1.75988300  | 4.06466100  | -0.07842700 |
| C  | 3.30546200  | 2.57894300  | -1.21180600 |
| C  | 3.04380700  | 3.73848300  | -0.49298800 |
| H  | 1.55583000  | 4.99720100  | 0.43290900  |
| H  | 4.30179800  | 2.36001500  | -1.57674900 |
| Cl | 2.59069700  | 0.26033300  | -2.36677500 |
| Cl | 4.35524900  | 4.82247800  | -0.12875200 |
| Cl | -0.89150600 | 3.64958600  | 0.04332900  |
| C  | -6.61105400 | -1.50643000 | -1.74630500 |
| H  | -6.60766000 | -2.41217800 | -1.13003500 |
| H  | -7.61158000 | -1.06502000 | -1.70227800 |

|   |             |             |             |
|---|-------------|-------------|-------------|
| H | -6.41807000 | -1.80273200 | -2.78244100 |
| C | -6.88299000 | 0.76740200  | 0.55648200  |
| H | -7.78281800 | 0.15987200  | 0.41156800  |
| H | -6.84830900 | 1.05707900  | 1.61164100  |
| H | -6.99306000 | 1.67991100  | -0.03092800 |
| C | -5.53568300 | -1.17371700 | 1.24710200  |
| H | -5.25517100 | -0.76379200 | 2.22359100  |
| H | -6.51101600 | -1.65848100 | 1.35698400  |
| H | -4.81631400 | -1.95839400 | 0.99927900  |
| N | -0.72714100 | -2.14340900 | 1.76776200  |
| C | 0.53662000  | -2.44725400 | 2.47729500  |
| H | 1.31348300  | -2.49836200 | 1.71252200  |
| H | 0.75464300  | -1.57324600 | 3.10345100  |
| C | 0.55390800  | -3.70245600 | 3.34660200  |
| H | 1.54424900  | -3.79929200 | 3.79993000  |
| H | -0.17400000 | -3.64176500 | 4.15952700  |
| H | 0.35581900  | -4.60981900 | 2.77234000  |
| C | -1.93916100 | -2.23613800 | 2.61799200  |
| H | -2.60623700 | -1.43020400 | 2.30396700  |
| H | -1.62674400 | -1.96228500 | 3.63015800  |
| C | -2.66952300 | -3.57583300 | 2.62756900  |
| H | -2.04637900 | -4.39691900 | 2.98939900  |
| H | -3.53961500 | -3.49409000 | 3.28540200  |
| H | -3.03842300 | -3.83928600 | 1.63113500  |
| C | -0.83253300 | -2.72554200 | 0.41031000  |
| H | -0.16780500 | -2.12649400 | -0.22344800 |
| H | -1.86048600 | -2.55621000 | 0.07002800  |
| C | -0.45637100 | -4.19352100 | 0.24761100  |
| H | -1.07171400 | -4.85768200 | 0.85800600  |
| H | -0.59040900 | -4.47086100 | -0.80161200 |
| H | 0.59606400  | -4.35328800 | 0.49214100  |

### Si-TS2<sup>B</sup>

Total Energy= -3452.02971057

Sum of electronic and zero-point Energies= -3451.216008

Sum of electronic and thermal Energies= -3451.168114

Sum of electronic and thermal Enthalpies= -3451.167170

Sum of electronic and thermal Free Energies= -3451.298062

|   |             |            |            |
|---|-------------|------------|------------|
| C | -0.83251900 | 3.14376300 | 2.18845200 |
| C | -0.42920200 | 1.88708400 | 1.74054400 |
| C | -1.37947600 | 0.89391000 | 1.41838200 |
| C | -2.72575300 | 1.21396600 | 1.56751100 |
| C | -3.14556900 | 2.47821700 | 1.99016900 |
| C | -2.19413400 | 3.43618100 | 2.30781800 |

|   |             |             |             |
|---|-------------|-------------|-------------|
| H | -0.10203000 | 3.90263200  | 2.44522500  |
| H | -3.47018700 | 0.46397800  | 1.31049200  |
| H | -4.20426400 | 2.70299400  | 2.07291100  |
| H | -2.49779700 | 4.42077200  | 2.64950100  |
| C | -0.87232900 | -0.46920200 | 0.97211100  |
| O | 0.87416700  | 1.54832500  | 1.52936000  |
| C | 1.82538800  | 2.57120200  | 1.51828800  |
| H | 1.45724600  | 3.46295800  | 0.98817000  |
| H | 2.10273800  | 2.87874700  | 2.53673100  |
| C | 3.05881100  | 2.07853300  | 0.77387000  |
| O | 3.06532700  | 1.00293700  | 0.21057200  |
| C | 4.24506200  | 2.98686900  | 0.73545600  |
| C | 4.22272200  | 4.26735800  | 1.29750800  |
| C | 5.40403900  | 2.52978200  | 0.10010600  |
| C | 5.34944700  | 5.08052400  | 1.22306500  |
| H | 3.33238300  | 4.64402700  | 1.79124200  |
| C | 6.52912800  | 3.34117100  | 0.03064900  |
| H | 5.40102400  | 1.53458400  | -0.33244900 |
| C | 6.50184600  | 4.61770600  | 0.59220300  |
| H | 5.32720200  | 6.07424300  | 1.65747300  |
| H | 7.42757200  | 2.98234600  | -0.46045100 |
| H | 7.38046200  | 5.25247200  | 0.53825400  |
| C | 2.51851200  | -4.40330300 | -1.55337100 |
| C | 3.42796400  | -3.26401200 | -1.05937700 |
| C | 1.64063800  | -3.15315800 | 0.33839900  |
| C | 1.25840600  | -4.27541100 | -0.64830800 |
| H | 2.31857300  | -4.32357000 | -2.62333900 |
| H | 3.01796500  | -5.36519100 | -1.40601200 |
| H | 0.35210200  | -4.01917000 | -1.20990300 |
| H | 1.04454800  | -5.21101000 | -0.12445200 |
| C | 3.17766900  | -3.31798500 | 0.48021100  |
| C | 2.73772600  | -1.92674400 | -1.44021400 |
| H | 3.42810400  | -1.09138800 | -1.28698200 |
| C | 1.57718100  | -1.80250300 | -0.38884800 |
| H | 1.79316100  | -1.00483000 | 0.31747400  |
| H | 1.07791100  | -3.12325800 | 1.27196500  |
| C | 0.12370800  | -1.38188100 | -2.36477500 |
| C | 1.08037000  | -2.10846400 | -3.24147200 |
| C | -0.63558500 | -0.57696000 | -0.43815700 |
| H | 0.98098100  | -1.73893000 | -4.26329500 |
| N | 0.30259200  | -1.41909800 | -1.00573100 |
| O | 2.40674200  | -1.83825400 | -2.82799800 |
| H | 0.85366300  | -3.18129200 | -3.23751500 |
| N | -0.84673700 | -0.61758600 | -2.73657600 |



|    |             |             |             |
|----|-------------|-------------|-------------|
| N  | -1.35257500 | -0.11972900 | -1.53790900 |
| C  | -2.11782500 | 1.06173700  | -1.57158800 |
| C  | -3.50256500 | 1.02551800  | -1.73866900 |
| C  | -1.51270800 | 2.31446500  | -1.40200100 |
| C  | -4.28283400 | 2.16882900  | -1.61374500 |
| C  | -2.26165600 | 3.47060000  | -1.24876800 |
| C  | -3.64609800 | 3.36948500  | -1.33079100 |
| H  | -5.35911900 | 2.11734200  | -1.72216800 |
| H  | -1.77893200 | 4.42450000  | -1.07545400 |
| Cl | 0.21771200  | 2.41598000  | -1.41934600 |
| Cl | -4.60764500 | 4.79988100  | -1.09158400 |
| Cl | -4.27472000 | -0.48067600 | -2.12592300 |
| C  | 4.86194800  | -3.34707700 | -1.54288100 |
| H  | 5.46792300  | -2.54000900 | -1.11679300 |
| H  | 5.31744000  | -4.30288000 | -1.26491400 |
| H  | 4.90153000  | -3.25756400 | -2.63334200 |
| C  | 3.57859900  | -4.64110200 | 1.14033600  |
| H  | 4.65647300  | -4.80855100 | 1.03845500  |
| H  | 3.35376800  | -4.59472100 | 2.21094900  |
| H  | 3.06293300  | -5.51260400 | 0.73379600  |
| C  | 3.87211000  | -2.20011000 | 1.27200400  |
| H  | 4.93463200  | -2.43722100 | 1.39241000  |
| H  | 3.80369300  | -1.21053500 | 0.81523300  |
| H  | 3.43287400  | -2.12994100 | 2.27283200  |
| N  | -2.70303300 | -2.35504100 | 1.53284500  |
| C  | -4.12242300 | -2.11845400 | 1.19572800  |
| H  | -4.52910200 | -1.46918900 | 1.97785000  |
| H  | -4.12939900 | -1.54039100 | 0.26631000  |
| C  | -5.01069200 | -3.34466600 | 1.01348600  |
| H  | -6.02620300 | -3.00858100 | 0.78739500  |
| H  | -4.67441400 | -3.95925300 | 0.17429300  |
| H  | -5.05123300 | -3.96972500 | 1.90766900  |
| C  | -2.01848400 | -3.39330100 | 0.72814200  |
| H  | -0.97293700 | -3.07204700 | 0.70059500  |
| H  | -2.41858100 | -3.31322500 | -0.28992800 |
| C  | -2.08534700 | -4.83027600 | 1.23103300  |
| H  | -3.10576200 | -5.20918100 | 1.31667400  |
| H  | -1.54539100 | -5.46813000 | 0.52521800  |
| H  | -1.59314600 | -4.92920400 | 2.20232100  |
| C  | -2.40436700 | -2.37193300 | 2.98587300  |
| H  | -2.44420000 | -1.32662800 | 3.31259500  |
| H  | -1.35860500 | -2.66538300 | 3.07568500  |
| C  | -3.32686400 | -3.21728100 | 3.85919500  |
| H  | -2.98378300 | -3.14468200 | 4.89479300  |

|   |             |             |            |
|---|-------------|-------------|------------|
| H | -4.35908400 | -2.85709000 | 3.83239600 |
| H | -3.32223700 | -4.27267900 | 3.57795600 |
| O | -0.06066400 | -1.10835100 | 1.80635000 |
| H | -1.99674000 | -1.31721600 | 1.05854600 |

**Re-TS2<sup>BA</sup>**

Total Energy= -3452.54423552

Sum of electronic and zero-point Energies= -3451.715102

Sum of electronic and thermal Energies= -3451.667516

Sum of electronic and thermal Enthalpies= -3451.666572

Sum of electronic and thermal Free Energies= -3451.795489

|   |             |             |             |
|---|-------------|-------------|-------------|
| C | -2.97717000 | -1.23106500 | 2.10392800  |
| C | -1.81201700 | -0.72049900 | 1.53761600  |
| C | -0.55213200 | -1.26628200 | 1.85366600  |
| C | -0.50539000 | -2.26810900 | 2.82317300  |
| C | -1.66430300 | -2.77908100 | 3.40512500  |
| C | -2.90016700 | -2.27245400 | 3.02975200  |
| H | -3.94746800 | -0.83188700 | 1.83555600  |
| H | 0.45779100  | -2.65733200 | 3.13294900  |
| H | -1.59302200 | -3.56804100 | 4.14563600  |
| H | -3.81407200 | -2.66695900 | 3.46093200  |
| C | 0.70577900  | -0.74028800 | 1.22533500  |
| O | 1.88418200  | -1.15087900 | 1.90205200  |
| H | 0.72257400  | 0.65109600  | 1.56821300  |
| O | -1.79826000 | 0.31716000  | 0.64111400  |
| C | -3.01398400 | 1.00676300  | 0.47180900  |
| H | -3.76359300 | 0.36756000  | -0.01382700 |
| H | -3.42344900 | 1.32141300  | 1.44445400  |
| C | -2.77056200 | 2.24516500  | -0.37636200 |
| O | -1.64147700 | 2.60204800  | -0.64608000 |
| C | -3.96640400 | 3.00772100  | -0.83470000 |
| C | -5.26838500 | 2.65598500  | -0.46240200 |
| C | -3.75545300 | 4.11880700  | -1.65805300 |
| C | -6.34678700 | 3.41213600  | -0.91018800 |
| H | -5.45532200 | 1.80185900  | 0.18100500  |
| C | -4.83389500 | 4.86835600  | -2.10814700 |
| H | -2.73818800 | 4.37632200  | -1.93323100 |
| C | -6.13039900 | 4.51506100  | -1.73328300 |
| H | -7.35514900 | 3.14028300  | -0.61759800 |
| H | -4.66747200 | 5.72747600  | -2.74923800 |
| H | -6.97414100 | 5.10146900  | -2.08237900 |
| C | 5.58210200  | -0.80790500 | -2.04450900 |
| C | 5.42853800  | 0.56142400  | -1.36196900 |
| C | 4.35402900  | -0.85494700 | 0.05673900  |

|    |              |              |              |
|----|--------------|--------------|--------------|
| C  | 4. 76242600  | -1. 75912400 | -1. 12614500 |
| H  | 5. 25999800  | -0. 78297000 | -3. 08605400 |
| H  | 6. 63793600  | -1. 08935500 | -2. 06211100 |
| H  | 3. 88933000  | -2. 19751300 | -1. 62086500 |
| H  | 5. 36539400  | -2. 59991500 | -0. 77837300 |
| C  | 5. 52732500  | 0. 16311600  | 0. 14487600  |
| C  | 3. 93708700  | 0. 98063800  | -1. 47223200 |
| H  | 3. 83180300  | 2. 03298800  | -1. 18896100 |
| C  | 3. 22483700  | 0. 08996200  | -0. 39115000 |
| H  | 2. 91427700  | 0. 69423500  | 0. 45880000  |
| H  | 4. 12062200  | -1. 38074800 | 0. 98274400  |
| C  | 1. 73468200  | -0. 66184200 | -2. 23937400 |
| C  | 2. 73292700  | -0. 21140800 | -3. 24936300 |
| C  | 0. 88180500  | -0. 88926300 | -0. 21859100 |
| H  | 2. 20592800  | 0. 06581000  | -4. 16333300 |
| N  | 1. 99471400  | -0. 50595500 | -0. 90326400 |
| O  | 3. 39969400  | 0. 94694200  | -2. 78835300 |
| H  | 3. 41733800  | -1. 03183900 | -3. 48516600 |
| N  | 0. 56035900  | -1. 16305000 | -2. 44893000 |
| N  | 0. 04389800  | -1. 32535200 | -1. 18638700 |
| C  | -1. 13202900 | -2. 09889100 | -1. 02615000 |
| C  | -1. 07894900 | -3. 32415000 | -0. 35463500 |
| C  | -2. 35821700 | -1. 65687400 | -1. 52945800 |
| C  | -2. 23473400 | -4. 03682500 | -0. 06947200 |
| C  | -3. 52617700 | -2. 36208500 | -1. 26958700 |
| C  | -3. 44879100 | -3. 52683200 | -0. 51322200 |
| H  | -2. 18475100 | -4. 96802900 | 0. 48106500  |
| H  | -4. 47624700 | -2. 00517400 | -1. 64874400 |
| Cl | -2. 44338900 | -0. 21495600 | -2. 48042900 |
| Cl | -4. 90812600 | -4. 37814100 | -0. 12554500 |
| Cl | 0. 45398300  | -3. 99489600 | 0. 11098700  |
| C  | 6. 37326900  | 1. 63104800  | -1. 87260300 |
| H  | 6. 26235500  | 2. 56229600  | -1. 30705400 |
| H  | 7. 41429900  | 1. 30351000  | -1. 79688200 |
| H  | 6. 16367500  | 1. 84869200  | -2. 92443400 |
| C  | 6. 85065800  | -0. 49624800 | 0. 54446600  |
| H  | 7. 68274700  | 0. 19538500  | 0. 37849300  |
| H  | 6. 82929300  | -0. 73468200 | 1. 61233200  |
| H  | 7. 06665200  | -1. 41982100 | 0. 00618500  |
| C  | 5. 31078900  | 1. 33037000  | 1. 12072600  |
| H  | 5. 11588600  | 0. 94827400  | 2. 12892900  |
| H  | 6. 21797200  | 1. 93989100  | 1. 17144600  |
| H  | 4. 49440800  | 2. 00766100  | 0. 85360300  |
| N  | 0. 85086500  | 1. 85778500  | 2. 05540600  |

|   |             |             |             |
|---|-------------|-------------|-------------|
| H | 1.99086000  | -2.10946100 | 1.80147700  |
| C | -0.45146100 | 2.11831600  | 2.72653700  |
| H | -1.16425400 | 2.32558200  | 1.92540100  |
| H | -0.74893000 | 1.17128900  | 3.19043000  |
| C | -0.48511900 | 3.21800300  | 3.78129700  |
| H | -1.50888500 | 3.29703000  | 4.15589100  |
| H | 0.15523700  | 2.97970400  | 4.63389100  |
| H | -0.19550000 | 4.19305100  | 3.38635200  |
| C | 2.01477700  | 1.76668700  | 2.97641000  |
| H | 2.71633900  | 1.05958100  | 2.52199200  |
| H | 1.65292200  | 1.28621600  | 3.89068600  |
| C | 2.74596900  | 3.06647400  | 3.29118800  |
| H | 2.11124200  | 3.80299700  | 3.78611900  |
| H | 3.58205400  | 2.83775000  | 3.95733700  |
| H | 3.16466500  | 3.52178000  | 2.38909800  |
| C | 1.08362500  | 2.65622700  | 0.82165400  |
| H | 0.50166000  | 2.16879400  | 0.03229100  |
| H | 2.14631700  | 2.56037500  | 0.57676700  |
| C | 0.70423500  | 4.13042400  | 0.86485300  |
| H | 1.26468000  | 4.68660500  | 1.61920600  |
| H | 0.92175600  | 4.56606300  | -0.11349200 |
| H | -0.36547000 | 4.25937600  | 1.04427200  |

### Si-TS2<sup>BA</sup>

Total Energy= -3452.54488518

Sum of electronic and zero-point Energies= -3451.715139

Sum of electronic and thermal Energies= -3451.667378

Sum of electronic and thermal Enthalpies= -3451.666434

Sum of electronic and thermal Free Energies= -3451.796504

|   |             |             |             |
|---|-------------|-------------|-------------|
| C | -1.22627900 | 3.56914300  | 1.28214300  |
| C | -0.65563400 | 2.32950800  | 1.01346900  |
| C | -1.38685900 | 1.13536500  | 1.14194400  |
| C | -2.70526400 | 1.22814100  | 1.58231200  |
| C | -3.29659800 | 2.46020300  | 1.85884400  |
| C | -2.55405300 | 3.62581800  | 1.70583400  |
| H | -0.66157400 | 4.48354700  | 1.13806900  |
| H | -3.29048100 | 0.32022700  | 1.68328300  |
| H | -4.33011800 | 2.50584600  | 2.18492200  |
| H | -3.00506000 | 4.59190100  | 1.90737400  |
| C | -0.69951900 | -0.16873500 | 0.81094900  |
| O | 0.61963500  | 2.15595700  | 0.55822900  |
| C | 1.56619700  | 3.18304300  | 0.70161800  |
| H | 1.55978200  | 3.84488600  | -0.17268500 |
| H | 1.37383300  | 3.78859800  | 1.59765800  |

|   |              |              |              |
|---|--------------|--------------|--------------|
| C | 2. 92184200  | 2. 50398700  | 0. 87084400  |
| O | 2. 96995600  | 1. 29848800  | 1. 04305300  |
| C | 4. 14543700  | 3. 34386500  | 0. 85366400  |
| C | 4. 08696700  | 4. 73358800  | 0. 70172100  |
| C | 5. 38366100  | 2. 70970300  | 1. 00746400  |
| C | 5. 25999900  | 5. 48081100  | 0. 70282400  |
| H | 3. 13586000  | 5. 24349400  | 0. 58526100  |
| C | 6. 55268000  | 3. 45834700  | 1. 00398600  |
| H | 5. 40629500  | 1. 63146700  | 1. 12963500  |
| C | 6. 49023800  | 4. 84401400  | 0. 85148400  |
| H | 5. 21431900  | 6. 55805600  | 0. 58673200  |
| H | 7. 51266900  | 2. 96742900  | 1. 12164600  |
| H | 7. 40392700  | 5. 42932900  | 0. 84968400  |
| C | 2. 71218000  | -4. 08636400 | -1. 76840300 |
| C | 3. 64147300  | -2. 88267300 | -1. 54442200 |
| C | 2. 07849000  | -2. 64459600 | 0. 08777400  |
| C | 1. 59122300  | -3. 87521000 | -0. 70954400 |
| H | 2. 35947300  | -4. 14376400 | -2. 79900200 |
| H | 3. 26104900  | -5. 01343900 | -1. 58382600 |
| H | 0. 60660500  | -3. 70562400 | -1. 16045900 |
| H | 1. 48420200  | -4. 74572600 | -0. 05794600 |
| C | 3. 62584800  | -2. 76819500 | 0. 01202800  |
| C | 2. 86502500  | -1. 60298800 | -1. 95421200 |
| H | 3. 55379900  | -0. 75391400 | -1. 97219000 |
| C | 1. 85502800  | -1. 38559700 | -0. 76306600 |
| H | 2. 15291700  | -0. 49877900 | -0. 20921800 |
| H | 1. 67416600  | -2. 54463200 | 1. 09731000  |
| C | 0. 10456600  | -1. 30517900 | -2. 53529700 |
| C | 1. 00421000  | -2. 01371700 | -3. 48518700 |
| C | -0. 54051700 | -0. 45990300 | -0. 59792000 |
| H | 0. 73835600  | -1. 72855600 | -4. 50396900 |
| N | 0. 48004000  | -1. 12304000 | -1. 22422800 |
| O | 2. 34499100  | -1. 62793300 | -3. 27786700 |
| H | 0. 85477100  | -3. 09470300 | -3. 38287700 |
| N | -1. 05536700 | -0. 79980300 | -2. 79220100 |
| N | -1. 45631200 | -0. 27905000 | -1. 58498400 |
| C | -2. 64537700 | 0. 48629500  | -1. 52923400 |
| C | -3. 87587100 | -0. 12081600 | -1. 28464800 |
| C | -2. 59916300 | 1. 87078000  | -1. 72376000 |
| C | -5. 02998100 | 0. 63587900  | -1. 12640100 |
| C | -3. 73318200 | 2. 65098100  | -1. 55993500 |
| C | -4. 93007100 | 2. 01731300  | -1. 24085300 |
| H | -5. 98032600 | 0. 15858300  | -0. 92165600 |
| H | -3. 68424300 | 3. 72624700  | -1. 67971700 |

|    |             |             |             |
|----|-------------|-------------|-------------|
| Cl | -1.10777400 | 2.61582700  | -2.18798300 |
| Cl | -6.34908500 | 2.98581300  | -0.99434600 |
| Cl | -3.96614400 | -1.84969200 | -1.19223900 |
| C  | 4.98868800  | -2.99048800 | -2.23042100 |
| H  | 5.62602600  | -2.13356900 | -1.98794200 |
| H  | 5.51030300  | -3.90403300 | -1.92968100 |
| H  | 4.85832700  | -3.01777400 | -3.31673800 |
| C  | 4.15180000  | -4.00587500 | 0.74600000  |
| H  | 5.20256100  | -4.17940200 | 0.49237400  |
| H  | 4.09877200  | -3.83631400 | 1.82613700  |
| H  | 3.59738100  | -4.91968700 | 0.52830100  |
| C  | 4.39929900  | -1.56365500 | 0.56614800  |
| H  | 5.47163600  | -1.78315400 | 0.55798800  |
| H  | 4.25162400  | -0.63121800 | 0.01899800  |
| H  | 4.10617200  | -1.37357300 | 1.60397900  |
| N  | -1.78250400 | -2.22978000 | 2.20690300  |
| H  | 1.10400200  | 0.36303500  | 1.39600000  |
| C  | -3.25667200 | -2.17727000 | 2.40284700  |
| H  | -3.44216900 | -1.44348000 | 3.19268700  |
| H  | -3.67533800 | -1.77320800 | 1.47618000  |
| C  | -3.95606800 | -3.49470700 | 2.71361800  |
| H  | -5.02186200 | -3.29209400 | 2.84337900  |
| H  | -3.85620000 | -4.20506900 | 1.88908100  |
| H  | -3.58808000 | -3.96332300 | 3.62737400  |
| C  | -1.30992000 | -3.33776100 | 1.33505000  |
| H  | -0.42295200 | -2.94707100 | 0.82516500  |
| H  | -2.07757300 | -3.48057900 | 0.56838600  |
| C  | -0.95404700 | -4.65530800 | 2.00874200  |
| H  | -1.79310900 | -5.09259800 | 2.55226100  |
| H  | -0.65020000 | -5.36368100 | 1.23364200  |
| H  | -0.11238300 | -4.53765100 | 2.69643700  |
| C  | -0.98985000 | -2.01142400 | 3.45347200  |
| H  | -1.05060800 | -0.93745500 | 3.65675200  |
| H  | 0.05189000  | -2.21416500 | 3.19690300  |
| C  | -1.42223200 | -2.79303900 | 4.68680000  |
| H  | -0.74820200 | -2.52942900 | 5.50553000  |
| H  | -2.43468100 | -2.52945500 | 5.00186300  |
| H  | -1.36939300 | -3.87384600 | 4.54517700  |
| O  | 0.49443100  | -0.38416000 | 1.54095200  |
| H  | -1.46437600 | -1.26161700 | 1.48636500  |

**Re-M02<sup>B</sup>**

Total Energy= -3452.10016248

Sum of electronic and zero-point Energies= -3451.281461

|                                              |             |             |              |
|----------------------------------------------|-------------|-------------|--------------|
| Sum of electronic and thermal Energies=      |             |             | -3451.233195 |
| Sum of electronic and thermal Enthalpies=    |             |             | -3451.232251 |
| Sum of electronic and thermal Free Energies= |             |             | -3451.364455 |
| C                                            | -3.12823200 | -0.54233400 | 1.97102700   |
| C                                            | -1.90042000 | -0.40142200 | 1.32510100   |
| C                                            | -0.76013400 | -1.09848300 | 1.77202600   |
| C                                            | -0.87874000 | -1.85541800 | 2.94194800   |
| C                                            | -2.09384000 | -1.98626600 | 3.60834800   |
| C                                            | -3.22252200 | -1.34427900 | 3.10851200   |
| H                                            | -4.01035700 | -0.03378700 | 1.59870900   |
| H                                            | 0.01092700  | -2.35722000 | 3.31063000   |
| H                                            | -2.15990700 | -2.59466300 | 4.50429000   |
| H                                            | -4.18224100 | -1.45254500 | 3.60346600   |
| C                                            | 0.54567600  | -0.98794700 | 1.10023600   |
| O                                            | 1.63301800  | -0.73754900 | 1.92263900   |
| H                                            | 1.43181200  | 0.14798000  | 2.35085100   |
| O                                            | -1.70705800 | 0.40929700  | 0.24277100   |
| C                                            | -2.69385100 | 1.35922400  | -0.04226700  |
| H                                            | -3.58114900 | 0.89475600  | -0.49852300  |
| H                                            | -3.01907800 | 1.88043200  | 0.87166300   |
| C                                            | -2.10364300 | 2.38267800  | -1.00274000  |
| O                                            | -0.93940300 | 2.32635400  | -1.33781700  |
| C                                            | -3.01004400 | 3.46677200  | -1.48896500  |
| C                                            | -4.34348900 | 3.56654900  | -1.07903100  |
| C                                            | -2.48551900 | 4.41203000  | -2.37658900  |
| C                                            | -5.14228300 | 4.60250100  | -1.55311300  |
| H                                            | -4.76947000 | 2.84490200  | -0.38882600  |
| C                                            | -3.28488200 | 5.44395700  | -2.85036900  |
| H                                            | -1.44883200 | 4.31776100  | -2.68262100  |
| C                                            | -4.61409000 | 5.54006000  | -2.43798100  |
| H                                            | -6.17559500 | 4.67769500  | -1.23183400  |
| H                                            | -2.87572900 | 6.17415100  | -3.54058000  |
| H                                            | -5.23919000 | 6.34696200  | -2.80670900  |
| C                                            | 5.55011800  | -1.39926700 | -1.76396800  |
| C                                            | 5.30588700  | 0.10039000  | -1.52432800  |
| C                                            | 4.21075100  | -0.89115300 | 0.20245400   |
| C                                            | 4.73850300  | -2.08145900 | -0.62604600  |
| H                                            | 5.25661400  | -1.69928000 | -2.77142100  |
| H                                            | 6.61852500  | -1.61786600 | -1.68049900  |
| H                                            | 3.91303600  | -2.69672400 | -0.99736300  |
| H                                            | 5.36791800  | -2.73598600 | -0.01905100  |
| C                                            | 5.33194300  | 0.17227800  | 0.03557100   |
| C                                            | 3.81006200  | 0.38065600  | -1.82294300  |
| H                                            | 3.64195000  | 1.46211200  | -1.83271700  |

|    |             |             |             |
|----|-------------|-------------|-------------|
| C  | 3.06150100  | -0.23017800 | -0.58080200 |
| H  | 2.63301700  | 0.57493600  | 0.01888300  |
| H  | 3.92102600  | -1.13397800 | 1.22601300  |
| C  | 1.65736800  | -1.41035600 | -2.25067900 |
| C  | 2.71968000  | -1.26083100 | -3.27904900 |
| C  | 0.75668500  | -1.24700200 | -0.21334900 |
| H  | 2.26418200  | -1.25381600 | -4.27034800 |
| N  | 1.94129200  | -1.08152300 | -0.94977500 |
| O  | 3.39781700  | -0.02784600 | -3.12329900 |
| H  | 3.40502500  | -2.11549300 | -3.21915500 |
| N  | 0.45884900  | -1.83698200 | -2.43986700 |
| N  | -0.11792100 | -1.78512300 | -1.16993500 |
| C  | -1.37515900 | -2.34692500 | -0.94835500 |
| C  | -1.55333200 | -3.42073300 | -0.06220100 |
| C  | -2.52544000 | -1.82917600 | -1.56489900 |
| C  | -2.81463100 | -3.87626800 | 0.30082400  |
| C  | -3.79652800 | -2.28964100 | -1.24944200 |
| C  | -3.92305200 | -3.28941200 | -0.29170500 |
| H  | -2.92219000 | -4.68130400 | 1.01716000  |
| H  | -4.66902900 | -1.85919500 | -1.72606400 |
| Cl | -2.37993900 | -0.55036400 | -2.72760500 |
| Cl | -5.51519900 | -3.82550500 | 0.16748400  |
| Cl | -0.16652300 | -4.23970900 | 0.58367300  |
| C  | 6.23865000  | 1.01796800  | -2.28959600 |
| H  | 6.04669100  | 2.06970900  | -2.05099300 |
| H  | 7.28592100  | 0.79789500  | -2.05935200 |
| H  | 6.09479400  | 0.88734200  | -3.36693800 |
| C  | 6.66284100  | -0.25616500 | 0.66194100  |
| H  | 7.46289400  | 0.43008000  | 0.36420900  |
| H  | 6.58317600  | -0.21433200 | 1.75312300  |
| H  | 6.97083400  | -1.26777900 | 0.39411100  |
| C  | 5.01428900  | 1.56277100  | 0.60412900  |
| H  | 4.89174400  | 1.50290700  | 1.69069500  |
| H  | 5.85099400  | 2.24205600  | 0.40968100  |
| H  | 4.11712700  | 2.03199900  | 0.19347800  |
| N  | 1.04277400  | 1.74303000  | 2.83732900  |
| C  | -0.15275800 | 1.67172300  | 3.68305700  |
| H  | -1.01000800 | 1.53881500  | 3.01234500  |
| H  | -0.08899500 | 0.74596700  | 4.27085100  |
| C  | -0.40796900 | 2.83993000  | 4.63724300  |
| H  | -1.34143400 | 2.66629100  | 5.18053700  |
| H  | 0.39125300  | 2.92774700  | 5.37893400  |
| H  | -0.49172700 | 3.79363700  | 4.11091000  |
| C  | 2.29900800  | 2.04817400  | 3.52889600  |



|   |             |            |            |
|---|-------------|------------|------------|
| H | 3.09693700  | 1.50665000 | 3.00152800 |
| H | 2.23302900  | 1.60061100 | 4.52699700 |
| C | 2.71362100  | 3.51634000 | 3.63728600 |
| H | 1.97253200  | 4.11820100 | 4.16837600 |
| H | 3.66269000  | 3.58637400 | 4.17663500 |
| H | 2.86458800  | 3.95426400 | 2.64620300 |
| C | 0.86247300  | 2.38271400 | 1.52534600 |
| H | 0.29495800  | 1.69282700 | 0.88802600 |
| H | 1.86134100  | 2.47139600 | 1.07851100 |
| C | 0.16527900  | 3.74413000 | 1.49074100 |
| H | 0.67549000  | 4.49630400 | 2.09774700 |
| H | 0.12745100  | 4.09809200 | 0.45660500 |
| H | -0.86791100 | 3.66331400 | 1.84520400 |

### **Si-M02<sup>B</sup>**

Total Energy= -3452.09003104

Sum of electronic and zero-point Energies= -3451.272158

Sum of electronic and thermal Energies= -3451.223507

Sum of electronic and thermal Enthalpies= -3451.222563

Sum of electronic and thermal Free Energies= -3451.357103

|   |             |             |            |
|---|-------------|-------------|------------|
| C | -3.07186800 | -1.01388700 | 2.42784600 |
| C | -1.86873000 | -0.54863000 | 1.90363600 |
| C | -0.92273900 | -1.44055200 | 1.35655200 |
| C | -1.21958600 | -2.80201600 | 1.36329000 |
| C | -2.43047900 | -3.27890900 | 1.86923400 |
| C | -3.34968000 | -2.38257100 | 2.40067200 |
| H | -3.79303900 | -0.32207600 | 2.84976300 |
| H | -0.49513500 | -3.49257700 | 0.93553600 |
| H | -2.65013800 | -4.34117500 | 1.84534800 |
| H | -4.29251300 | -2.74095700 | 2.80173700 |
| C | 0.29954400  | -0.86186000 | 0.75321400 |
| O | -1.52842900 | 0.76971300  | 1.84560000 |
| C | -2.55282900 | 1.72219100  | 1.85740000 |
| H | -3.45084400 | 1.35301800  | 1.33904100 |
| H | -2.84201200 | 1.99138000  | 2.88266700 |
| C | -2.06910900 | 2.96357700  | 1.11396300 |
| O | -1.00633300 | 2.97342500  | 0.52770900 |
| C | -2.97471600 | 4.15313800  | 1.11088200 |
| C | -4.23514600 | 4.13353400  | 1.71664800 |
| C | -2.53433900 | 5.31404300  | 0.46727000 |
| C | -5.04421100 | 5.26519200  | 1.67882300 |
| H | -4.59991600 | 3.24223400  | 2.21748200 |
| C | -3.34177900 | 6.44366700  | 0.43336800 |
| H | -1.55492600 | 5.30845600  | 0.00034100 |

|    |             |             |             |
|----|-------------|-------------|-------------|
| C  | -4.59755400 | 6.41954800  | 1.04001800  |
| H  | -6.02188800 | 5.24513300  | 2.14836500  |
| H  | -2.99585200 | 7.34326800  | -0.06484000 |
| H  | -5.22870200 | 7.30199000  | 1.01435500  |
| C  | 4.56720400  | 1.91600100  | -2.02516100 |
| C  | 3.49975600  | 2.93851600  | -1.59946300 |
| C  | 3.29086800  | 1.29460500  | -0.04992400 |
| C  | 4.37341800  | 0.75430900  | -1.00920400 |
| H  | 4.44588900  | 1.62160900  | -3.06942900 |
| H  | 5.56296900  | 2.36055700  | -1.94194800 |
| H  | 4.04798100  | -0.17555200 | -1.48760000 |
| H  | 5.30003100  | 0.52314800  | -0.47612000 |
| C  | 3.55782300  | 2.82359700  | -0.04377100 |
| C  | 2.11592700  | 2.30774900  | -1.90745200 |
| H  | 1.33569400  | 3.06772900  | -1.79448100 |
| C  | 1.93237900  | 1.24008100  | -0.76675100 |
| H  | 1.14178500  | 1.57509400  | -0.09226500 |
| H  | 3.26225400  | 0.81803500  | 0.93171300  |
| C  | 1.31362000  | -0.29743000 | -2.59478000 |
| C  | 2.10609800  | 0.50480800  | -3.56388200 |
| C  | 0.52109300  | -0.83491600 | -0.57892100 |
| H  | 1.70411700  | 0.35855400  | -4.56728400 |
| N  | 1.50009400  | -0.07457200 | -1.24788500 |
| O  | 1.97999900  | 1.88335000  | -3.26154100 |
| H  | 3.15315600  | 0.17717800  | -3.55331100 |
| N  | 0.40005600  | -1.15321200 | -2.87705100 |
| N  | -0.08533600 | -1.57697800 | -1.62560300 |
| C  | -1.42283700 | -2.02055000 | -1.61015600 |
| C  | -1.72049600 | -3.37652600 | -1.77256900 |
| C  | -2.49423900 | -1.14319500 | -1.40411400 |
| C  | -3.01890900 | -3.86069900 | -1.68059300 |
| C  | -3.79906200 | -1.59642900 | -1.26831400 |
| C  | -4.03734600 | -2.95874300 | -1.40239500 |
| H  | -3.22392200 | -4.91769000 | -1.79609200 |
| H  | -4.60830000 | -0.90244000 | -1.07581700 |
| Cl | -2.17934500 | 0.56073100  | -1.31490300 |
| Cl | -5.66289300 | -3.55340800 | -1.21726300 |
| Cl | -0.42732600 | -4.50234100 | -2.04310000 |
| C  | 3.66803500  | 4.31509700  | -2.21179500 |
| H  | 2.91144400  | 5.01158000  | -1.83450900 |
| H  | 4.65698000  | 4.72801600  | -1.98887600 |
| H  | 3.56202700  | 4.26035500  | -3.30007100 |
| C  | 4.91478800  | 3.19072500  | 0.56494800  |
| H  | 5.14591300  | 4.24483900  | 0.37750500  |

|   |            |             |             |
|---|------------|-------------|-------------|
| H | 4.87605100 | 3.05113900  | 1.65040500  |
| H | 5.74444200 | 2.59213900  | 0.18574700  |
| C | 2.50142900 | 3.65929000  | 0.69365600  |
| H | 2.78979200 | 4.71587000  | 0.67616900  |
| H | 1.49134700 | 3.58671100  | 0.28625900  |
| H | 2.45103900 | 3.34879200  | 1.74277100  |
| N | 3.06347800 | -1.97792700 | 2.11095500  |
| C | 3.24440600 | -2.48568500 | 0.74645100  |
| H | 2.34698700 | -3.06547300 | 0.50022600  |
| H | 3.23447000 | -1.61822500 | 0.07209200  |
| C | 4.50183900 | -3.30715000 | 0.45954000  |
| H | 4.48480000 | -3.64096300 | -0.58199800 |
| H | 5.40583400 | -2.70577700 | 0.59629000  |
| H | 4.57567100 | -4.18913300 | 1.10016400  |
| C | 4.21467900 | -1.28112300 | 2.69356700  |
| H | 3.82513100 | -0.49861700 | 3.35877500  |
| H | 4.72254000 | -0.76299500 | 1.87106500  |
| C | 5.22409300 | -2.11915400 | 3.48111400  |
| H | 5.66236800 | -2.91599700 | 2.87641100  |
| H | 6.03331800 | -1.47366400 | 3.83458100  |
| H | 4.75777100 | -2.57224800 | 4.36057200  |
| C | 2.30634800 | -2.83991200 | 3.02458900  |
| H | 1.25224300 | -2.79869400 | 2.71730200  |
| H | 2.35443700 | -2.37316000 | 4.01510000  |
| C | 2.72295500 | -4.30862900 | 3.11664900  |
| H | 2.08409300 | -4.82122300 | 3.84158600  |
| H | 2.59696600 | -4.81278800 | 2.15390700  |
| H | 3.76193500 | -4.42837900 | 3.43278000  |
| O | 1.13045700 | -0.15105700 | 1.60259800  |
| H | 1.88079800 | -0.77292000 | 1.84577300  |

**Re-M02<sup>BA</sup>**

Total Energy= -3452.55260580

Sum of electronic and zero-point Energies= -3451.718426

Sum of electronic and thermal Energies= -3451.670197

Sum of electronic and thermal Enthalpies= -3451.669253

Sum of electronic and thermal Free Energies= -3451.799685

|   |             |             |            |
|---|-------------|-------------|------------|
| C | -2.93675300 | -1.10389800 | 2.23613800 |
| C | -1.76367400 | -0.69021000 | 1.60600400 |
| C | -0.53560300 | -1.33716700 | 1.86644600 |
| C | -0.52671900 | -2.32982300 | 2.85411500 |
| C | -1.68920000 | -2.73425500 | 3.50144900 |
| C | -2.89909500 | -2.13559400 | 3.17341300 |
| H | -3.88558400 | -0.63308300 | 2.01156700 |

|   |             |             |             |
|---|-------------|-------------|-------------|
| H | 0.41599800  | -2.80644500 | 3.10155200  |
| H | -1.64740500 | -3.52040400 | 4.24751600  |
| H | -3.81993400 | -2.45089700 | 3.65233500  |
| C | 0.71478700  | -0.99464200 | 1.16377500  |
| O | 1.89489500  | -1.15062600 | 1.91363700  |
| H | 0.65238900  | 0.98040900  | 1.69979500  |
| O | -1.71384400 | 0.35858700  | 0.71873100  |
| C | -2.91550900 | 1.06972400  | 0.53758200  |
| H | -3.67891700 | 0.43173300  | 0.07467100  |
| H | -3.31480700 | 1.42218100  | 1.50208300  |
| C | -2.65134600 | 2.28546400  | -0.33605800 |
| O | -1.51473200 | 2.66487000  | -0.54289000 |
| C | -3.83125800 | 3.01232100  | -0.88224400 |
| C | -5.14570600 | 2.66205200  | -0.55376800 |
| C | -3.59334600 | 4.09112200  | -1.74092100 |
| C | -6.20924600 | 3.38777500  | -1.07969400 |
| H | -5.35384000 | 1.83396800  | 0.11642100  |
| C | -4.65719800 | 4.80876400  | -2.27034800 |
| H | -2.56713600 | 4.34770200  | -1.98154400 |
| C | -5.96596500 | 4.45731800  | -1.93882200 |
| H | -7.22733200 | 3.11792900  | -0.82088400 |
| H | -4.47022700 | 5.64102500  | -2.94044800 |
| H | -6.79819600 | 5.01825300  | -2.35169600 |
| C | 5.58205200  | -0.88605500 | -2.08712900 |
| C | 5.41365700  | 0.47545100  | -1.39159100 |
| C | 4.37544600  | -0.96763500 | 0.02284200  |
| C | 4.79214000  | -1.85905300 | -1.16594200 |
| H | 5.23764900  | -0.85643700 | -3.12176000 |
| H | 6.64218700  | -1.14949400 | -2.12646900 |
| H | 3.91918300  | -2.30577400 | -1.65275800 |
| H | 5.41529300  | -2.69031100 | -0.83031700 |
| C | 5.52893400  | 0.06909600  | 0.11216300  |
| C | 3.91472300  | 0.86699100  | -1.49213900 |
| H | 3.79366500  | 1.91264900  | -1.18850400 |
| C | 3.21998400  | -0.05359800 | -0.42364400 |
| H | 2.89891400  | 0.54498800  | 0.42965900  |
| H | 4.16350500  | -1.50601000 | 0.94780700  |
| C | 1.67959300  | -0.71890900 | -2.26246200 |
| C | 2.69013600  | -0.29641500 | -3.26983100 |
| C | 0.86760900  | -1.00032300 | -0.21301900 |
| H | 2.17921100  | -0.01260100 | -4.19052500 |
| N | 2.00847100  | -0.67757000 | -0.92876900 |
| O | 3.38549800  | 0.84916700  | -2.81110900 |
| H | 3.36262400  | -1.13177100 | -3.49233900 |

|    |             |             |             |
|----|-------------|-------------|-------------|
| N  | 0.46770100  | -1.09870000 | -2.47602500 |
| N  | -0.04254800 | -1.31243900 | -1.20009100 |
| C  | -1.21753500 | -2.06735500 | -1.03738600 |
| C  | -1.20152700 | -3.30427400 | -0.37891800 |
| C  | -2.45027200 | -1.58883000 | -1.49879000 |
| C  | -2.37551800 | -3.97462600 | -0.06095700 |
| C  | -3.63651800 | -2.25411300 | -1.21877400 |
| C  | -3.58257900 | -3.42362100 | -0.46845000 |
| H  | -2.34227900 | -4.91228700 | 0.48003900  |
| H  | -4.58175700 | -1.86080600 | -1.57354900 |
| Cl | -2.51759100 | -0.13193100 | -2.43417000 |
| Cl | -5.06351500 | -4.22877300 | -0.04858700 |
| Cl | 0.31041600  | -4.06101600 | 0.02042600  |
| C  | 6.33759300  | 1.56365600  | -1.90069600 |
| H  | 6.21581500  | 2.48903100  | -1.32734600 |
| H  | 7.38462800  | 1.25314500  | -1.83495800 |
| H  | 6.11654400  | 1.78560700  | -2.94933400 |
| C  | 6.86849500  | -0.56452900 | 0.49804900  |
| H  | 7.68431200  | 0.14847700  | 0.34145400  |
| H  | 6.85652000  | -0.82216500 | 1.56187200  |
| H  | 7.10312300  | -1.47336300 | -0.05732700 |
| C  | 5.29071500  | 1.22147900  | 1.10108000  |
| H  | 5.09714500  | 0.82330100  | 2.10378600  |
| H  | 6.18638200  | 1.84676000  | 1.16414900  |
| H  | 4.46392300  | 1.88708600  | 0.83636300  |
| N  | 0.83391700  | 1.93557700  | 2.08279900  |
| H  | 2.17685700  | -2.07649100 | 1.86386700  |
| C  | -0.48385500 | 2.32440400  | 2.71018800  |
| H  | -1.12811100 | 2.60101800  | 1.87531400  |
| H  | -0.87347000 | 1.40046600  | 3.14708300  |
| C  | -0.42985700 | 3.41259500  | 3.76748900  |
| H  | -1.45428700 | 3.58545900  | 4.10514500  |
| H  | 0.15187600  | 3.10652300  | 4.63919900  |
| H  | -0.04007000 | 4.35833000  | 3.38995100  |
| C  | 1.96499900  | 1.73877300  | 3.06197300  |
| H  | 2.60730200  | 0.97787300  | 2.61180000  |
| H  | 1.51980000  | 1.29034600  | 3.95383300  |
| C  | 2.77498500  | 2.98109200  | 3.39239200  |
| H  | 2.18765500  | 3.76910800  | 3.86392500  |
| H  | 3.55911600  | 2.68248600  | 4.09204700  |
| H  | 3.26946300  | 3.39131600  | 2.50847400  |
| C  | 1.20703500  | 2.72087200  | 0.84585700  |
| H  | 0.62666600  | 2.26985200  | 0.03851300  |
| H  | 2.26910100  | 2.52870900  | 0.67386000  |

|   |             |            |             |
|---|-------------|------------|-------------|
| C | 0.93232500  | 4.21208600 | 0.89729000  |
| H | 1.47972400  | 4.71986300 | 1.69282100  |
| H | 1.25493200  | 4.63396200 | -0.05715900 |
| H | -0.13532900 | 4.41730100 | 0.99731700  |

**Si-M02<sup>BA</sup>**

Total Energy= -3452.55085920

Sum of electronic and zero-point Energies= -3451.716995

Sum of electronic and thermal Energies= -3451.668423

Sum of electronic and thermal Enthalpies= -3451.667479

Sum of electronic and thermal Free Energies= -3451.800982

|   |             |             |             |
|---|-------------|-------------|-------------|
| C | -1.18739700 | 3.77331300  | 0.83991500  |
| C | -0.56009700 | 2.55920500  | 0.58580500  |
| C | -1.21268000 | 1.33017800  | 0.80649400  |
| C | -2.51325800 | 1.36847900  | 1.31296500  |
| C | -3.16119800 | 2.57750800  | 1.56392200  |
| C | -2.49455700 | 3.77485000  | 1.32818400  |
| H | -0.67836900 | 4.70887900  | 0.63500000  |
| H | -3.03866700 | 0.43352200  | 1.49374500  |
| H | -4.17790400 | 2.57962400  | 1.94140600  |
| H | -2.98947500 | 4.72156300  | 1.51696500  |
| C | -0.45764000 | 0.09146500  | 0.50061300  |
| O | 0.69258100  | 2.44255700  | 0.06089700  |
| C | 1.62981200  | 3.47420000  | 0.22613200  |
| H | 1.60486200  | 4.16955700  | -0.62118500 |
| H | 1.44750900  | 4.04432900  | 1.14772000  |
| C | 2.99757100  | 2.80327000  | 0.33334600  |
| O | 3.06514500  | 1.59319900  | 0.46329100  |
| C | 4.21109400  | 3.65728400  | 0.29614600  |
| C | 4.12942600  | 5.05328300  | 0.24978300  |
| C | 5.46283800  | 3.03229100  | 0.32089800  |
| C | 5.29256700  | 5.81569800  | 0.23062800  |
| H | 3.16775400  | 5.55665500  | 0.23339500  |
| C | 6.62178900  | 3.79614900  | 0.29544600  |
| H | 5.50533600  | 1.94863300  | 0.35677700  |
| C | 6.53615600  | 5.18808800  | 0.25137300  |
| H | 5.22841800  | 6.89775000  | 0.19766600  |
| H | 7.59193400  | 3.31119200  | 0.31087600  |
| H | 7.44201000  | 5.78519800  | 0.23328900  |
| C | 2.50821200  | -4.65947700 | -1.04776800 |
| C | 3.17112900  | -3.46812900 | -1.75916000 |
| C | 2.27248200  | -2.52917000 | 0.10234300  |
| C | 1.82549500  | -4.00455800 | 0.18705400  |
| H | 1.82472200  | -5.19465700 | -1.70926900 |

|    |             |             |             |
|----|-------------|-------------|-------------|
| H  | 3.27106500  | -5.38163100 | -0.74487500 |
| H  | 0.73342200  | -4.09351700 | 0.16364900  |
| H  | 2.15890000  | -4.46415700 | 1.12107700  |
| C  | 3.67867000  | -2.62409600 | -0.54997900 |
| C  | 2.03228900  | -2.56943700 | -2.30860400 |
| H  | 2.45683200  | -1.81216800 | -2.97401800 |
| C  | 1.47596500  | -1.84387000 | -1.02216200 |
| H  | 1.74617900  | -0.78693800 | -1.06706800 |
| H  | 2.23834900  | -1.97650300 | 1.04346600  |
| C  | -0.75029600 | -2.55216500 | -1.86086300 |
| C  | -0.12878100 | -3.67884100 | -2.60397100 |
| C  | -0.78680900 | -0.81954100 | -0.46281600 |
| H  | -0.76796000 | -3.95330300 | -3.44377700 |
| N  | 0.00942400  | -1.86881300 | -0.93178000 |
| O  | 1.11244000  | -3.26538600 | -3.14230400 |
| H  | -0.02637400 | -4.54887800 | -1.94400600 |
| N  | -1.93326600 | -2.07956200 | -2.02106000 |
| N  | -1.99599100 | -1.00176900 | -1.13415600 |
| C  | -2.97548100 | -0.01748400 | -1.36425500 |
| C  | -4.27908100 | -0.19316600 | -0.89176900 |
| C  | -2.67887500 | 1.17409100  | -2.03741400 |
| C  | -5.25088800 | 0.78712500  | -1.03864100 |
| C  | -3.62023400 | 2.18496900  | -2.17641500 |
| C  | -4.89601300 | 1.97493300  | -1.66660000 |
| H  | -6.25135300 | 0.63550800  | -0.65275500 |
| H  | -3.36528500 | 3.10917100  | -2.68021500 |
| Cl | -1.09810900 | 1.40457700  | -2.70785000 |
| Cl | -6.08098000 | 3.23547600  | -1.81530300 |
| Cl | -4.68088400 | -1.65084600 | -0.03892400 |
| C  | 4.17959400  | -3.84945200 | -2.82424800 |
| H  | 4.65948300  | -2.96145200 | -3.24938300 |
| H  | 4.95877200  | -4.49891900 | -2.41382100 |
| H  | 3.68474700  | -4.38796400 | -3.63842100 |
| C  | 4.69637100  | -3.34412000 | 0.34009300  |
| H  | 5.60469500  | -3.57043500 | -0.22783100 |
| H  | 4.98289600  | -2.68979700 | 1.16982700  |
| H  | 4.32681600  | -4.27699200 | 0.76801200  |
| C  | 4.30473300  | -1.27521400 | -0.93381800 |
| H  | 5.32445900  | -1.43438900 | -1.29872000 |
| H  | 3.76802100  | -0.72913300 | -1.71270500 |
| H  | 4.35791000  | -0.62085500 | -0.05797600 |
| N  | -1.11921500 | -1.43732800 | 2.99613600  |
| H  | 1.40563600  | 0.60875800  | 0.82505300  |
| C  | -2.57398300 | -1.56351500 | 3.37354100  |

|   |             |             |            |
|---|-------------|-------------|------------|
| H | -2.85759800 | -0.60269300 | 3.81110900 |
| H | -3.10850800 | -1.67168900 | 2.42505900 |
| C | -2.93209200 | -2.72482000 | 4.28532200 |
| H | -4.00481300 | -2.66441900 | 4.48109000 |
| H | -2.74230500 | -3.68726800 | 3.80591100 |
| H | -2.41490900 | -2.69489100 | 5.24457700 |
| C | -0.47367800 | -2.72141600 | 2.53417800 |
| H | 0.28115200  | -2.40169000 | 1.81212700 |
| H | -1.24934700 | -3.26851300 | 1.99010800 |
| C | 0.16788800  | -3.57227400 | 3.61513900 |
| H | -0.53445100 | -3.89031200 | 4.38597800 |
| H | 0.56267600  | -4.46944800 | 3.13259000 |
| H | 1.00796900  | -3.05794600 | 4.08712700 |
| C | -0.28305200 | -0.60029100 | 3.93558200 |
| H | -0.55620400 | 0.43414100  | 3.70956200 |
| H | 0.74975400  | -0.73771100 | 3.61231400 |
| C | -0.47080800 | -0.88243400 | 5.41528500 |
| H | 0.20771100  | -0.22327300 | 5.96113500 |
| H | -1.48506900 | -0.65410700 | 5.74939800 |
| H | -0.22832700 | -1.91003200 | 5.68833700 |
| O | 0.77390000  | -0.06921700 | 1.13851700 |
| H | -1.12581100 | -0.87967900 | 2.11959000 |

### **Re-M2**

Total Energy= -3159.81818386

Sum of electronic and zero-point Energies= -3159.210340

Sum of electronic and thermal Energies= -3159.172525

Sum of electronic and thermal Enthalpies= -3159.171580

Sum of electronic and thermal Free Energies= -3159.278184

|   |             |             |             |
|---|-------------|-------------|-------------|
| C | -3.94094500 | 1.43834700  | 1.70446300  |
| C | -2.64467000 | 1.45721000  | 1.17169300  |
| C | -1.68036200 | 0.55018500  | 1.64571500  |
| C | -2.03740800 | -0.26497400 | 2.73561300  |
| C | -3.31046300 | -0.26699400 | 3.28060100  |
| C | -4.27803000 | 0.58183700  | 2.73849600  |
| H | -4.66303200 | 2.13324100  | 1.28886600  |
| H | -1.27449100 | -0.93199300 | 3.12621500  |
| H | -3.55168700 | -0.92501300 | 4.10838500  |
| H | -5.28939700 | 0.58907900  | 3.13233400  |
| C | -0.29435200 | 0.40814400  | 1.13539300  |
| O | 0.70786400  | 0.61068400  | 2.07515100  |
| O | -2.49824300 | 2.40279500  | 0.19463500  |
| C | -1.26745300 | 2.73824600  | -0.40155200 |
| H | -1.47189400 | 3.64131000  | -0.98940000 |



|   |             |             |             |
|---|-------------|-------------|-------------|
| H | -0.95507100 | 1.96046800  | -1.09975000 |
| C | -0.15512000 | 3.04581200  | 0.58028200  |
| C | 1.24829700  | 3.06639000  | 0.06399600  |
| C | 1.57791400  | 2.79733200  | -1.27009300 |
| C | 2.26471300  | 3.37107100  | 0.97705900  |
| C | 2.90886400  | 2.83611800  | -1.67920900 |
| H | 0.80983400  | 2.56105300  | -2.00134300 |
| C | 3.59224700  | 3.39590600  | 0.56986000  |
| H | 1.99245400  | 3.59305800  | 2.00374300  |
| C | 3.91622800  | 3.12724100  | -0.76084200 |
| H | 3.15982700  | 2.64684300  | -2.71814300 |
| H | 4.37585700  | 3.62416200  | 1.28497300  |
| H | 4.95275000  | 3.15019500  | -1.08318400 |
| O | -0.39670700 | 3.29154400  | 1.75230200  |
| H | 0.56723200  | 1.50518100  | 2.43036100  |
| C | 3.78559800  | -3.08449800 | -0.16766600 |
| C | 4.57625900  | -1.76162900 | -0.19067400 |
| C | 2.80686500  | -1.28781100 | 1.15399000  |
| C | 2.52231900  | -2.72176600 | 0.65906500  |
| H | 3.55226600  | -3.43732800 | -1.17141500 |
| H | 4.38479100  | -3.85539000 | 0.32519100  |
| H | 1.61067800  | -2.75345000 | 0.05393000  |
| H | 2.37116200  | -3.40600600 | 1.49762500  |
| C | 4.35607200  | -1.24813100 | 1.26412400  |
| C | 3.72681600  | -0.75696600 | -1.01755100 |
| H | 4.31379600  | 0.12168900  | -1.32528300 |
| C | 2.59572900  | -0.31199200 | -0.01787900 |
| H | 2.78374700  | 0.71037000  | 0.31823900  |
| H | 2.26479600  | -0.99470800 | 2.05254700  |
| C | 1.07763200  | -0.59800500 | -1.98199000 |
| C | 2.26517400  | -0.72030800 | -2.87530100 |
| C | 0.02856100  | -0.11018700 | -0.07721900 |
| H | 2.60928400  | 0.28351400  | -3.16716200 |
| N | 1.28197200  | -0.32688200 | -0.65184100 |
| O | 3.27218000  | -1.41998600 | -2.18663400 |
| H | 2.00576400  | -1.28302500 | -3.77239500 |
| N | -0.16048200 | -0.68593600 | -2.31978100 |
| N | -0.85301300 | -0.40670500 | -1.13496200 |
| C | -2.20251800 | -0.77245600 | -1.02160400 |
| C | -3.20091400 | -0.10148600 | -1.74319600 |
| C | -2.61670900 | -1.79490600 | -0.15414300 |
| C | -4.54945400 | -0.36471500 | -1.54509500 |
| C | -3.95805100 | -2.05270900 | 0.09272500  |
| C | -4.90925600 | -1.31707900 | -0.60084000 |

|    |             |             |             |
|----|-------------|-------------|-------------|
| H  | -5.30163900 | 0.18101200  | -2.10105000 |
| H  | -4.24904800 | -2.82338100 | 0.79605800  |
| Cl | -1.42977100 | -2.79777300 | 0.61865200  |
| Cl | -6.59609900 | -1.60938300 | -0.29168700 |
| Cl | -2.76865700 | 1.10571900  | -2.91441100 |
| C  | 6.00385900  | -1.88116700 | -0.68877800 |
| H  | 6.52540200  | -0.91936300 | -0.63415400 |
| H  | 6.56511600  | -2.61055400 | -0.09656100 |
| H  | 6.01658500  | -2.21389400 | -1.73142600 |
| C  | 4.89044600  | -2.17733500 | 2.35836900  |
| H  | 5.97041300  | -2.32210300 | 2.24567600  |
| H  | 4.72201700  | -1.71769300 | 3.33770700  |
| H  | 4.41597500  | -3.15978200 | 2.37010500  |
| C  | 4.96093800  | 0.13977300  | 1.52158100  |
| H  | 4.47945600  | 0.61232000  | 2.38527000  |
| H  | 6.02738800  | 0.04056300  | 1.74826100  |
| H  | 4.87357500  | 0.82941800  | 0.67843200  |

### Si-M2

Total Energy= -3159.81766004

Sum of electronic and zero-point Energies= -3159.209872

Sum of electronic and thermal Energies= -3159.171988

Sum of electronic and thermal Enthalpies= -3159.171044

Sum of electronic and thermal Free Energies= -3159.279428

|   |             |             |             |
|---|-------------|-------------|-------------|
| C | 2.35207900  | -1.42720600 | 3.45980900  |
| C | 1.42853500  | -0.59809200 | 2.82305400  |
| C | 0.32449300  | -1.13484900 | 2.14669400  |
| C | 0.14119300  | -2.52394900 | 2.19508700  |
| C | 1.05043000  | -3.35911000 | 2.83369000  |
| C | 2.17140200  | -2.80544500 | 3.45211300  |
| H | 3.20086000  | -0.96882900 | 3.95659200  |
| H | -0.71916100 | -2.94190600 | 1.67974700  |
| H | 0.89599600  | -4.43266200 | 2.83703500  |
| H | 2.89743200  | -3.44474000 | 3.94409000  |
| C | -0.64750400 | -0.31737100 | 1.38020200  |
| O | -1.87247900 | -0.10281700 | 2.00535200  |
| O | 1.70336600  | 0.74799500  | 2.85040300  |
| C | 0.63685800  | 1.60421500  | 3.23148600  |
| H | -0.15549200 | 1.05101000  | 3.74466200  |
| H | 1.05246300  | 2.34289800  | 3.92844400  |
| C | -0.01082200 | 2.36490400  | 2.08322400  |
| C | 0.81574400  | 2.91378100  | 0.97267600  |
| C | 2.21050800  | 3.01051800  | 1.04861400  |
| C | 0.14248900  | 3.39177200  | -0.15682000 |

|    |             |             |             |
|----|-------------|-------------|-------------|
| C  | 2.92236800  | 3.58702200  | -0.00030300 |
| H  | 2.73957700  | 2.63432000  | 1.91802400  |
| C  | 0.85794700  | 3.96281500  | -1.20265000 |
| H  | -0.93877900 | 3.29319100  | -0.20008300 |
| C  | 2.24773700  | 4.06329000  | -1.12398200 |
| H  | 4.00284300  | 3.66952700  | 0.06219500  |
| H  | 0.33400700  | 4.32783000  | -2.08069100 |
| H  | 2.80520200  | 4.51236400  | -1.94029000 |
| C  | 3.23625200  | -2.18395200 | -2.43865000 |
| C  | 3.89758700  | -0.92745400 | -1.84081700 |
| C  | 2.45793100  | -1.57831900 | -0.21107300 |
| C  | 2.15467000  | -2.53531600 | -1.38340300 |
| H  | 2.82218500  | -1.99929100 | -3.42883000 |
| H  | 3.98631200  | -2.97437700 | -2.53327100 |
| H  | 1.14315100  | -2.36333800 | -1.76548900 |
| H  | 2.20815800  | -3.57958000 | -1.06580400 |
| C  | 3.98420600  | -1.31501700 | -0.33594400 |
| C  | 2.80314200  | 0.17550600  | -1.81743500 |
| H  | 3.23001700  | 1.18466700  | -1.71027200 |
| C  | 1.92646500  | -0.17622900 | -0.55877500 |
| H  | 2.15764700  | 0.50900700  | 0.26301800  |
| H  | 2.15328400  | -1.95880300 | 0.76002800  |
| C  | 0.03819000  | 0.62985700  | -1.98242600 |
| C  | 0.99093800  | 0.98113200  | -3.07919400 |
| C  | -0.55808200 | 0.00344600  | 0.06438800  |
| H  | 1.30912700  | 2.02644200  | -2.95431200 |
| N  | 0.50333300  | -0.00209300 | -0.84635800 |
| O  | 2.09122300  | 0.11091000  | -3.04106900 |
| H  | 0.50114000  | 0.87396300  | -4.04829600 |
| N  | -1.20781300 | 0.93623400  | -1.95485500 |
| N  | -1.62802900 | 0.57544300  | -0.65404400 |
| C  | -2.93462100 | 0.02257400  | -0.59564800 |
| C  | -3.19371200 | -1.31168500 | -0.92958000 |
| C  | -4.02776300 | 0.82049800  | -0.24561100 |
| C  | -4.47342200 | -1.84965000 | -0.88550800 |
| C  | -5.32231500 | 0.31753800  | -0.20049800 |
| C  | -5.52296800 | -1.01951500 | -0.51525900 |
| H  | -4.64540300 | -2.88713900 | -1.14433700 |
| H  | -6.15147800 | 0.95565600  | 0.07846600  |
| Cl | -3.77196000 | 2.48639500  | 0.15576700  |
| Cl | -7.13557800 | -1.67122200 | -0.45110200 |
| Cl | -1.89021000 | -2.34060900 | -1.44149200 |
| C  | 5.17299600  | -0.48688800 | -2.53286000 |
| H  | 5.62424200  | 0.37400400  | -2.02784000 |

|   |             |             |             |
|---|-------------|-------------|-------------|
| H | 5.90815900  | -1.29766800 | -2.55106900 |
| H | 4.96398700  | -0.19953700 | -3.56820300 |
| C | 4.80624200  | -2.56907700 | -0.02793300 |
| H | 5.84428200  | -2.44268500 | -0.35376800 |
| H | 4.81643700  | -2.73130900 | 1.05551200  |
| H | 4.41125900  | -3.47479300 | -0.49109800 |
| C | 4.53455100  | -0.18831400 | 0.55387400  |
| H | 4.22258000  | -0.33820500 | 1.59369000  |
| H | 5.62900500  | -0.20170400 | 0.52881000  |
| H | 4.22000400  | 0.81530900  | 0.25327700  |
| O | -1.20785900 | 2.60923500  | 2.15442300  |
| H | -1.97625200 | 0.86053600  | 2.13678700  |

### TS3RR

Total Energy= -3159.79182365

Sum of electronic and zero-point Energies= -3159.183600

Sum of electronic and thermal Energies= -3159.147111

Sum of electronic and thermal Enthalpies= -3159.146167

Sum of electronic and thermal Free Energies= -3159.250438

|   |             |             |            |
|---|-------------|-------------|------------|
| C | -2.61380300 | -2.03301400 | 3.31904500 |
| C | -1.69307000 | -1.12633500 | 2.77498100 |
| C | -0.91704300 | -1.47859100 | 1.66167300 |
| C | -1.10176800 | -2.76856100 | 1.13518900 |
| C | -2.02008100 | -3.66722300 | 1.65683700 |
| C | -2.77659200 | -3.29317700 | 2.76980700 |
| H | -3.19438000 | -1.70909700 | 4.17624700 |
| H | -0.48784900 | -3.05936800 | 0.28868300 |
| H | -2.13797200 | -4.64941800 | 1.21214200 |
| H | -3.49658900 | -3.98038800 | 3.20258800 |
| C | 0.22176200  | -0.64808900 | 1.11489300 |
| O | -1.67312800 | 0.08130900  | 3.39908000 |
| C | -1.08642400 | 1.17941800  | 2.73708000 |
| H | -1.63042400 | 1.42228100  | 1.81812700 |
| H | -1.19617300 | 2.02240100  | 3.42819400 |
| C | 0.39493200  | 0.99945900  | 2.45419900 |
| C | 0.97675200  | 2.19231300  | 1.73235500 |
| C | 2.09737700  | 2.79541500  | 2.31132600 |
| C | 0.35463400  | 2.82441500  | 0.65109200 |
| C | 2.57161900  | 4.01386000  | 1.83538700 |
| H | 2.56454700  | 2.30235200  | 3.15703000 |
| C | 0.83039800  | 4.03947800  | 0.16864800 |
| H | -0.50810500 | 2.36641500  | 0.17907500 |
| C | 1.93591500  | 4.64293800  | 0.76638800 |
| H | 3.43511100  | 4.47717300  | 2.30254000 |

|    |             |             |             |
|----|-------------|-------------|-------------|
| H  | 0.33635800  | 4.51610700  | -0.67218600 |
| H  | 2.30050200  | 5.59692700  | 0.39870400  |
| C  | -4.34039500 | 1.87885700  | -1.39303000 |
| C  | -4.49380700 | 0.40055100  | -1.78836700 |
| C  | -3.21838800 | 0.29207200  | 0.08672400  |
| C  | -3.33519800 | 1.80646800  | -0.21372500 |
| H  | -3.98117000 | 2.49341300  | -2.21699300 |
| H  | -5.31039400 | 2.27447100  | -1.08105500 |
| H  | -2.36884600 | 2.22488200  | -0.50993600 |
| H  | -3.67460200 | 2.36357300  | 0.66284900  |
| C  | -4.58597100 | -0.27576700 | -0.38913300 |
| C  | -3.09232600 | -0.06582000 | -2.28015900 |
| H  | -3.15327000 | -0.97441700 | -2.89684500 |
| C  | -2.29967200 | -0.36082800 | -0.95364200 |
| H  | -2.26922200 | -1.43611500 | -0.78037200 |
| H  | -2.98370300 | 0.04229000  | 1.11862900  |
| C  | -0.34659200 | 0.43614000  | -2.28480600 |
| C  | -1.21843600 | 0.67281500  | -3.47689400 |
| C  | 0.18855500  | -0.24238000 | -0.24585600 |
| H  | -1.20208400 | -0.22443500 | -4.11277300 |
| N  | -0.88146800 | 0.05601600  | -1.06903200 |
| O  | -2.52035600 | 0.97278300  | -3.05337000 |
| H  | -0.84000000 | 1.51776300  | -4.05386300 |
| N  | 0.94057000  | 0.44559000  | -2.28541000 |
| N  | 1.28715600  | 0.02535900  | -1.01688900 |
| C  | 2.62490600  | -0.44130800 | -0.88025000 |
| C  | 2.91806100  | -1.80625400 | -0.98005500 |
| C  | 3.69270400  | 0.45243600  | -0.80435000 |
| C  | 4.21667500  | -2.28180500 | -0.89500500 |
| C  | 5.00812200  | 0.00397200  | -0.72699400 |
| C  | 5.24888800  | -1.36067800 | -0.75482500 |
| H  | 4.41800900  | -3.34403100 | -0.95443700 |
| H  | 5.82157100  | 0.71485800  | -0.65270700 |
| Cl | 3.39843900  | 2.15126700  | -0.82844600 |
| Cl | 6.88509800  | -1.93779200 | -0.64761100 |
| Cl | 1.64148300  | -2.94145000 | -1.26658700 |
| C  | -5.60102500 | 0.11245100  | -2.78347400 |
| H  | -5.69598200 | -0.96199400 | -2.97239800 |
| H  | -6.56150500 | 0.48207300  | -2.41187800 |
| H  | -5.39641300 | 0.60809600  | -3.73748900 |
| C  | -5.73900500 | 0.20920300  | 0.49458700  |
| H  | -5.66569700 | 1.26092600  | 0.77524600  |
| H  | -6.69965900 | 0.05497400  | -0.00779700 |
| H  | -5.75160100 | -0.37782800 | 1.41858000  |

|   |             |             |             |
|---|-------------|-------------|-------------|
| C | -4.68016400 | -1.80847000 | -0.44440000 |
| H | -5.72449000 | -2.10550600 | -0.58244600 |
| H | -4.11234200 | -2.26457100 | -1.26001600 |
| H | -4.32902800 | -2.24616500 | 0.49734500  |
| O | 1.45447400  | -1.18213100 | 1.45563200  |
| O | 1.10833900  | 0.40771500  | 3.31331500  |
| H | 1.66237400  | -0.72197700 | 2.32275900  |

### TS3RS

Total Energy= -3159.79341304

Sum of electronic and zero-point Energies= -3159.184529

Sum of electronic and thermal Energies= -3159.148218

Sum of electronic and thermal Enthalpies= -3159.147273

Sum of electronic and thermal Free Energies= -3159.250152

|   |             |            |             |
|---|-------------|------------|-------------|
| C | -3.78194800 | 2.00068500 | 0.20720100  |
| C | -2.49570300 | 1.60987300 | -0.14856200 |
| C | -1.50058100 | 1.40739200 | 0.81282900  |
| C | -1.80084500 | 1.67617400 | 2.14965700  |
| C | -3.08448200 | 2.06976900 | 2.51925900  |
| C | -4.07787200 | 2.21633800 | 1.55065700  |
| H | -4.52507000 | 2.13198000 | -0.57258700 |
| H | -1.02123300 | 1.54479800 | 2.89226600  |
| H | -3.31171900 | 2.25741600 | 3.56348100  |
| H | -5.08075500 | 2.51515300 | 1.83889300  |
| C | -0.14536200 | 0.93154900 | 0.37230200  |
| O | 0.83453800  | 1.19802800 | 1.34918000  |
| O | -2.19446500 | 1.38540800 | -1.46154200 |
| C | -1.04935900 | 2.13722500 | -1.88129300 |
| H | -1.23877400 | 3.19327700 | -1.65869500 |
| H | -0.98716500 | 1.99978000 | -2.96203800 |
| C | 0.32088700  | 1.65297500 | -1.32624000 |
| O | 0.91349400  | 0.77042100 | -2.04919300 |
| C | 1.18246600  | 2.85762700 | -0.90373500 |
| C | 2.49466600  | 2.91321300 | -1.37532400 |
| C | 0.72440100  | 3.89125500 | -0.07407200 |
| C | 3.33734200  | 3.96618300 | -1.02733500 |
| H | 2.81865700  | 2.10753600 | -2.02817500 |
| C | 1.56712000  | 4.94296500 | 0.28266200  |
| H | -0.29447300 | 3.86934600 | 0.30840800  |
| C | 2.87613000  | 4.98355000 | -0.19430500 |
| H | 4.35516600  | 3.99330100 | -1.40566500 |
| H | 1.19926800  | 5.73140800 | 0.93179100  |
| H | 3.53001300  | 5.80479400 | 0.08107800  |
| H | 1.22381700  | 2.06302200 | 1.14508600  |

|    |             |             |             |
|----|-------------|-------------|-------------|
| C  | 4.33255200  | -2.84681200 | 0.93807000  |
| C  | 4.73505000  | -1.67552100 | 0.02567800  |
| C  | 3.15911400  | -0.76104000 | 1.38491000  |
| C  | 3.18607600  | -2.24753100 | 1.80142700  |
| H  | 4.05891900  | -3.73301900 | 0.36393500  |
| H  | 5.18524600  | -3.13632500 | 1.55821100  |
| H  | 2.21786700  | -2.73227900 | 1.63687600  |
| H  | 3.39350300  | -2.34797500 | 2.86893200  |
| C  | 4.64230300  | -0.47392300 | 1.01930700  |
| C  | 3.53795400  | -1.39095500 | -0.92452200 |
| H  | 3.84692500  | -0.71658800 | -1.72836800 |
| C  | 2.52090900  | -0.62774100 | -0.00630300 |
| H  | 2.47255000  | 0.41032200  | -0.31879500 |
| H  | 2.70911200  | -0.08918500 | 2.11618000  |
| C  | 0.87618200  | -2.35226900 | -0.70232200 |
| C  | 1.97506900  | -3.27011900 | -1.11211600 |
| C  | -0.02320800 | -0.49498700 | 0.03377800  |
| H  | 1.61103200  | -3.91124300 | -1.91666100 |
| N  | 1.15370700  | -1.12946000 | -0.16169800 |
| O  | 3.06651500  | -2.53779600 | -1.62542200 |
| H  | 2.25375700  | -3.90979300 | -0.26781000 |
| N  | -0.39894200 | -2.55051600 | -0.82259900 |
| N  | -0.95152200 | -1.38971900 | -0.35491100 |
| C  | -2.36033200 | -1.34077000 | -0.20498000 |
| C  | -2.93267300 | -1.40304200 | 1.06830100  |
| C  | -3.18824800 | -1.26359200 | -1.32628300 |
| C  | -4.30325500 | -1.28019300 | 1.24012000  |
| C  | -4.56455800 | -1.15187900 | -1.17650600 |
| C  | -5.09580400 | -1.13707700 | 0.10751900  |
| H  | -4.73772500 | -1.29805700 | 2.23170900  |
| H  | -5.20449900 | -1.06783300 | -2.04623300 |
| Cl | -2.50729200 | -1.29197100 | -2.91322700 |
| Cl | -6.80896100 | -0.93248100 | 0.30716700  |
| Cl | -1.92247100 | -1.65333300 | 2.45458000  |
| C  | 6.04018700  | -1.87373900 | -0.71859600 |
| H  | 6.30764500  | -0.98028300 | -1.29278400 |
| H  | 6.85805900  | -2.09645500 | -0.02645400 |
| H  | 5.95382600  | -2.71044900 | -1.41916200 |
| C  | 5.57726400  | -0.57081100 | 2.22982000  |
| H  | 6.62203600  | -0.59912900 | 1.90296000  |
| H  | 5.45319500  | 0.31972000  | 2.85450000  |
| H  | 5.39603600  | -1.44211400 | 2.86024500  |
| C  | 4.89807000  | 0.89508800  | 0.37231500  |
| H  | 4.47630300  | 1.69452600  | 0.99206000  |

|   |            |            |             |
|---|------------|------------|-------------|
| H | 5.97574100 | 1.06989400 | 0.29260100  |
| H | 4.48061600 | 1.00701600 | -0.63024300 |

**TS3SR**

Total Energy= -3159.78401498

Sum of electronic and zero-point Energies= -3159.176132

Sum of electronic and thermal Energies= -3159.139397

Sum of electronic and thermal Enthalpies= -3159.138453

Sum of electronic and thermal Free Energies= -3159.245006

|   |             |             |             |
|---|-------------|-------------|-------------|
| C | -2.42798100 | 3.25923000  | 0.28354900  |
| C | -1.39819200 | 2.34084800  | 0.46918800  |
| C | -0.72054600 | 1.79683100  | -0.63140800 |
| C | -1.01677500 | 2.26805100  | -1.91011100 |
| C | -2.03030500 | 3.20352900  | -2.10121700 |
| C | -2.74471800 | 3.68414700  | -1.00390700 |
| H | -2.94312300 | 3.65036100  | 1.15500200  |
| H | -0.44319700 | 1.88383600  | -2.74829000 |
| H | -2.26241700 | 3.55604200  | -3.10046400 |
| H | -3.54029300 | 4.40839100  | -1.14636500 |
| C | 0.38193500  | 0.86256100  | -0.33112800 |
| O | 1.43143900  | 0.78799500  | -1.23442100 |
| O | -1.11883300 | 1.95717300  | 1.75689100  |
| C | 0.23370800  | 1.65971700  | 2.17818000  |
| H | 0.44539400  | 2.33371700  | 3.01561400  |
| H | 0.25512100  | 0.63038700  | 2.55059500  |
| C | 1.31225700  | 1.80049900  | 1.10953500  |
| O | 2.38697000  | 1.11733800  | 1.20936300  |
| C | 1.50352200  | 3.22653900  | 0.58905000  |
| C | 0.71835300  | 4.30684500  | 1.00601200  |
| C | 2.58890100  | 3.48550700  | -0.25523500 |
| C | 0.98289100  | 5.59873000  | 0.55661400  |
| H | -0.10559300 | 4.15333000  | 1.69575900  |
| C | 2.84831200  | 4.77122000  | -0.71582300 |
| H | 3.25402600  | 2.67303400  | -0.52464900 |
| C | 2.04009300  | 5.83433500  | -0.31675800 |
| H | 0.36127000  | 6.42185500  | 0.89505800  |
| H | 3.69090300  | 4.94717800  | -1.37744500 |
| H | 2.24315700  | 6.83995000  | -0.67146500 |
| C | -3.90882600 | -2.99412000 | -0.60808900 |
| C | -4.57033700 | -1.82326300 | 0.13767000  |
| C | -2.91854600 | -0.81797400 | -1.06043800 |
| C | -2.72596600 | -2.32059600 | -1.36231900 |
| H | -3.61740700 | -3.79710700 | 0.06956900  |
| H | -4.62488200 | -3.43455700 | -1.30672700 |



|    |             |             |             |
|----|-------------|-------------|-------------|
| H  | -1.74546600 | -2.68782800 | -1.04114800 |
| H  | -2.77681700 | -2.50626300 | -2.43719000 |
| C  | -4.46076900 | -0.68263100 | -0.92801400 |
| C  | -3.57853300 | -1.32257700 | 1.22125900  |
| H  | -4.09409900 | -0.60912200 | 1.86920300  |
| C  | -2.50101800 | -0.54079900 | 0.39452700  |
| H  | -2.59989200 | 0.51161600  | 0.62386000  |
| H  | -2.44448900 | -0.13895500 | -1.77493000 |
| C  | -0.85286000 | -2.13450100 | 1.31705400  |
| C  | -1.92630200 | -3.00816000 | 1.87934000  |
| C  | 0.05630500  | -0.43654800 | 0.23487500  |
| H  | -1.58162400 | -3.41701000 | 2.83146600  |
| N  | -1.12631200 | -0.93322500 | 0.71925600  |
| O  | -3.11396300 | -2.30073800 | 2.14106500  |
| H  | -2.07628200 | -3.84820800 | 1.19207800  |
| N  | 0.40037800  | -2.44258800 | 1.24258500  |
| N  | 0.96769200  | -1.38722200 | 0.57482900  |
| C  | 2.29578100  | -1.59453500 | 0.11307000  |
| C  | 2.52206500  | -1.91951000 | -1.22781900 |
| C  | 3.36700600  | -1.63601000 | 1.00925500  |
| C  | 3.80681600  | -2.14739000 | -1.70285900 |
| C  | 4.65815800  | -1.87586600 | 0.55695600  |
| C  | 4.85998000  | -2.10533800 | -0.79863000 |
| H  | 3.97476800  | -2.37372600 | -2.74821400 |
| H  | 5.48723500  | -1.88757000 | 1.25330900  |
| Cl | 3.10402000  | -1.44364600 | 2.70458000  |
| Cl | 6.47589100  | -2.38768400 | -1.37537800 |
| Cl | 1.18402300  | -2.09828300 | -2.31604600 |
| C  | -5.94352600 | -2.12661300 | 0.70183400  |
| H  | -6.38872500 | -1.23504900 | 1.15594200  |
| H  | -6.61846200 | -2.48903500 | -0.07926600 |
| H  | -5.87400100 | -2.89929100 | 1.47408600  |
| C  | -5.19394400 | -0.97264900 | -2.24240900 |
| H  | -6.27105400 | -1.05929400 | -2.06600000 |
| H  | -5.04048900 | -0.13812600 | -2.93394200 |
| H  | -4.86019100 | -1.88150100 | -2.74404700 |
| C  | -4.94717400 | 0.69439100  | -0.45225200 |
| H  | -4.58452600 | 1.47063500  | -1.13459400 |
| H  | -6.04136400 | 0.72234400  | -0.46352000 |
| H  | -4.62941300 | 0.97572700  | 0.55433500  |
| H  | 2.22926900  | 0.87135100  | -0.65842400 |

**TS3SS**

Total Energy= -3159.79530949

|                                              |             |             |              |
|----------------------------------------------|-------------|-------------|--------------|
| Sum of electronic and zero-point Energies=   |             |             | -3159.186720 |
| Sum of electronic and thermal Energies=      |             |             | -3159.150127 |
| Sum of electronic and thermal Enthalpies=    |             |             | -3159.149182 |
| Sum of electronic and thermal Free Energies= |             |             | -3159.253467 |
| C                                            | 2.72906900  | 0.13532500  | 3.61354300   |
| C                                            | 1.79014300  | 0.66064200  | 2.71411200   |
| C                                            | 0.75419300  | -0.14469900 | 2.23186900   |
| C                                            | 0.65207300  | -1.45463000 | 2.72680900   |
| C                                            | 1.57996900  | -1.98270500 | 3.61077000   |
| C                                            | 2.63323300  | -1.17560100 | 4.04892100   |
| H                                            | 3.52171100  | 0.79131100  | 3.95815000   |
| H                                            | -0.18999000 | -2.05296200 | 2.39236600   |
| H                                            | 1.48333300  | -3.00390100 | 3.96276900   |
| H                                            | 3.37138900  | -1.56472800 | 4.74292100   |
| C                                            | -0.32753100 | 0.32691100  | 1.30073000   |
| O                                            | -1.60247300 | 0.07181500  | 1.78923800   |
| O                                            | 2.02019300  | 1.95715200  | 2.37082500   |
| C                                            | 1.14803100  | 2.66299900  | 1.50643600   |
| H                                            | 1.28166100  | 3.71877600  | 1.76635500   |
| H                                            | 1.47292200  | 2.54243000  | 0.46697100   |
| C                                            | -0.33374600 | 2.35283500  | 1.65346300   |
| C                                            | -1.15378400 | 2.99240600  | 0.54843300   |
| C                                            | -0.76279900 | 3.05160200  | -0.79585500  |
| C                                            | -2.31130700 | 3.66967600  | 0.93994900   |
| C                                            | -1.50906100 | 3.77606200  | -1.71936500  |
| H                                            | 0.13179000  | 2.53905800  | -1.14079100  |
| C                                            | -3.05702800 | 4.39893500  | 0.01862100   |
| H                                            | -2.59533300 | 3.62694800  | 1.98587000   |
| C                                            | -2.65632000 | 4.45708500  | -1.31445200  |
| H                                            | -1.19303100 | 3.80879600  | -2.75727200  |
| H                                            | -3.94855600 | 4.92775000  | 0.34157000   |
| H                                            | -3.23212000 | 5.03007300  | -2.03449700  |
| C                                            | 3.83934800  | -1.74195200 | -2.32819900  |
| C                                            | 4.35882000  | -0.42121000 | -1.73845700  |
| C                                            | 2.96367900  | -1.20656000 | -0.12023600  |
| C                                            | 2.81015000  | -2.22797700 | -1.26826300  |
| H                                            | 3.43563200  | -1.60865700 | -3.33216800  |
| H                                            | 4.66817200  | -2.44761100 | -2.42777700  |
| H                                            | 1.78333100  | -2.26036800 | -1.64762100  |
| H                                            | 3.03548500  | -3.23832700 | -0.92054300  |
| C                                            | 4.45815200  | -0.78510100 | -0.22108400  |
| C                                            | 3.18504800  | 0.59574400  | -1.73026500  |
| H                                            | 3.57618100  | 1.59145400  | -1.50160300  |
| C                                            | 2.29328000  | 0.11607800  | -0.53210000  |

|    |             |             |             |
|----|-------------|-------------|-------------|
| H  | 2.38043000  | 0.82346200  | 0.28711600  |
| H  | 2.63890200  | -1.56403500 | 0.86072500  |
| C  | 0.43113700  | -0.05259900 | -2.18457900 |
| C  | 1.40155300  | 0.00634700  | -3.31602800 |
| C  | -0.22363200 | 0.04106200  | -0.08015900 |
| H  | 0.92068200  | 0.49322500  | -4.16593200 |
| N  | 0.87980000  | 0.06069300  | -0.89082200 |
| O  | 2.52677100  | 0.79109500  | -2.97691900 |
| H  | 1.66701100  | -1.01209600 | -3.61710000 |
| N  | -0.85016300 | -0.19188200 | -2.25785900 |
| N  | -1.27091500 | -0.14840700 | -0.93601000 |
| C  | -2.45814000 | -0.87341700 | -0.63123200 |
| C  | -2.37628100 | -2.23168400 | -0.31000600 |
| C  | -3.71981700 | -0.28803000 | -0.71939900 |
| C  | -3.50885600 | -2.98486800 | -0.03714800 |
| C  | -4.87241100 | -1.02057700 | -0.45987200 |
| C  | -4.74720300 | -2.35915500 | -0.11361200 |
| H  | -3.42611200 | -4.03406500 | 0.21761600  |
| H  | -5.84516000 | -0.54941800 | -0.52680500 |
| Cl | -3.85247900 | 1.37690200  | -1.14418100 |
| Cl | -6.17938100 | -3.28459300 | 0.22100700  |
| Cl | -0.82489200 | -3.01432900 | -0.26900100 |
| C  | 5.60033600  | 0.12463000  | -2.41528900 |
| H  | 5.95436400  | 1.03548500  | -1.92122600 |
| H  | 6.40979800  | -0.61156400 | -2.40209900 |
| H  | 5.38450500  | 0.37064700  | -3.45979400 |
| C  | 5.41321400  | -1.94100000 | 0.09462300  |
| H  | 6.43956600  | -1.67160900 | -0.17507700 |
| H  | 5.39601400  | -2.13754300 | 1.17144200  |
| H  | 5.16471100  | -2.87361600 | -0.41341900 |
| C  | 4.87596400  | 0.38204400  | 0.68556600  |
| H  | 4.70962500  | 0.11296900  | 1.73327800  |
| H  | 5.94506400  | 0.57901600  | 0.55745800  |
| H  | 4.35213100  | 1.32383100  | 0.50401300  |
| O  | -0.83214500 | 2.30185100  | 2.81447400  |
| H  | -1.73600400 | 0.81976500  | 2.42450900  |

### M3RR

Total Energy= -3159.80291718

Sum of electronic and zero-point Energies= -3159.192915

Sum of electronic and thermal Energies= -3159.156584

Sum of electronic and thermal Enthalpies= -3159.155640

Sum of electronic and thermal Free Energies= -3159.259084

|   |             |             |            |
|---|-------------|-------------|------------|
| C | -2.45136400 | -2.40041400 | 3.22889700 |
|---|-------------|-------------|------------|

|   |             |             |             |
|---|-------------|-------------|-------------|
| C | -1.52545400 | -1.42235400 | 2.84442200  |
| C | -0.72575600 | -1.60081800 | 1.71275700  |
| C | -0.86665900 | -2.79465700 | 0.99391600  |
| C | -1.79785000 | -3.75940100 | 1.34937900  |
| C | -2.59107500 | -3.55951600 | 2.48340500  |
| H | -3.05070100 | -2.21545000 | 4.11430000  |
| H | -0.22284900 | -2.95202300 | 0.13313200  |
| H | -1.89433400 | -4.66735500 | 0.76374800  |
| H | -3.31842600 | -4.30729800 | 2.78294300  |
| C | 0.39739600  | -0.62389700 | 1.30561100  |
| O | -1.45635800 | -0.31992000 | 3.63639100  |
| C | -0.95784400 | 0.84246100  | 3.00420900  |
| H | -1.69822500 | 1.20507100  | 2.28277500  |
| H | -0.84693000 | 1.59257600  | 3.79057400  |
| C | 0.39782900  | 0.64056300  | 2.33033500  |
| C | 0.80054400  | 1.99257200  | 1.73979800  |
| C | 1.92656900  | 2.64546100  | 2.24646200  |
| C | 0.00033200  | 2.67159400  | 0.81342900  |
| C | 2.24228300  | 3.93985100  | 1.84229500  |
| H | 2.53274100  | 2.12607300  | 2.97911400  |
| C | 0.31470400  | 3.96475500  | 0.40372100  |
| H | -0.89048100 | 2.20175200  | 0.40804600  |
| C | 1.43715400  | 4.60686600  | 0.92203300  |
| H | 3.11936100  | 4.43130600  | 2.25248900  |
| H | -0.32458700 | 4.47145000  | -0.31334000 |
| H | 1.67980100  | 5.61875200  | 0.61319200  |
| C | -4.10691800 | 1.52364200  | -2.32646000 |
| C | -4.48086400 | 0.14930700  | -1.74370300 |
| C | -3.12343100 | 1.04258700  | -0.15812400 |
| C | -3.10069000 | 2.09493700  | -1.28544800 |
| H | -3.71775100 | 1.44328400  | -3.34223700 |
| H | -5.00145100 | 2.14820500  | -2.39217100 |
| H | -2.09138500 | 2.24178500  | -1.68639300 |
| H | -3.41881700 | 3.06942000  | -0.90885200 |
| C | -4.57116900 | 0.47618200  | -0.22082000 |
| C | -3.21062100 | -0.74136700 | -1.79520800 |
| H | -3.47681400 | -1.78368100 | -1.59718100 |
| C | -2.34721100 | -0.21316700 | -0.58932000 |
| H | -2.37886600 | -0.94315200 | 0.21389200  |
| H | -2.84331300 | 1.42503700  | 0.82307500  |
| C | -0.51680400 | 0.01576200  | -2.24877800 |
| C | -1.51137200 | 0.07569300  | -3.35548100 |
| C | 0.19260100  | -0.25623400 | -0.18396800 |
| H | -1.03643000 | -0.28586500 | -4.26854800 |

|    |             |             |             |
|----|-------------|-------------|-------------|
| N  | -0.92305900 | -0.09639600 | -0.94347400 |
| O  | -2.58500900 | -0.79740700 | -3.07091400 |
| H  | -1.83237300 | 1.10796600  | -3.52283900 |
| N  | 0.77336500  | -0.04647300 | -2.35156800 |
| N  | 1.20137800  | -0.21356600 | -1.06851000 |
| C  | 2.61070900  | -0.41008500 | -0.90876100 |
| C  | 3.15455000  | -1.69676800 | -0.95678200 |
| C  | 3.47194800  | 0.68308700  | -0.91926400 |
| C  | 4.52294200  | -1.89536400 | -0.88472700 |
| C  | 4.85141300  | 0.50872900  | -0.84439200 |
| C  | 5.35446000  | -0.78153400 | -0.80888300 |
| H  | 4.93172300  | -2.89785400 | -0.89970200 |
| H  | 5.50903500  | 1.36873700  | -0.83286700 |
| Cl | 2.84016900  | 2.28215100  | -1.07183300 |
| Cl | 7.07354700  | -1.02079400 | -0.71245600 |
| Cl | 2.12326100  | -3.06956400 | -1.15666900 |
| C  | -5.68121000 | -0.50890400 | -2.39406200 |
| H  | -5.93544300 | -1.44799700 | -1.89137400 |
| H  | -6.55510000 | 0.14838700  | -2.36054400 |
| H  | -5.46742400 | -0.73399100 | -3.44351500 |
| C  | -5.62415000 | 1.52689400  | 0.14441200  |
| H  | -5.46554900 | 2.49625600  | -0.32923700 |
| H  | -6.62213100 | 1.17287300  | -0.13322300 |
| H  | -5.62023500 | 1.68342000  | 1.22756600  |
| C  | -4.82951700 | -0.74130100 | 0.68152400  |
| H  | -5.89662500 | -0.98271900 | 0.67241500  |
| H  | -4.29474000 | -1.65078500 | 0.39657200  |
| H  | -4.55211700 | -0.50810800 | 1.71555900  |
| O  | 1.60733500  | -1.19950700 | 1.39459800  |
| O  | 1.30490900  | 0.21469400  | 3.29313100  |
| H  | 1.79016000  | -0.49535300 | 2.73358500  |

### M3RS

Total Energy= -3159.79921488

Sum of electronic and zero-point Energies= -3159.189151

Sum of electronic and thermal Energies= -3159.152624

Sum of electronic and thermal Enthalpies= -3159.151680

Sum of electronic and thermal Free Energies= -3159.255334

|   |             |            |            |
|---|-------------|------------|------------|
| C | -3.79918500 | 1.93369300 | 0.96590600 |
| C | -2.52386500 | 1.77952900 | 0.42898900 |
| C | -1.47994200 | 1.22782600 | 1.17269400 |
| C | -1.72071100 | 0.88152100 | 2.49898800 |
| C | -2.99055200 | 1.02255500 | 3.05374000 |
| C | -4.03127700 | 1.53766200 | 2.28043500 |

|   |             |             |             |
|---|-------------|-------------|-------------|
| H | -4.58192500 | 2.36540300  | 0.35007100  |
| H | -0.88259200 | 0.48978000  | 3.06624900  |
| H | -3.17045500 | 0.73364400  | 4.08433400  |
| H | -5.02444100 | 1.64888200  | 2.70523700  |
| C | -0.07056600 | 0.98220000  | 0.58799300  |
| O | 0.87402900  | 0.99851900  | 1.49910700  |
| O | -2.28570900 | 2.18937300  | -0.85683400 |
| C | -1.04144200 | 2.88159800  | -0.93735400 |
| H | -1.03495800 | 3.69157500  | -0.19843800 |
| H | -0.98075800 | 3.30139500  | -1.94380300 |
| C | 0.16752700  | 1.97191500  | -0.71948300 |
| O | 0.26498100  | 1.22398600  | -1.92976400 |
| C | 1.39157100  | 2.84384800  | -0.51472500 |
| C | 2.33119200  | 3.01796600  | -1.53356400 |
| C | 1.57546100  | 3.52658600  | 0.69516600  |
| C | 3.44887700  | 3.83244600  | -1.34241200 |
| H | 2.18469900  | 2.53996900  | -2.49733100 |
| C | 2.68310900  | 4.34439800  | 0.88114600  |
| H | 0.86093900  | 3.37934300  | 1.49619000  |
| C | 3.63011100  | 4.49420600  | -0.13383100 |
| H | 4.16852400  | 3.95436600  | -2.14592800 |
| H | 2.81474900  | 4.86208400  | 1.82621300  |
| H | 4.49702100  | 5.12973300  | 0.01773600  |
| C | 4.23344600  | -3.00006500 | 0.64398100  |
| C | 4.66217400  | -1.73176700 | -0.11266500 |
| C | 3.06110600  | -0.97443000 | 1.31639600  |
| C | 3.07275800  | -2.49888800 | 1.54999200  |
| H | 3.96819300  | -3.80945800 | -0.03827300 |
| H | 5.07135300  | -3.37055700 | 1.24060500  |
| H | 2.10495700  | -2.95383900 | 1.31300000  |
| H | 3.25963800  | -2.72458500 | 2.60190300  |
| C | 4.55133200  | -0.65231800 | 1.01390100  |
| C | 3.48520500  | -1.32871300 | -1.04583700 |
| H | 3.82903500  | -0.58046100 | -1.76752500 |
| C | 2.46428400  | -0.66246800 | -0.06264400 |
| H | 2.44899700  | 0.41950300  | -0.17831600 |
| H | 2.57636000  | -0.38197200 | 2.08999700  |
| C | 0.79280600  | -2.27235400 | -0.96580800 |
| C | 1.88944800  | -3.15708400 | -1.45447000 |
| C | -0.06568400 | -0.45277300 | -0.08326800 |
| H | 1.53552000  | -3.70799900 | -2.32723200 |
| N | 1.09150100  | -1.10649300 | -0.31765900 |
| O | 2.99180400  | -2.37803900 | -1.87761300 |
| H | 2.15518900  | -3.88192500 | -0.67882800 |

|    |             |             |             |
|----|-------------|-------------|-------------|
| N  | -0.48889200 | -2.41881700 | -1.11502800 |
| N  | -1.00653400 | -1.28157700 | -0.55093200 |
| C  | -2.42183400 | -1.15958100 | -0.47424500 |
| C  | -3.08628600 | -1.60074900 | 0.67351700  |
| C  | -3.16111800 | -0.66708100 | -1.54924300 |
| C  | -4.45900800 | -1.45521800 | 0.79964300  |
| C  | -4.53861200 | -0.51471700 | -1.44330700 |
| C  | -5.16008800 | -0.89148500 | -0.26021200 |
| H  | -4.96528900 | -1.76806600 | 1.70431100  |
| H  | -5.10840200 | -0.10703000 | -2.26917400 |
| Cl | -2.37613600 | -0.25822600 | -3.03011200 |
| Cl | -6.87168600 | -0.64846300 | -0.09336800 |
| Cl | -2.18943200 | -2.36009100 | 1.94337500  |
| C  | 5.98086900  | -1.84962700 | -0.85021800 |
| H  | 6.26132100  | -0.89723100 | -1.31291100 |
| H  | 6.78453800  | -2.15226000 | -0.17206800 |
| H  | 5.90713600  | -2.60168900 | -1.64229200 |
| C  | 5.46528600  | -0.89623700 | 2.21798300  |
| H  | 6.51541100  | -0.88633700 | 1.90769400  |
| H  | 5.32922900  | -0.08834100 | 2.94373300  |
| H  | 5.27506700  | -1.83794900 | 2.73514600  |
| C  | 4.81133500  | 0.78864500  | 0.54252800  |
| H  | 4.35424200  | 1.49984400  | 1.23991500  |
| H  | 5.88794100  | 0.98431200  | 0.52109100  |
| H  | 4.42530700  | 1.02221800  | -0.45279900 |
| H  | 1.14703600  | 0.83419400  | -1.98882500 |

### M3SR

Total Energy= -3159.80173266

Sum of electronic and zero-point Energies= -3159.190882

Sum of electronic and thermal Energies= -3159.154156

Sum of electronic and thermal Enthalpies= -3159.153212

Sum of electronic and thermal Free Energies= -3159.257993

|   |             |            |            |
|---|-------------|------------|------------|
| C | 2.48091400  | 3.00588600 | 1.19815800 |
| C | 1.51258000  | 2.37178000 | 0.41584500 |
| C | 0.55050400  | 1.55390700 | 1.01415300 |
| C | 0.56776700  | 1.38199300 | 2.39700900 |
| C | 1.54698500  | 1.98078600 | 3.18134100 |
| C | 2.50284000  | 2.79791900 | 2.57246900 |
| H | 3.19695700  | 3.66085500 | 0.71245900 |
| H | -0.22954000 | 0.78280700 | 2.82822900 |
| H | 1.55875300  | 1.83238500 | 4.25579900 |
| H | 3.26277000  | 3.28951900 | 3.17174500 |
| C | -0.59266500 | 0.94767200 | 0.19172900 |

|   |             |             |             |
|---|-------------|-------------|-------------|
| O | -1.75406400 | 0.78932600  | 0.79620100  |
| O | 1.58016000  | 2.60316600  | -0.93336200 |
| C | 0.60511700  | 2.00359300  | -1.78642200 |
| H | 0.51960800  | 2.66094500  | -2.65363900 |
| H | 0.95791000  | 1.02839300  | -2.14694600 |
| C | -0.73865000 | 1.83056300  | -1.09438200 |
| O | -1.57707000 | 1.13749300  | -1.99494300 |
| C | -1.34565200 | 3.20830500  | -0.79056200 |
| C | -1.68634900 | 3.99304000  | -1.89882600 |
| C | -1.59203700 | 3.71905900  | 0.48605800  |
| C | -2.22833200 | 5.26433600  | -1.74392900 |
| H | -1.54232900 | 3.58855300  | -2.89702000 |
| C | -2.13274600 | 4.99509200  | 0.64282500  |
| H | -1.39328100 | 3.10757100  | 1.35604800  |
| C | -2.44657800 | 5.77483100  | -0.46600200 |
| H | -2.48405900 | 5.85290300  | -2.61951000 |
| H | -2.31611600 | 5.37588000  | 1.64296300  |
| H | -2.86841000 | 6.76670800  | -0.33694500 |
| C | 4.32243800  | -2.66225500 | 0.55127200  |
| C | 4.66926800  | -1.60662500 | -0.51035700 |
| C | 3.16121800  | -0.53636500 | 0.81655800  |
| C | 3.21779400  | -1.96685400 | 1.39623600  |
| H | 4.03177400  | -3.61327300 | 0.10428800  |
| H | 5.20836600  | -2.87423700 | 1.15565300  |
| H | 2.24509100  | -2.46724500 | 1.34070900  |
| H | 3.47977100  | -1.93869900 | 2.45566400  |
| C | 4.62332700  | -0.29579200 | 0.33591400  |
| C | 3.42997100  | -1.41896000 | -1.42714800 |
| H | 3.71280800  | -0.82721000 | -2.30188300 |
| C | 2.44367600  | -0.56347700 | -0.54545400 |
| H | 2.39443600  | 0.44477700  | -0.94440100 |
| H | 2.76516800  | 0.21141300  | 1.50380100  |
| C | 0.81825100  | -2.40462200 | -0.88862700 |
| C | 1.90113800  | -3.32699500 | -1.33092300 |
| C | -0.12003500 | -0.51233400 | -0.26483000 |
| H | 1.48137700  | -4.03439600 | -2.04802100 |
| N | 1.07017900  | -1.09558600 | -0.56921700 |
| O | 2.91786600  | -2.61505400 | -1.99963000 |
| H | 2.26818800  | -3.89625200 | -0.47173200 |
| N | -0.44057800 | -2.68876500 | -0.76976500 |
| N | -1.00413100 | -1.51430700 | -0.36998300 |
| C | -2.38505600 | -1.58541100 | -0.01204600 |
| C | -2.74235200 | -1.79676500 | 1.32346900  |
| C | -3.36595900 | -1.67228600 | -0.99491800 |



|    |             |             |             |
|----|-------------|-------------|-------------|
| C  | -4.06494600 | -1.97859700 | 1.68647400  |
| C  | -4.70433300 | -1.85263600 | -0.65366500 |
| C  | -5.03335300 | -1.98924900 | 0.68506100  |
| H  | -4.33483600 | -2.12028700 | 2.72557700  |
| H  | -5.46272600 | -1.90169500 | -1.42507500 |
| Cl | -2.93722300 | -1.58835500 | -2.67225300 |
| Cl | -6.69911800 | -2.22042600 | 1.12758200  |
| Cl | -1.51298600 | -1.86289500 | 2.53928000  |
| C  | 5.93391800  | -1.89773200 | -1.29376400 |
| H  | 6.15458400  | -1.09611400 | -2.00624100 |
| H  | 6.79144100  | -2.00897300 | -0.62302500 |
| H  | 5.82293400  | -2.82873900 | -1.85842100 |
| C  | 5.61217000  | -0.24705800 | 1.50464900  |
| H  | 6.64218000  | -0.26985500 | 1.13454300  |
| H  | 5.47625800  | 0.69469100  | 2.04638500  |
| H  | 5.49269200  | -1.05870400 | 2.22321000  |
| C  | 4.86279000  | 0.98037100  | -0.48442700 |
| H  | 4.63786200  | 1.86061400  | 0.12312600  |
| H  | 5.91887700  | 1.03330000  | -0.76787200 |
| H  | 4.28038700  | 1.05851300  | -1.40518700 |
| H  | -2.34549900 | 0.90479600  | -1.44363700 |

### M3SS

Total Energy= -3159.80878086

Sum of electronic and zero-point Energies= -3159.198269

Sum of electronic and thermal Energies= -3159.161949

Sum of electronic and thermal Enthalpies= -3159.161005

Sum of electronic and thermal Free Energies= -3159.265553

|   |             |             |            |
|---|-------------|-------------|------------|
| C | 2.73234300  | -0.59751100 | 3.48963800 |
| C | 1.79898800  | 0.13864100  | 2.74859800 |
| C | 0.70002600  | -0.49476000 | 2.16619200 |
| C | 0.53256300  | -1.86447000 | 2.38460400 |
| C | 1.46532600  | -2.61104500 | 3.09100900 |
| C | 2.57554300  | -1.96693300 | 3.64338600 |
| H | 3.56548100  | -0.06698900 | 3.93954000 |
| H | -0.36899700 | -2.32028200 | 1.99053300 |
| H | 1.32264800  | -3.67732800 | 3.23023500 |
| H | 3.31056000  | -2.52882600 | 4.21106200 |
| C | -0.40070100 | 0.24732200  | 1.38729600 |
| O | -1.63344600 | -0.15302400 | 1.71656300 |
| O | 2.06508500  | 1.46884500  | 2.64161400 |
| C | 1.16718100  | 2.31810800  | 1.93963400 |
| H | 1.11826100  | 3.25030600  | 2.51016900 |
| H | 1.60559300  | 2.56001600  | 0.96438200 |

|    |             |             |             |
|----|-------------|-------------|-------------|
| C  | -0.26138300 | 1.80824600  | 1.78059400  |
| C  | -0.97531200 | 2.77947300  | 0.83887600  |
| C  | -0.49520900 | 3.07307200  | -0.44499700 |
| C  | -2.09496900 | 3.47414200  | 1.30030300  |
| C  | -1.12543500 | 4.02112700  | -1.24595500 |
| H  | 0.38905700  | 2.57715800  | -0.83913400 |
| C  | -2.72565900 | 4.42527900  | 0.50289600  |
| H  | -2.45528200 | 3.26598300  | 2.30031500  |
| C  | -2.24597600 | 4.70191400  | -0.77484500 |
| H  | -0.73541400 | 4.22960500  | -2.23731700 |
| H  | -3.59553100 | 4.95266400  | 0.88254800  |
| H  | -2.73499000 | 5.44552100  | -1.39617100 |
| C  | 3.99278000  | -1.54147600 | -2.34971600 |
| C  | 4.40486000  | -0.19437600 | -1.73631600 |
| C  | 3.04689100  | -1.09933200 | -0.14846800 |
| C  | 2.98291300  | -2.11070400 | -1.31298200 |
| H  | 3.60117400  | -1.42785300 | -3.36101600 |
| H  | 4.87252900  | -2.18437300 | -2.43742200 |
| H  | 1.96638000  | -2.21889300 | -1.70643800 |
| H  | 3.27635000  | -3.10450600 | -0.96944500 |
| C  | 4.50768300  | -0.56728700 | -0.22234300 |
| C  | 3.15763800  | 0.73302100  | -1.73508800 |
| H  | 3.46647500  | 1.75720600  | -1.50924300 |
| C  | 2.29843600  | 0.18797600  | -0.54009300 |
| H  | 2.33603100  | 0.88398500  | 0.29252800  |
| H  | 2.74245300  | -1.50383200 | 0.81792700  |
| C  | 0.46563700  | -0.11137700 | -2.19796500 |
| C  | 1.43412000  | -0.00380800 | -3.32694000 |
| C  | -0.20985300 | 0.00698600  | -0.11458400 |
| H  | 0.92308100  | 0.43805200  | -4.18391300 |
| N  | 0.88532400  | 0.05160300  | -0.90410800 |
| O  | 2.49047200  | 0.87028400  | -2.98490700 |
| H  | 1.77780500  | -1.00162800 | -3.61496300 |
| N  | -0.81503100 | -0.31321400 | -2.25746800 |
| N  | -1.22189900 | -0.25297200 | -0.95424800 |
| C  | -2.52487400 | -0.77642600 | -0.67548600 |
| C  | -2.65523800 | -2.14760600 | -0.44644700 |
| C  | -3.67347000 | -0.00342200 | -0.80971700 |
| C  | -3.89883300 | -2.72974100 | -0.25642600 |
| C  | -4.93226800 | -0.56358400 | -0.62304500 |
| C  | -5.02483800 | -1.91805200 | -0.33582200 |
| H  | -3.98572600 | -3.79159600 | -0.06351900 |
| H  | -5.81979100 | 0.05109700  | -0.70804600 |
| Cl | -3.54295200 | 1.66610100  | -1.21568200 |

|    |             |             |             |
|----|-------------|-------------|-------------|
| Cl | -6.59257600 | -2.62751300 | -0.09775300 |
| Cl | -1.24396400 | -3.15389300 | -0.43738100 |
| C  | 5.61206400  | 0.45334700  | -2.38461700 |
| H  | 5.89004500  | 1.37767000  | -1.86747600 |
| H  | 6.47274000  | -0.22195500 | -2.37008600 |
| H  | 5.39498200  | 0.70212900  | -3.42814100 |
| C  | 5.53499200  | -1.65569900 | 0.10418100  |
| H  | 6.54321900  | -1.31814200 | -0.15683600 |
| H  | 5.51943000  | -1.84938700 | 1.18172100  |
| H  | 5.35419100  | -2.60445700 | -0.40267000 |
| C  | 4.82543800  | 0.62233400  | 0.69717900  |
| H  | 4.59253800  | 0.36556500  | 1.73486500  |
| H  | 5.89440000  | 0.84969200  | 0.64042800  |
| H  | 4.29228500  | 1.54627100  | 0.46048900  |
| O  | -0.85601300 | 1.79992900  | 3.04945500  |
| H  | -1.49658000 | 1.04087100  | 2.93274000  |

#### **TS4RR**

Total Energy= -3159.79538657

Sum of electronic and zero-point Energies= -3159.186153

Sum of electronic and thermal Energies= -3159.149665

Sum of electronic and thermal Enthalpies= -3159.148721

Sum of electronic and thermal Free Energies= -3159.252719

|   |             |            |             |
|---|-------------|------------|-------------|
| C | -3.07869600 | 3.31248000 | 0.53877200  |
| C | -1.84766200 | 2.77548000 | 0.15681600  |
| C | -1.02409600 | 2.16240400 | 1.10445500  |
| C | -1.44354000 | 2.09825400 | 2.43145600  |
| C | -2.68350100 | 2.59597700 | 2.81581900  |
| C | -3.49681200 | 3.20991100 | 1.86008100  |
| H | -3.69207000 | 3.79460400 | -0.21537600 |
| H | -0.76169700 | 1.64331700 | 3.14408500  |
| H | -3.00917100 | 2.52514800 | 3.84799800  |
| H | -4.46332400 | 3.61394200 | 2.14521100  |
| C | 0.34734400  | 1.61537100 | 0.73517300  |
| O | -1.52106600 | 2.88768500 | -1.16026900 |
| C | -0.34901700 | 2.22909400 | -1.62302800 |
| H | -0.58647300 | 1.18651400 | -1.87692000 |
| H | -0.06104500 | 2.75753200 | -2.53433100 |
| C | 0.78897000  | 2.25841000 | -0.61752800 |
| C | 2.09632900  | 1.74374600 | -1.20662400 |
| C | 3.28134500  | 1.93976300 | -0.47943800 |
| C | 2.19247900  | 1.23340500 | -2.50178100 |
| C | 4.51837300  | 1.66538700 | -1.04655500 |
| H | 3.21905500  | 2.30943800 | 0.53742500  |

|    |             |             |             |
|----|-------------|-------------|-------------|
| C  | 3.43584500  | 0.94492500  | -3.06852300 |
| H  | 1.30246600  | 1.05274700  | -3.09622600 |
| C  | 4.60275900  | 1.17495600  | -2.35071500 |
| H  | 5.42353700  | 1.83171800  | -0.46926100 |
| H  | 3.48390800  | 0.55239600  | -4.07959800 |
| H  | 5.57140700  | 0.96680800  | -2.79534700 |
| C  | -3.71796000 | -2.44709900 | -1.55888100 |
| C  | -4.59877900 | -1.70629600 | -0.53265400 |
| C  | -3.04744300 | -0.15603900 | -1.13478700 |
| C  | -2.63875400 | -1.39837100 | -1.95152800 |
| H  | -3.31229300 | -3.37713300 | -1.16145900 |
| H  | -4.32524200 | -2.73385300 | -2.42169000 |
| H  | -1.61934900 | -1.72724500 | -1.72680800 |
| H  | -2.66376700 | -1.17864000 | -3.02095700 |
| C  | -4.60043200 | -0.25691100 | -1.11618100 |
| C  | -3.78739300 | -1.47727800 | 0.76300300  |
| H  | -4.44744300 | -1.00039400 | 1.49189100  |
| C  | -2.70182500 | -0.41639800 | 0.34822300  |
| H  | -2.82929800 | 0.48359900  | 0.94681100  |
| H  | -2.65960400 | 0.79416500  | -1.50839700 |
| C  | -1.05713800 | -2.18372200 | 0.94391100  |
| C  | -2.11406600 | -3.21676300 | 1.14508100  |
| C  | -0.14222500 | -0.21771200 | 0.44498900  |
| H  | -1.83116400 | -3.84050300 | 1.99564300  |
| N  | -1.32759700 | -0.88805200 | 0.58492600  |
| O  | -3.35805400 | -2.63769600 | 1.45510200  |
| H  | -2.15393600 | -3.86227800 | 0.26126600  |
| N  | 0.21799500  | -2.38900100 | 1.04816600  |
| N  | 0.75579900  | -1.17039400 | 0.74109100  |
| C  | 2.16917700  | -1.12760700 | 0.61256800  |
| C  | 2.99575300  | -0.90233100 | 1.71192000  |
| C  | 2.73929300  | -1.49709500 | -0.60802000 |
| C  | 4.37859100  | -0.92460200 | 1.56776100  |
| C  | 4.11471100  | -1.54808300 | -0.76951000 |
| C  | 4.91227600  | -1.23268500 | 0.32359800  |
| H  | 5.02081800  | -0.72501600 | 2.41677500  |
| H  | 4.54997500  | -1.81552800 | -1.72408100 |
| Cl | 1.71312800  | -1.96587600 | -1.92562300 |
| Cl | 6.63865900  | -1.22547900 | 0.11836100  |
| Cl | 2.31664400  | -0.68881300 | 3.28383100  |
| C  | -5.93658400 | -2.36877500 | -0.27030500 |
| H  | -6.54733400 | -1.77763400 | 0.41999400  |
| H  | -6.49766200 | -2.50169600 | -1.20040800 |
| H  | -5.78537700 | -3.35554600 | 0.17821800  |

|   |             |             |             |
|---|-------------|-------------|-------------|
| C | -5.22146400 | -0.14591400 | -2.51283000 |
| H | -4.82246800 | -0.85786600 | -3.23558500 |
| H | -6.30374500 | -0.29960400 | -2.45280800 |
| H | -5.05374900 | 0.86047500  | -2.90933900 |
| C | -5.30881300 | 0.79020000  | -0.24680700 |
| H | -6.37697900 | 0.55705500  | -0.18450900 |
| H | -4.92640300 | 0.88304600  | 0.77098800  |
| H | -5.21358700 | 1.77631400  | -0.71090200 |
| O | 1.21904800  | 1.59040900  | 1.64797900  |
| O | 0.96579600  | 3.63158800  | -0.26900800 |
| H | 1.37725700  | 3.62673400  | 0.60873200  |

### TS4RS

Total Energy= -3159.79489557

Sum of electronic and zero-point Energies= -3159.186051

Sum of electronic and thermal Energies= -3159.149444

Sum of electronic and thermal Enthalpies= -3159.148500

Sum of electronic and thermal Free Energies= -3159.254100

|   |             |             |             |
|---|-------------|-------------|-------------|
| C | 3.79394300  | 1.70724000  | -2.16926800 |
| C | 2.53955100  | 1.93226600  | -1.59450600 |
| C | 1.52528200  | 0.97463500  | -1.70618400 |
| C | 1.74247800  | -0.13041600 | -2.52686800 |
| C | 2.97494200  | -0.35490800 | -3.12604700 |
| C | 4.01173500  | 0.55899000  | -2.91797800 |
| H | 4.56646800  | 2.45766900  | -2.03849000 |
| H | 0.91879200  | -0.82560100 | -2.66617500 |
| H | 3.13336100  | -1.23498500 | -3.74107600 |
| H | 4.98642700  | 0.39054800  | -3.36564100 |
| C | 0.15913900  | 1.19665800  | -1.07009000 |
| O | -0.83870200 | 1.15670500  | -1.82899000 |
| O | 2.35591600  | 3.12486400  | -0.96252500 |
| C | 1.00064100  | 3.48474700  | -0.74008400 |
| H | 0.50778300  | 3.69574300  | -1.69742700 |
| H | 1.02171100  | 4.38617400  | -0.12559600 |
| C | 0.25944300  | 2.36009300  | -0.00579600 |
| O | 1.12232300  | 2.04731400  | 1.06295500  |
| C | -1.11441000 | 2.79928000  | 0.45793500  |
| C | -1.51054400 | 2.61950200  | 1.78532100  |
| C | -2.03342200 | 3.34723400  | -0.44745000 |
| C | -2.80205300 | 2.94719200  | 2.19693000  |
| H | -0.81144200 | 2.23657100  | 2.52236700  |
| C | -3.31487100 | 3.69372700  | -0.03176700 |
| H | -1.75483700 | 3.46583400  | -1.48748300 |
| C | -3.70955100 | 3.48447600  | 1.28932100  |

|    |             |             |             |
|----|-------------|-------------|-------------|
| H  | -3.09103800 | 2.79089800  | 3.23143400  |
| H  | -4.01566000 | 4.11150700  | -0.74813800 |
| H  | -4.71415100 | 3.74431500  | 1.60756100  |
| C  | -4.14362800 | -2.89834600 | -0.35166800 |
| C  | -4.69372300 | -1.49625100 | -0.04204300 |
| C  | -2.87623100 | -1.07038700 | -1.34089200 |
| C  | -2.84790100 | -2.60339700 | -1.16070400 |
| H  | -3.99462100 | -3.48873000 | 0.55343600  |
| H  | -4.87057600 | -3.44828900 | -0.95569200 |
| H  | -1.93535000 | -2.94094900 | -0.65714600 |
| H  | -2.85852200 | -3.10668900 | -2.12995300 |
| C  | -4.39711800 | -0.75449600 | -1.38594500 |
| C  | -3.69698900 | -0.79619000 | 0.92410600  |
| H  | -4.15169600 | 0.11527000  | 1.32390000  |
| C  | -2.50881800 | -0.39214300 | -0.01200200 |
| H  | -2.47539600 | 0.68621800  | -0.15546800 |
| H  | -2.27775600 | -0.68007500 | -2.16542400 |
| C  | -1.06150400 | -1.71568700 | 1.51958200  |
| C  | -2.24931800 | -2.38260900 | 2.12695900  |
| C  | 0.01625600  | -0.31008200 | 0.17843200  |
| H  | -2.03630100 | -2.59632600 | 3.17605300  |
| N  | -1.20631700 | -0.76807000 | 0.54101200  |
| O  | -3.37907100 | -1.53626500 | 2.10131000  |
| H  | -2.42404100 | -3.33752800 | 1.61989400  |
| N  | 0.18981500  | -1.91176100 | 1.80701600  |
| N  | 0.83408900  | -1.03493700 | 0.97077200  |
| C  | 2.25418600  | -1.06213400 | 0.90565000  |
| C  | 2.88237500  | -1.84457300 | -0.06668600 |
| C  | 3.04726100  | -0.36444900 | 1.81872500  |
| C  | 4.25748100  | -1.79690800 | -0.24678500 |
| C  | 4.42612500  | -0.30739500 | 1.66727900  |
| C  | 5.00490700  | -0.99640900 | 0.60811400  |
| H  | 4.73035900  | -2.37681600 | -1.02956000 |
| H  | 5.03170900  | 0.25865700  | 2.36402000  |
| Cl | 2.32896300  | 0.37318600  | 3.21325400  |
| Cl | 6.72224900  | -0.89183000 | 0.37208800  |
| Cl | 1.94254300  | -2.94706200 | -1.01509400 |
| C  | -6.11829400 | -1.47743400 | 0.47530200  |
| H  | -6.47707800 | -0.45122800 | 0.60973200  |
| H  | -6.79486100 | -1.99108500 | -0.21468400 |
| H  | -6.17568500 | -1.98409200 | 1.44406400  |
| C  | -5.09125300 | -1.35620500 | -2.61199900 |
| H  | -6.17902000 | -1.31198500 | -2.49314900 |
| H  | -4.83305300 | -0.76668100 | -3.49743400 |

|   |             |             |             |
|---|-------------|-------------|-------------|
| H | -4.81553300 | -2.39181700 | -2.81558400 |
| C | -4.74310700 | 0.74093400  | -1.37053900 |
| H | -4.19179600 | 1.25930800  | -2.16241800 |
| H | -5.81255600 | 0.87525600  | -1.56181800 |
| H | -4.51570100 | 1.25026300  | -0.43204100 |
| H | 0.71134500  | 1.36876000  | 1.60999600  |

**TS4SR**

Total Energy= -3159.79830185

Sum of electronic and zero-point Energies= -3159.188759

Sum of electronic and thermal Energies= -3159.152374

Sum of electronic and thermal Enthalpies= -3159.151430

Sum of electronic and thermal Free Energies= -3159.255968

|   |             |             |             |
|---|-------------|-------------|-------------|
| C | 2.41527900  | 3.17865900  | 0.49907300  |
| C | 1.37350000  | 2.39545100  | 0.00236000  |
| C | 0.49554900  | 1.75360900  | 0.88276500  |
| C | 0.68705100  | 1.88294500  | 2.25540300  |
| C | 1.75387300  | 2.61922800  | 2.75995200  |
| C | 2.61058600  | 3.27439600  | 1.87314900  |
| H | 3.05470800  | 3.70295100  | -0.20321700 |
| H | -0.03487500 | 1.40094300  | 2.90798600  |
| H | 1.90447000  | 2.70605000  | 3.83052700  |
| H | 3.43039000  | 3.87700600  | 2.25161900  |
| C | -0.72556200 | 1.05949500  | 0.33311300  |
| O | -1.71689500 | 0.80714800  | 1.07531700  |
| O | 1.28459300  | 2.29826300  | -1.36112400 |
| C | 0.13742500  | 1.67654000  | -1.95659600 |
| H | -0.06164700 | 2.22312800  | -2.88200300 |
| H | 0.37574600  | 0.63991300  | -2.21814100 |
| C | -1.07822600 | 1.69347900  | -1.04585400 |
| O | -2.08023200 | 0.90009600  | -1.63818000 |
| C | -1.60706400 | 3.11693400  | -0.80693700 |
| C | -2.82718700 | 3.27535900  | -0.13792400 |
| C | -0.95026700 | 4.26076700  | -1.26822300 |
| C | -3.37336600 | 4.53795300  | 0.06196500  |
| H | -3.33759800 | 2.39984100  | 0.24728700  |
| C | -1.49886400 | 5.52781500  | -1.06982500 |
| H | 0.00315400  | 4.17946200  | -1.77923000 |
| C | -2.71176200 | 5.67207400  | -0.40625100 |
| H | -4.32052700 | 4.63681900  | 0.58318300  |
| H | -0.97133000 | 6.40198400  | -1.43868100 |
| H | -3.13964400 | 6.65795700  | -0.25410200 |
| C | 4.58489600  | -2.32354600 | 0.89363100  |
| C | 4.79972000  | -1.49613700 | -0.38329100 |

|    |             |             |             |
|----|-------------|-------------|-------------|
| C  | 3.27148000  | -0.27443800 | 0.77739500  |
| C  | 3.46722600  | -1.54181200 | 1.63890100  |
| H  | 4.34917700  | -3.36464300 | 0.67190600  |
| H  | 5.51030900  | -2.34378900 | 1.47535300  |
| H  | 2.53572700  | -2.10839200 | 1.74287600  |
| H  | 3.77104000  | -1.27240200 | 2.65252600  |
| C  | 4.68797400  | -0.04156000 | 0.17235700  |
| C  | 3.50967600  | -1.58966100 | -1.24211200 |
| H  | 3.70820900  | -1.17327000 | -2.23372600 |
| C  | 2.49204900  | -0.64472800 | -0.49814300 |
| H  | 2.31469000  | 0.24794900  | -1.09599900 |
| H  | 2.84725200  | 0.57009300  | 1.32020900  |
| C  | 1.00310100  | -2.62766500 | -0.39340300 |
| C  | 2.14348300  | -3.54303900 | -0.67432000 |
| C  | -0.03421400 | -0.67848700 | -0.13297500 |
| H  | 1.76735100  | -4.41942200 | -1.20493500 |
| N  | 1.17839900  | -1.27014200 | -0.32154900 |
| O  | 3.07760900  | -2.91447600 | -1.52754900 |
| H  | 2.58651800  | -3.88233100 | 0.26689900  |
| N  | -0.24183800 | -2.94946000 | -0.23494900 |
| N  | -0.85765400 | -1.73785800 | -0.06192100 |
| C  | -2.26973800 | -1.77679200 | 0.10240400  |
| C  | -2.83621800 | -1.80229300 | 1.37848100  |
| C  | -3.09516200 | -1.93086700 | -1.01173600 |
| C  | -4.21138100 | -1.86981200 | 1.54338200  |
| C  | -4.47780600 | -1.99644600 | -0.87099400 |
| C  | -5.01310800 | -1.94870700 | 0.40899800  |
| H  | -4.64600000 | -1.86972900 | 2.53509400  |
| H  | -5.11430500 | -2.09557900 | -1.74151400 |
| Cl | -2.40386800 | -2.07656800 | -2.59092100 |
| Cl | -6.73845800 | -2.02169300 | 0.60478500  |
| Cl | -1.81654500 | -1.79359000 | 2.77208700  |
| C  | 6.04679300  | -1.86550000 | -1.16205200 |
| H  | 6.17665800  | -1.22203500 | -2.03825900 |
| H  | 6.93959600  | -1.77956700 | -0.53497100 |
| H  | 5.97910900  | -2.90007900 | -1.51303300 |
| C  | 5.72291900  | 0.31934500  | 1.24240500  |
| H  | 6.73186400  | 0.30807900  | 0.81702100  |
| H  | 5.52590400  | 1.33486000  | 1.60176900  |
| H  | 5.71476200  | -0.34150000 | 2.10985000  |
| C  | 4.79402600  | 1.04168000  | -0.91071700 |
| H  | 4.61317300  | 2.02493700  | -0.47062700 |
| H  | 5.81037700  | 1.04654500  | -1.31789000 |
| H  | 4.10764300  | 0.92737900  | -1.75243600 |



|   |             |            |             |
|---|-------------|------------|-------------|
| H | -2.62410700 | 0.61684200 | -0.88155800 |
|---|-------------|------------|-------------|

**TS4SS**

Total Energy= -3159.80420653

|                                            |              |
|--------------------------------------------|--------------|
| Sum of electronic and zero-point Energies= | -3159.195060 |
|--------------------------------------------|--------------|

|                                         |              |
|-----------------------------------------|--------------|
| Sum of electronic and thermal Energies= | -3159.158672 |
|-----------------------------------------|--------------|

|                                           |              |
|-------------------------------------------|--------------|
| Sum of electronic and thermal Enthalpies= | -3159.157728 |
|-------------------------------------------|--------------|

|                                              |              |
|----------------------------------------------|--------------|
| Sum of electronic and thermal Free Energies= | -3159.261580 |
|----------------------------------------------|--------------|

|   |             |             |             |
|---|-------------|-------------|-------------|
| C | 1.69908100  | 1.83639200  | 3.55012300  |
| C | 0.87424400  | 2.15636800  | 2.46597900  |
| C | -0.03957100 | 1.22109700  | 1.97321500  |
| C | -0.18886000 | 0.00728100  | 2.64577500  |
| C | 0.60432100  | -0.31243500 | 3.73741100  |
| C | 1.56814000  | 0.60301700  | 4.17349300  |
| H | 2.41225600  | 2.57650700  | 3.89720400  |
| H | -0.93071300 | -0.69250300 | 2.27285800  |
| H | 0.48537400  | -1.26667200 | 4.23917700  |
| H | 2.20744100  | 0.36083800  | 5.01644900  |
| C | -0.90836200 | 1.55547500  | 0.78786100  |
| O | -2.14768500 | 1.46236400  | 0.89218600  |
| O | 0.99778300  | 3.40543500  | 1.93810800  |
| C | -0.06679900 | 3.81963600  | 1.08635800  |
| H | -0.97606200 | 3.97299200  | 1.68198800  |
| H | 0.24102800  | 4.77003900  | 0.64636900  |
| C | -0.40199600 | 2.80741400  | -0.02672000 |
| C | 0.73953800  | 2.61997300  | -1.01367800 |
| C | 2.03830600  | 3.08555200  | -0.78800500 |
| C | 0.45605000  | 2.01348400  | -2.24440200 |
| C | 3.03059700  | 2.91955700  | -1.75752200 |
| H | 2.29343700  | 3.57425400  | 0.14474300  |
| C | 1.44965200  | 1.81763200  | -3.19540500 |
| H | -0.55895800 | 1.68844100  | -2.44265000 |
| C | 2.74807400  | 2.27066800  | -2.95437300 |
| H | 4.03163200  | 3.29255300  | -1.56324300 |
| H | 1.20962400  | 1.32393800  | -4.13193100 |
| H | 3.52464600  | 2.13018700  | -3.69973500 |
| C | 3.33885500  | -3.05182500 | 0.35652400  |
| C | 4.06613200  | -1.95265100 | -0.43930500 |
| C | 2.58607200  | -0.79329700 | 0.83600200  |
| C | 2.27356500  | -2.26517200 | 1.17477700  |
| H | 2.93299000  | -3.82691500 | -0.29399500 |
| H | 4.05214600  | -3.55407500 | 1.01612300  |
| H | 1.24310600  | -2.53575500 | 0.91862400  |
| H | 2.37422100  | -2.44153500 | 2.24820900  |

|    |             |             |             |
|----|-------------|-------------|-------------|
| C  | 4.12199900  | -0.80435000 | 0.61758400  |
| C  | 3.06908900  | -1.36034700 | -1.47175800 |
| H  | 3.60705300  | -0.68144000 | -2.13975100 |
| C  | 2.09073800  | -0.50290600 | -0.59292400 |
| H  | 2.21131400  | 0.55189700  | -0.83521200 |
| H  | 2.23091000  | -0.06924400 | 1.56974800  |
| C  | 0.28096800  | -1.93520000 | -1.52198600 |
| C  | 1.26125200  | -2.91140400 | -2.07703600 |
| C  | -0.40554900 | -0.13764000 | -0.39655600 |
| H  | 0.87277100  | -3.31853700 | -3.01250200 |
| N  | 0.68537600  | -0.82249100 | -0.83585800 |
| O  | 2.49581900  | -2.29830700 | -2.37574800 |
| H  | 1.36350000  | -3.74173500 | -1.36871300 |
| N  | -1.01228300 | -2.02584600 | -1.55180200 |
| N  | -1.41195000 | -0.91415300 | -0.84342000 |
| C  | -2.79521800 | -0.84472600 | -0.51434900 |
| C  | -3.30436500 | -1.68635700 | 0.47738400  |
| C  | -3.68133000 | -0.01124800 | -1.19419000 |
| C  | -4.64948800 | -1.67384600 | 0.82067200  |
| C  | -5.03045300 | 0.02687600  | -0.86896700 |
| C  | -5.49347800 | -0.80443500 | 0.14281200  |
| H  | -5.02547700 | -2.32923900 | 1.59623700  |
| H  | -5.70313700 | 0.68893100  | -1.39982800 |
| Cl | -3.10848200 | 1.00073500  | -2.47364100 |
| Cl | -7.17944800 | -0.76782400 | 0.56031100  |
| Cl | -2.24962900 | -2.79209600 | 1.30302700  |
| C  | 5.37086500  | -2.39236900 | -1.07293300 |
| H  | 5.87477000  | -1.55358700 | -1.56528400 |
| H  | 6.05083000  | -2.80998500 | -0.32400900 |
| H  | 5.18531200  | -3.16308400 | -1.82769200 |
| C  | 4.89332800  | -1.15062900 | 1.89565000  |
| H  | 5.94636100  | -1.34104000 | 1.66373100  |
| H  | 4.85405300  | -0.29817600 | 2.58217500  |
| H  | 4.50245300  | -2.01886400 | 2.42705300  |
| C  | 4.70360200  | 0.51590700  | 0.09675500  |
| H  | 4.41604800  | 1.33818000  | 0.76237800  |
| H  | 5.79688600  | 0.46190100  | 0.08663700  |
| H  | 4.38046100  | 0.78556200  | -0.90968200 |
| O  | -1.51132900 | 3.31090300  | -0.72523900 |
| H  | -2.26647400 | 2.81362900  | -0.34683700 |

**M4RR**

Total Energy= -3159.81109914

Sum of electronic and zero-point Energies= -3159.202738

|                                              |             |             |              |
|----------------------------------------------|-------------|-------------|--------------|
| Sum of electronic and thermal Energies=      |             |             | -3159.164602 |
| Sum of electronic and thermal Enthalpies=    |             |             | -3159.163658 |
| Sum of electronic and thermal Free Energies= |             |             | -3159.273494 |
| C                                            | -2.66136200 | 3.34442200  | 0.80392600   |
| C                                            | -1.37477100 | 2.95983900  | 0.41675400   |
| C                                            | -0.51706200 | 2.34978300  | 1.34142800   |
| C                                            | -0.97713300 | 2.08175700  | 2.63403600   |
| C                                            | -2.26311000 | 2.43351600  | 3.01585000   |
| C                                            | -3.09570500 | 3.08186600  | 2.09608000   |
| H                                            | -3.30113500 | 3.83044700  | 0.07533300   |
| H                                            | -0.29173600 | 1.59874500  | 3.32381300   |
| H                                            | -2.61628900 | 2.22287200  | 4.01905600   |
| H                                            | -4.09998900 | 3.37481500  | 2.38695500   |
| C                                            | 0.88073800  | 2.02622700  | 0.96778600   |
| O                                            | -1.01276200 | 3.21352300  | -0.86300600  |
| C                                            | 0.12757600  | 2.51407600  | -1.35678100  |
| H                                            | -0.13126300 | 1.46127800  | -1.51275900  |
| H                                            | 0.37692800  | 3.00289100  | -2.29978500  |
| C                                            | 1.31070500  | 2.59595800  | -0.40179400  |
| C                                            | 2.57294400  | 1.96688100  | -0.96941200  |
| C                                            | 3.75832000  | 2.03442200  | -0.22359300  |
| C                                            | 2.62677200  | 1.43006100  | -2.25723900  |
| C                                            | 4.96516700  | 1.60384000  | -0.76237000  |
| H                                            | 3.73614100  | 2.42048200  | 0.79040200   |
| C                                            | 3.83745300  | 0.99963900  | -2.79946800  |
| H                                            | 1.72982100  | 1.34419800  | -2.86136900  |
| C                                            | 5.01111500  | 1.09479300  | -2.05914100  |
| H                                            | 5.87190200  | 1.66332500  | -0.16850100  |
| H                                            | 3.85691400  | 0.59110200  | -3.80515900  |
| H                                            | 5.95423500  | 0.76124700  | -2.48122600  |
| C                                            | -4.02508100 | -2.14387500 | -1.68653100  |
| C                                            | -4.85658200 | -1.32999400 | -0.66815600  |
| C                                            | -3.12853300 | 0.04518700  | -1.21154400  |
| C                                            | -2.86757300 | -1.18795900 | -2.09191600  |
| H                                            | -3.67982300 | -3.08864100 | -1.26450900  |
| H                                            | -4.64559100 | -2.41023000 | -2.54693100  |
| H                                            | -1.87591600 | -1.61692500 | -1.92946500  |
| H                                            | -2.92466900 | -0.91757300 | -3.14854000  |
| C                                            | -4.68121600 | 0.12775300  | -1.21127800  |
| C                                            | -4.06295400 | -1.21769700 | 0.65095300   |
| H                                            | -4.67162400 | -0.64942200 | 1.35880500   |
| C                                            | -2.82824500 | -0.33912400 | 0.25782200   |
| H                                            | -2.76683600 | 0.54910000  | 0.89175100   |
| H                                            | -2.60704700 | 0.95628600  | -1.52323700  |

|    |             |             |             |
|----|-------------|-------------|-------------|
| C  | -1.46830100 | -2.35533000 | 0.84579600  |
| C  | -2.66689600 | -3.19927900 | 1.12482000  |
| C  | -0.33600600 | -0.53290000 | 0.16176200  |
| H  | -2.48973700 | -3.78587000 | 2.02957300  |
| N  | -1.57174400 | -1.05620600 | 0.42662600  |
| O  | -3.81944500 | -2.42146200 | 1.36605000  |
| H  | -2.81121200 | -3.90604600 | 0.29932300  |
| N  | -0.22593100 | -2.72816300 | 0.90258300  |
| N  | 0.43395600  | -1.59181800 | 0.48152900  |
| C  | 1.84584700  | -1.60422100 | 0.41088100  |
| C  | 2.62109200  | -1.52344800 | 1.56965100  |
| C  | 2.49418500  | -1.71478400 | -0.82070800 |
| C  | 4.00882800  | -1.52245000 | 1.50895200  |
| C  | 3.87905300  | -1.72425500 | -0.90977500 |
| C  | 4.61458200  | -1.61758500 | 0.26295000  |
| H  | 4.59912300  | -1.44928800 | 2.41394000  |
| H  | 4.36867800  | -1.80728800 | -1.87151000 |
| Cl | 1.56094800  | -1.87172700 | -2.27474600 |
| Cl | 6.35116200  | -1.60253900 | 0.16370800  |
| Cl | 1.84708800  | -1.42438300 | 3.11537600  |
| C  | -6.26885900 | -1.84280800 | -0.47060700 |
| H  | -6.82754600 | -1.21523800 | 0.23178600  |
| H  | -6.81256400 | -1.86606900 | -1.42028600 |
| H  | -6.24854100 | -2.85956900 | -0.06584200 |
| C  | -5.28764600 | 0.33568800  | -2.60308000 |
| H  | -5.05884500 | -0.46326100 | -3.30954500 |
| H  | -6.37741400 | 0.40941300  | -2.52673900 |
| H  | -4.92284900 | 1.27602500  | -3.02931700 |
| C  | -5.25519800 | 1.23497400  | -0.31695600 |
| H  | -6.33361500 | 1.09479400  | -0.18662900 |
| H  | -4.80168500 | 1.30427200  | 0.67334700  |
| H  | -5.10804000 | 2.20551800  | -0.80166300 |
| O  | 1.66086100  | 1.50907700  | 1.74135800  |
| O  | 1.50258700  | 3.99245500  | -0.16263200 |
| H  | 2.30709400  | 4.10038400  | 0.36126700  |

#### **M4RS**

Total Energy= -3159.82926356

Sum of electronic and zero-point Energies= -3159.220563

Sum of electronic and thermal Energies= -3159.182917

Sum of electronic and thermal Enthalpies= -3159.181973

Sum of electronic and thermal Free Energies= -3159.289994

|   |            |            |             |
|---|------------|------------|-------------|
| C | 4.75231300 | 1.96507400 | -0.86997500 |
| C | 3.40712400 | 2.14343900 | -0.53051100 |

|   |             |             |             |
|---|-------------|-------------|-------------|
| C | 2.40028500  | 1.57638900  | -1.32761300 |
| C | 2.75379200  | 0.90679300  | -2.50691300 |
| C | 4.08188600  | 0.76007200  | -2.86666500 |
| C | 5.07936300  | 1.27559600  | -2.02744600 |
| H | 5.51341200  | 2.39080600  | -0.22534500 |
| H | 1.95290600  | 0.49795600  | -3.11426400 |
| H | 4.35064500  | 0.23957100  | -3.77946300 |
| H | 6.12530600  | 1.14838100  | -2.28926000 |
| C | 0.98512500  | 1.63338200  | -0.89801000 |
| O | 0.08388800  | 1.12425800  | -1.53769400 |
| O | 3.13575500  | 2.88367400  | 0.56769000  |
| C | 1.80856900  | 3.39217500  | 0.65267200  |
| H | 1.66615500  | 4.17056800  | -0.10956200 |
| H | 1.71414900  | 3.83109300  | 1.64717800  |
| C | 0.76425800  | 2.29125500  | 0.48261000  |
| O | 1.05720700  | 1.32445100  | 1.45621600  |
| C | -0.63042400 | 2.87565500  | 0.62090700  |
| C | -1.33613000 | 2.69491400  | 1.81050700  |
| C | -1.21161600 | 3.61439100  | -0.41338100 |
| C | -2.61226500 | 3.23314700  | 1.96162200  |
| H | -0.87768400 | 2.12151600  | 2.60919500  |
| C | -2.48656500 | 4.15296200  | -0.26320300 |
| H | -0.67852000 | 3.75160100  | -1.35018300 |
| C | -3.19092600 | 3.96182600  | 0.92459800  |
| H | -3.15597800 | 3.08015100  | 2.88906500  |
| H | -2.93350100 | 4.71703700  | -1.07591200 |
| H | -4.18672500 | 4.37964100  | 1.03948300  |
| C | -4.11536500 | -1.29989500 | -1.93178100 |
| C | -4.94421700 | -1.11688700 | -0.64666800 |
| C | -3.16907500 | 0.27544100  | -0.34714300 |
| C | -2.88312500 | -0.37835400 | -1.71333700 |
| H | -3.86789800 | -2.34712600 | -2.11072000 |
| H | -4.70525400 | -0.98109000 | -2.79612800 |
| H | -1.92837300 | -0.91208300 | -1.72166500 |
| H | -2.80561100 | 0.38683800  | -2.48845500 |
| C | -4.71790000 | 0.40232400  | -0.34307700 |
| C | -4.17326900 | -1.75615300 | 0.53481100  |
| H | -4.81174200 | -1.71410500 | 1.42097700  |
| C | -2.96167700 | -0.78743300 | 0.75000500  |
| H | -3.00206800 | -0.32842100 | 1.73968500  |
| H | -2.60452300 | 1.19249300  | -0.16136200 |
| C | -1.51934400 | -2.77121700 | 0.25815000  |
| C | -2.68594300 | -3.60928600 | -0.14524900 |
| C | -0.47515500 | -0.90485200 | 0.90723700  |

|    |             |             |             |
|----|-------------|-------------|-------------|
| H  | -2.53963200 | -4.63104400 | 0.21198500  |
| N  | -1.68228500 | -1.47610000 | 0.67249200  |
| O  | -3.89103500 | -3.14763300 | 0.42832500  |
| H  | -2.73203300 | -3.64454500 | -1.23982600 |
| N  | -0.26215900 | -3.09460600 | 0.21815000  |
| N  | 0.35145600  | -1.92676700 | 0.61171900  |
| C  | 1.76267000  | -1.81047800 | 0.59744900  |
| C  | 2.47206800  | -1.92679500 | -0.60181500 |
| C  | 2.47324100  | -1.50664900 | 1.76331400  |
| C  | 3.84924000  | -1.75134700 | -0.64785900 |
| C  | 3.84652100  | -1.30271200 | 1.73734700  |
| C  | 4.51494200  | -1.42916900 | 0.52671700  |
| H  | 4.38137800  | -1.83933200 | -1.58651000 |
| H  | 4.38007100  | -1.05737900 | 2.64698500  |
| Cl | 1.65306100  | -1.38872400 | 3.28524200  |
| Cl | 6.23622500  | -1.18771800 | 0.48198200  |
| Cl | 1.63315300  | -2.26197700 | -2.08000200 |
| C  | -6.37261600 | -1.61264900 | -0.75190300 |
| H  | -6.93046600 | -1.42724800 | 0.17236700  |
| H  | -6.89818000 | -1.12012700 | -1.57607300 |
| H  | -6.38498300 | -2.69116900 | -0.93884600 |
| C  | -5.23976400 | 1.34833000  | -1.42891300 |
| H  | -6.33480200 | 1.34615400  | -1.44123800 |
| H  | -4.91036200 | 2.36852100  | -1.20258600 |
| H  | -4.89207500 | 1.10371800  | -2.43335300 |
| C  | -5.32914200 | 0.88695900  | 0.97946300  |
| H  | -5.04427400 | 1.92863400  | 1.15249400  |
| H  | -6.42174000 | 0.84683500  | 0.91807500  |
| H  | -5.03087000 | 0.31806600  | 1.86233500  |
| H  | 0.39494200  | 0.57404000  | 1.33966100  |

#### **M4SR**

Total Energy= -3159.81702519

Sum of electronic and zero-point Energies= -3159.208013

Sum of electronic and thermal Energies= -3159.169973

Sum of electronic and thermal Enthalpies= -3159.169029

Sum of electronic and thermal Free Energies= -3159.279513

|   |             |            |             |
|---|-------------|------------|-------------|
| C | 1.44151100  | 3.82493700 | -0.11970000 |
| C | 0.36819800  | 2.94764500 | -0.30636700 |
| C | -0.11698800 | 2.19880300 | 0.77803300  |
| C | 0.50106300  | 2.30817600 | 2.03037600  |
| C | 1.56749800  | 3.17191700 | 2.21643900  |
| C | 2.02440300  | 3.93654700 | 1.13464400  |
| H | 1.79465500  | 4.40324300 | -0.96659900 |

|   |             |             |             |
|---|-------------|-------------|-------------|
| H | 0.10762700  | 1.70668400  | 2.84418400  |
| H | 2.03953900  | 3.26365800  | 3.18810600  |
| H | 2.85022300  | 4.62751800  | 1.27343400  |
| C | -1.29413200 | 1.33730900  | 0.58852500  |
| O | -1.70346400 | 0.52982900  | 1.40417600  |
| O | -0.16488300 | 2.88289100  | -1.54827200 |
| C | -1.04626500 | 1.78787800  | -1.82279600 |
| H | -1.54256700 | 2.02575600  | -2.76556400 |
| H | -0.46363700 | 0.86647300  | -1.91330300 |
| C | -2.06874800 | 1.56759400  | -0.71202400 |
| O | -2.79833700 | 0.40533800  | -1.02456600 |
| C | -3.01564200 | 2.74712500  | -0.47389100 |
| C | -4.02289500 | 2.58482000  | 0.48374500  |
| C | -2.93819900 | 3.94791200  | -1.18000700 |
| C | -4.94029000 | 3.59946100  | 0.72631600  |
| H | -4.08371400 | 1.65243400  | 1.03859000  |
| C | -3.86064700 | 4.96583600  | -0.93699300 |
| H | -2.15902300 | 4.10210100  | -1.91811300 |
| C | -4.86191300 | 4.79555400  | 0.01318000  |
| H | -5.71725200 | 3.45819000  | 1.47069600  |
| H | -3.79377900 | 5.89336600  | -1.49665400 |
| H | -5.57882200 | 5.58891000  | 0.19855400  |
| C | 4.93875600  | -0.90026300 | 1.30712100  |
| C | 5.23372000  | -0.43481700 | -0.12924800 |
| C | 3.22075000  | 0.51247900  | 0.32643200  |
| C | 3.52300200  | -0.32016100 | 1.59005600  |
| H | 5.01372000  | -1.98422600 | 1.40483500  |
| H | 5.68395500  | -0.48045200 | 1.98852500  |
| H | 2.76554300  | -1.09268600 | 1.75794700  |
| H | 3.51576600  | 0.31405300  | 2.47966300  |
| C | 4.62524700  | 1.00551700  | -0.11369300 |
| C | 4.24954400  | -1.17156000 | -1.07877700 |
| H | 4.55718800  | -0.99693000 | -2.11381500 |
| C | 2.88435700  | -0.44683300 | -0.82591500 |
| H | 2.58586500  | 0.12199800  | -1.70812400 |
| H | 2.46451200  | 1.28696700  | 0.46323100  |
| C | 1.97139000  | -2.68864500 | -0.25093700 |
| C | 3.34128500  | -3.26744100 | -0.14065800 |
| C | 0.46934100  | -1.03825100 | -0.56335600 |
| H | 3.32683000  | -4.30999600 | -0.46388200 |
| N | 1.79542100  | -1.36846900 | -0.56107200 |
| O | 4.25973700  | -2.59356000 | -0.98027000 |
| H | 3.65028500  | -3.24727400 | 0.91108700  |
| N | 0.83149900  | -3.27420200 | -0.04473900 |

|    |             |             |             |
|----|-------------|-------------|-------------|
| N  | -0.05997300 | -2.23647800 | -0.23754700 |
| C  | -1.44051000 | -2.47602500 | -0.05159100 |
| C  | -1.97123200 | -2.58343400 | 1.23706800  |
| C  | -2.30478400 | -2.59816000 | -1.14191800 |
| C  | -3.32950300 | -2.78768800 | 1.44437000  |
| C  | -3.66876400 | -2.79687800 | -0.96338000 |
| C  | -4.15893100 | -2.88914400 | 0.33350200  |
| H  | -3.72856900 | -2.86054300 | 2.44829700  |
| H  | -4.32933600 | -2.87554200 | -1.81772100 |
| Cl | -1.68143800 | -2.48610000 | -2.75193200 |
| Cl | -5.86225200 | -3.13874500 | 0.57567300  |
| Cl | -0.92170800 | -2.44316100 | 2.60583500  |
| C  | 6.68093800  | -0.58568900 | -0.55348200 |
| H  | 6.84468500  | -0.18389700 | -1.55932000 |
| H  | 7.35080900  | -0.06542500 | 0.13820300  |
| H  | 6.96301400  | -1.64335000 | -0.56420000 |
| C  | 5.27140800  | 1.95406400  | 0.90085400  |
| H  | 6.33218400  | 2.09665100  | 0.66854500  |
| H  | 4.78587100  | 2.93329900  | 0.83826000  |
| H  | 5.19368600  | 1.61525200  | 1.93483300  |
| C  | 4.65570200  | 1.72751000  | -1.46802000 |
| H  | 3.97499200  | 2.58578400  | -1.44272600 |
| H  | 5.66287400  | 2.10962800  | -1.66248400 |
| H  | 4.37700900  | 1.10736100  | -2.32209500 |
| H  | -2.81741600 | -0.12142400 | -0.20766300 |

#### M4SS

Total Energy= -3159.81841095

Sum of electronic and zero-point Energies= -3159.209892

Sum of electronic and thermal Energies= -3159.171935

Sum of electronic and thermal Enthalpies= -3159.170990

Sum of electronic and thermal Free Energies= -3159.280821

|   |             |            |            |
|---|-------------|------------|------------|
| C | 2.78327700  | 2.63400400 | 2.41730500 |
| C | 1.93853800  | 2.91775500 | 1.33926300 |
| C | 0.59842000  | 2.50584200 | 1.37129200 |
| C | 0.10881000  | 1.81977500 | 2.49082400 |
| C | 0.93914300  | 1.54643700 | 3.56347500 |
| C | 2.27937400  | 1.95534400 | 3.51709500 |
| H | 3.81155400  | 2.97708900 | 2.38033900 |
| H | -0.92706400 | 1.49982500 | 2.47106400 |
| H | 0.56129300  | 1.01453900 | 4.42942400 |
| H | 2.93653100  | 1.74537800 | 4.35542000 |
| C | -0.28794400 | 2.83629700 | 0.24464300 |
| O | -1.50119200 | 2.73717100 | 0.26642300 |



|   |             |             |             |
|---|-------------|-------------|-------------|
| O | 2.46486300  | 3.61188800  | 0.29654200  |
| C | 1.52384000  | 4.30258000  | -0.52270400 |
| H | 1.07203300  | 5.12434100  | 0.04698600  |
| H | 2.08389200  | 4.71977800  | -1.36122100 |
| C | 0.40136600  | 3.39011900  | -1.01046300 |
| C | 0.87379000  | 2.22213700  | -1.87456000 |
| C | 2.19407400  | 2.07828600  | -2.30704000 |
| C | -0.08276900 | 1.28853000  | -2.28599400 |
| C | 2.54862900  | 1.01368600  | -3.13651000 |
| H | 2.95907800  | 2.77940700  | -1.99019600 |
| C | 0.27467000  | 0.21784900  | -3.09857100 |
| H | -1.10905700 | 1.38959300  | -1.94315400 |
| C | 1.59366800  | 0.07812400  | -3.52717900 |
| H | 3.57767600  | 0.91292900  | -3.46891500 |
| H | -0.47448500 | -0.51483900 | -3.38501200 |
| H | 1.87805800  | -0.76383200 | -4.15039700 |
| C | 3.13626900  | -3.33863800 | 0.96702500  |
| C | 3.80130100  | -2.33747300 | 0.00597800  |
| C | 2.40460900  | -1.03875800 | 1.24179300  |
| C | 2.13974000  | -2.46165100 | 1.77653100  |
| H | 2.67174400  | -4.16694300 | 0.42969400  |
| H | 3.89366300  | -3.78640600 | 1.61713700  |
| H | 1.09603200  | -2.75888200 | 1.63549400  |
| H | 2.33628200  | -2.51707300 | 2.84955300  |
| C | 3.92140700  | -1.06668000 | 0.91157600  |
| C | 2.73536400  | -1.86180700 | -1.01345700 |
| H | 3.23108800  | -1.24996400 | -1.77157100 |
| C | 1.80167500  | -0.93138200 | -0.16803500 |
| H | 1.86456400  | 0.09732600  | -0.53036700 |
| H | 2.07212400  | -0.23390600 | 1.90159700  |
| C | -0.05891200 | -2.42446900 | -0.87455900 |
| C | 0.89024700  | -3.45610600 | -1.38257200 |
| C | -0.63526900 | -0.51793000 | 0.18332300  |
| H | 0.46326700  | -3.94736600 | -2.25923600 |
| N | 0.39940200  | -1.29378600 | -0.25964100 |
| O | 2.11693100  | -2.88303800 | -1.79115200 |
| H | 1.02994300  | -4.21873900 | -0.60675200 |
| N | -1.35681500 | -2.46429200 | -0.87361800 |
| N | -1.67378000 | -1.28720100 | -0.21784600 |
| C | -3.03215300 | -0.98768500 | 0.03102700  |
| C | -3.55511000 | -1.05802500 | 1.32640400  |
| C | -3.89461800 | -0.62345800 | -1.00630100 |
| C | -4.88618500 | -0.75880700 | 1.58957400  |
| C | -5.23225700 | -0.32975800 | -0.77457800 |

|    |             |             |             |
|----|-------------|-------------|-------------|
| C  | -5.70707900 | -0.39932800 | 0.52852300  |
| H  | -5.27254100 | -0.81649700 | 2.59961900  |
| H  | -5.88213900 | -0.04647000 | -1.59305500 |
| Cl | -3.29274400 | -0.51298000 | -2.62875900 |
| Cl | -7.37689900 | -0.02988900 | 0.84007800  |
| Cl | -2.54192700 | -1.54806500 | 2.64533900  |
| C  | 5.06306900  | -2.85044400 | -0.65844700 |
| H  | 5.52088700  | -2.08070600 | -1.28905000 |
| H  | 5.79925600  | -3.16851200 | 0.08665800  |
| H  | 4.83216100  | -3.71113700 | -1.29429700 |
| C  | 4.79905200  | -1.25519400 | 2.15207400  |
| H  | 5.84452100  | -1.40068700 | 1.86020200  |
| H  | 4.75158800  | -0.35143000 | 2.76962400  |
| H  | 4.50584100  | -2.09863400 | 2.77903500  |
| C  | 4.44911700  | 0.18137700  | 0.18966100  |
| H  | 4.36001500  | 1.05216800  | 0.84699500  |
| H  | 5.51112800  | 0.05248600  | -0.04517400 |
| H  | 3.93390600  | 0.42754900  | -0.74156700 |
| O  | -0.51628300 | 4.18794300  | -1.71882300 |
| H  | -1.39524900 | 3.92743200  | -1.39675300 |

### **PIR**

Total Energy= -804.18148197

Sum of electronic and zero-point Energies= -803.942923

Sum of electronic and thermal Energies= -803.928949

Sum of electronic and thermal Enthalpies= -803.928005

Sum of electronic and thermal Free Energies= -803.984634

|   |             |             |             |
|---|-------------|-------------|-------------|
| C | 3.64737400  | -1.04880800 | 0.03999500  |
| C | 2.27484400  | -0.78555000 | 0.02408200  |
| C | 1.81073000  | 0.51929200  | -0.19545200 |
| C | 2.73399400  | 1.54967600  | -0.42133300 |
| C | 4.09299000  | 1.29222700  | -0.41685500 |
| C | 4.54252400  | -0.01306500 | -0.17654600 |
| H | 3.98159500  | -2.06563200 | 0.21315700  |
| H | 2.34496600  | 2.54999400  | -0.58305200 |
| H | 4.80538500  | 2.09106700  | -0.58839100 |
| H | 5.60732500  | -0.22312400 | -0.16649500 |
| C | 0.36625900  | 0.82339500  | -0.10802200 |
| O | -0.10106600 | 1.91523100  | -0.35025300 |
| H | -0.76507100 | -1.01788200 | 2.21935700  |
| O | 1.44020500  | -1.83359300 | 0.22471100  |
| C | 0.09531800  | -1.63707200 | -0.18753700 |
| H | 0.06424000  | -1.59620100 | -1.28430000 |
| H | -0.46023600 | -2.51414800 | 0.15364100  |

|   |             |             |             |
|---|-------------|-------------|-------------|
| C | -0.49304600 | -0.35540900 | 0.40645400  |
| O | -0.24653100 | -0.31471600 | 1.80446800  |
| C | -1.96277900 | -0.16784600 | 0.08808000  |
| C | -2.60937900 | -0.84816200 | -0.94567900 |
| C | -2.69086400 | 0.73869000  | 0.86470600  |
| C | -3.96410000 | -0.63043300 | -1.19271300 |
| H | -2.07373300 | -1.55590600 | -1.57027900 |
| C | -4.04072300 | 0.95768100  | 0.61606200  |
| H | -2.18530200 | 1.26315300  | 1.66843200  |
| C | -4.68207700 | 0.27174600  | -0.41445700 |
| H | -4.45593600 | -1.16968900 | -1.99574500 |
| H | -4.59414700 | 1.66423900  | 1.22627700  |
| H | -5.73633200 | 0.44056200  | -0.60872000 |

### P1S

Total Energy= -804.18910320

Sum of electronic and zero-point Energies= -803.949840

Sum of electronic and thermal Energies= -803.936187

Sum of electronic and thermal Enthalpies= -803.935242

Sum of electronic and thermal Free Energies= -803.990663

|   |             |             |             |
|---|-------------|-------------|-------------|
| C | -2.74861500 | -1.41604200 | 0.69191800  |
| C | -1.72404200 | -0.46650100 | 0.71418600  |
| C | -1.55980700 | 0.41143400  | -0.36861600 |
| C | -2.44325100 | 0.34862200  | -1.45501800 |
| C | -3.46025500 | -0.58761300 | -1.47785900 |
| C | -3.60170900 | -1.47171800 | -0.39957600 |
| H | -2.85917100 | -2.08526400 | 1.53768400  |
| H | -2.29247900 | 1.04550700  | -2.27334800 |
| H | -4.13983100 | -0.64177500 | -2.32046000 |
| H | -4.39720900 | -2.21014800 | -0.41055300 |
| C | -0.44769100 | 1.37066900  | -0.36013200 |
| O | -0.32553500 | 2.29840400  | -1.14128800 |
| H | 1.08520600  | 2.92813300  | 0.22947400  |
| O | -0.92238100 | -0.44145700 | 1.80744200  |
| C | -0.11957200 | 0.72280800  | 1.98592200  |
| H | -0.75350700 | 1.56217500  | 2.29753400  |
| H | 0.58606400  | 0.49333900  | 2.78634800  |
| C | 0.61756100  | 1.13392600  | 0.71316300  |
| O | 1.28102000  | 2.34431500  | 0.98065400  |
| C | 1.59195000  | 0.08430800  | 0.17639000  |
| C | 2.32556300  | 0.41144700  | -0.96928300 |
| C | 1.80219100  | -1.15139800 | 0.78858800  |
| C | 3.25784600  | -0.47706600 | -1.49055900 |
| H | 2.16216500  | 1.37217100  | -1.45032000 |

|   |            |             |             |
|---|------------|-------------|-------------|
| C | 2.73993800 | -2.04196200 | 0.26566500  |
| H | 1.23500300 | -1.43395200 | 1.66841400  |
| C | 3.46863500 | -1.70881600 | -0.87111900 |
| H | 3.82126700 | -0.20943800 | -2.37854300 |
| H | 2.89838500 | -2.99884500 | 0.75246800  |
| H | 4.19682000 | -2.40458300 | -1.27518100 |

**Re-TS5<sup>D</sup>**

Total Energy= -3159.76362710

Sum of electronic and zero-point Energies= -3159.160595

Sum of electronic and thermal Energies= -3159.122746

Sum of electronic and thermal Enthalpies= -3159.121802

Sum of electronic and thermal Free Energies= -3159.235213

|   |             |             |             |
|---|-------------|-------------|-------------|
| C | -0.07849000 | 3.67054800  | 2.12154200  |
| C | 0.11392500  | 2.78563500  | 1.06123200  |
| C | -0.25652000 | 1.43564200  | 1.20076400  |
| C | -0.76697000 | 0.99849200  | 2.42447300  |
| C | -0.96031100 | 1.88329200  | 3.48178000  |
| C | -0.62228000 | 3.22527600  | 3.32096400  |
| H | 0.23007500  | 4.69996100  | 1.98020600  |
| H | -1.03193100 | -0.04921100 | 2.55554800  |
| H | -1.36573700 | 1.52511100  | 4.42183000  |
| H | -0.76551800 | 3.92548700  | 4.13775300  |
| C | -0.01887300 | 0.51483800  | 0.00433800  |
| O | 1.30515400  | 0.18555200  | -0.17532300 |
| H | -0.44236300 | 1.03799300  | -0.87888800 |
| O | 0.59210000  | 3.28470900  | -0.11190200 |
| C | 1.80434100  | 2.68777800  | -0.61807200 |
| H | 1.79160800  | 2.76983000  | -1.70682100 |
| C | 2.99294000  | 3.22690200  | 0.00868900  |
| O | 2.98731800  | 3.90308900  | 1.04044700  |
| C | 4.31171000  | 2.84205700  | -0.61874000 |
| C | 4.44051500  | 1.79081100  | -1.53293800 |
| C | 5.44365900  | 3.58069400  | -0.26554500 |
| C | 5.68105900  | 1.49719700  | -2.09316300 |
| H | 3.57569900  | 1.18592100  | -1.79022700 |
| C | 6.68199900  | 3.29086200  | -0.82773800 |
| H | 5.32555400  | 4.38100200  | 0.45784400  |
| C | 6.80248200  | 2.24865700  | -1.74596400 |
| H | 5.77470300  | 0.67627400  | -2.79724800 |
| H | 7.55448400  | 3.87468000  | -0.55105000 |
| H | 7.76835500  | 2.01891000  | -2.18520300 |
| C | -5.27267000 | -0.62434600 | -1.89111600 |
| C | -5.50159200 | 0.27418400  | -0.66516400 |

|    |             |             |             |
|----|-------------|-------------|-------------|
| C  | -3.40465500 | 0.83453100  | -1.34781900 |
| C  | -3.80760500 | -0.30769700 | -2.30520500 |
| H  | -5.46745000 | -1.67398400 | -1.66830800 |
| H  | -5.97515400 | -0.34899200 | -2.68172300 |
| H  | -3.13793500 | -1.17047100 | -2.22090100 |
| H  | -3.74485900 | 0.02197900  | -3.34370200 |
| C  | -4.74809100 | 1.57609600  | -1.09199800 |
| C  | -4.59124200 | -0.23700100 | 0.48208100  |
| H  | -4.86226900 | 0.27236300  | 1.41007800  |
| C  | -3.16137200 | 0.24574800  | 0.05189400  |
| H  | -2.79794300 | 1.01334200  | 0.73584400  |
| H  | -2.58660800 | 1.46583200  | -1.70420300 |
| C  | -2.49046900 | -2.16449400 | 0.22685100  |
| C  | -3.91723500 | -2.59613000 | 0.22934700  |
| C  | -0.83920400 | -0.73870300 | 0.11741900  |
| H  | -4.01747500 | -3.50101700 | 0.83072500  |
| N  | -2.17907800 | -0.83727800 | 0.12208700  |
| O  | -4.73748500 | -1.61188500 | 0.82149100  |
| H  | -4.21254300 | -2.83706000 | -0.79780700 |
| N  | -1.41777900 | -2.89714700 | 0.28366000  |
| N  | -0.39689700 | -1.99049200 | 0.21145600  |
| C  | 0.94399400  | -2.47479300 | 0.18875100  |
| C  | 1.59242700  | -2.67082200 | -1.02986800 |
| C  | 1.58430500  | -2.81658700 | 1.37529500  |
| C  | 2.87613000  | -3.19099700 | -1.07047400 |
| C  | 2.87050900  | -3.34151400 | 1.35922700  |
| C  | 3.49567800  | -3.51922900 | 0.13171000  |
| H  | 3.38199900  | -3.33299300 | -2.01718900 |
| H  | 3.37039100  | -3.59966900 | 2.28442500  |
| Cl | 0.78063500  | -2.56909600 | 2.88723600  |
| Cl | 5.10473600  | -4.17075200 | 0.09306400  |
| Cl | 0.79103900  | -2.23654700 | -2.49977000 |
| C  | -6.95059200 | 0.40687500  | -0.24111600 |
| H  | -7.05807900 | 1.11685100  | 0.58561700  |
| H  | -7.57272900 | 0.74881100  | -1.07337300 |
| H  | -7.33654700 | -0.56110700 | 0.09329600  |
| C  | -5.30383200 | 2.24136000  | -2.35494700 |
| H  | -6.33646000 | 2.56344400  | -2.18692600 |
| H  | -4.71469400 | 3.13438300  | -2.58509900 |
| H  | -5.28926500 | 1.60131800  | -3.23777800 |
| C  | -4.68780000 | 2.66595500  | -0.01100800 |
| H  | -3.93745700 | 3.41653100  | -0.27972300 |
| H  | -5.65485500 | 3.17422500  | 0.05065700  |
| H  | -4.45141800 | 2.30819800  | 0.99347000  |

|   |            |            |             |
|---|------------|------------|-------------|
| H | 1.73179100 | 1.27676900 | -0.37114900 |
|---|------------|------------|-------------|

**Re-TS5<sup>B</sup>**

Total Energy= -3452.04392507

Sum of electronic and zero-point Energies= -3451.228947

Sum of electronic and thermal Energies= -3451.181259

Sum of electronic and thermal Enthalpies= -3451.180315

Sum of electronic and thermal Free Energies= -3451.309633

|   |             |             |             |
|---|-------------|-------------|-------------|
| C | -1.43739600 | 0.48809500  | 2.84217300  |
| C | -0.96884200 | 0.34491400  | 1.53048000  |
| C | 0.39104600  | 0.55110400  | 1.24032900  |
| C | 1.25298000  | 0.88643100  | 2.27959800  |
| C | 0.80366400  | 1.00608900  | 3.59218700  |
| C | -0.54785100 | 0.81319500  | 3.86448600  |
| H | -2.48792600 | 0.34194100  | 3.06431600  |
| H | 2.29794700  | 1.06604800  | 2.03970800  |
| H | 1.49411100  | 1.26018200  | 4.38969200  |
| H | -0.92129300 | 0.91351300  | 4.87916500  |
| C | 0.93531300  | 0.55218500  | -0.21203500 |
| O | 1.61398400  | 1.64330000  | -0.54724000 |
| O | -1.76005100 | -0.02458000 | 0.49455000  |
| C | -3.14420300 | 0.28394200  | 0.52633200  |
| H | -3.66073300 | -0.10798200 | 1.40209200  |
| C | -3.76421300 | 0.01034000  | -0.73818800 |
| O | -3.14077200 | -0.09025800 | -1.80779700 |
| C | -5.27508500 | -0.05407700 | -0.76937000 |
| C | -6.08990100 | 0.33462000  | 0.30096700  |
| C | -5.87469700 | -0.54148500 | -1.93259200 |
| C | -7.47413100 | 0.22888300  | 0.20746700  |
| H | -5.64654300 | 0.74209700  | 1.20491800  |
| C | -7.25865500 | -0.65592700 | -2.02440700 |
| H | -5.23029900 | -0.82644500 | -2.75766200 |
| C | -8.06253800 | -0.27154900 | -0.95350400 |
| H | -8.09556200 | 0.53933300  | 1.04152500  |
| H | -7.71058900 | -1.04340400 | -2.93225100 |
| H | -9.14243200 | -0.35666900 | -1.02320500 |
| C | 6.56529800  | -0.25018800 | 0.69498400  |
| C | 6.49820100  | 0.43297000  | -0.68195300 |
| C | 4.57109300  | 1.09012000  | 0.33071100  |
| C | 5.21089000  | 0.13374500  | 1.35842900  |
| H | 6.74120400  | -1.32312000 | 0.60602900  |
| H | 7.41143500  | 0.14924600  | 1.26062300  |
| H | 4.57202100  | -0.73311100 | 1.56141500  |
| H | 5.36010700  | 0.63198400  | 2.31885900  |

|    |             |             |             |
|----|-------------|-------------|-------------|
| C  | 5.80050200  | 1.78356400  | -0.31920600 |
| C  | 5.38698400  | -0.26922900 | -1.50700100 |
| H  | 5.43480100  | 0.07856800  | -2.54251000 |
| C  | 4.06377800  | 0.27092300  | -0.86191500 |
| H  | 3.50417500  | 0.92386800  | -1.52708800 |
| H  | 3.78844700  | 1.75450000  | 0.69951800  |
| C  | 3.45674200  | -2.14131200 | -0.55815200 |
| C  | 4.87452700  | -2.55373300 | -0.75209500 |
| C  | 1.80225400  | -0.73038300 | -0.31051900 |
| H  | 4.90155600  | -3.54928800 | -1.19820700 |
| N  | 3.12315300  | -0.81092200 | -0.54156600 |
| O  | 5.53964600  | -1.68102100 | -1.63911000 |
| H  | 5.36056900  | -2.60855500 | 0.22923600  |
| N  | 2.41979500  | -2.90031900 | -0.36209500 |
| N  | 1.40189800  | -2.00166900 | -0.20429300 |
| C  | 0.05895000  | -2.42306200 | -0.01426200 |
| C  | -0.41298300 | -2.72893400 | 1.26266000  |
| C  | -0.81939200 | -2.46683200 | -1.09779200 |
| C  | -1.74700800 | -3.05039200 | 1.46626700  |
| C  | -2.15650100 | -2.79017200 | -0.92017700 |
| C  | -2.59852400 | -3.06514400 | 0.36668600  |
| H  | -2.11341600 | -3.27184900 | 2.46103000  |
| H  | -2.83903400 | -2.78242400 | -1.76005000 |
| Cl | -0.24052100 | -2.08912600 | -2.68434200 |
| Cl | -4.28041700 | -3.42804000 | 0.61438800  |
| Cl | 0.66789900  | -2.67039300 | 2.61192200  |
| C  | 7.82143700  | 0.49793000  | -1.41801200 |
| H  | 7.72324600  | 1.04599200  | -2.36116800 |
| H  | 8.58609800  | 0.99245900  | -0.81105500 |
| H  | 8.17591600  | -0.51129500 | -1.65096000 |
| C  | 6.58491800  | 2.65275600  | 0.66836900  |
| H  | 7.53711500  | 2.96389900  | 0.22616900  |
| H  | 6.01270000  | 3.55958700  | 0.88851500  |
| H  | 6.79929600  | 2.16053800  | 1.61785500  |
| C  | 5.46809800  | 2.67617300  | -1.52363800 |
| H  | 4.75032500  | 3.44688600  | -1.22585600 |
| H  | 6.37468300  | 3.18144600  | -1.87195100 |
| H  | 5.04498600  | 2.14656100  | -2.37910800 |
| N  | -2.73998800 | 2.94337600  | 0.03110000  |
| C  | -2.67141900 | 3.68348600  | 1.31837800  |
| H  | -3.70522500 | 3.86827100  | 1.62775700  |
| H  | -2.23720100 | 2.98252500  | 2.04076200  |
| C  | -1.86155600 | 4.97290000  | 1.32273400  |
| H  | -1.91663900 | 5.41007000  | 2.32289600  |

|   |             |            |             |
|---|-------------|------------|-------------|
| H | -0.80881100 | 4.77886900 | 1.10537100  |
| H | -2.23687000 | 5.70979700 | 0.61050300  |
| C | -1.43388700 | 2.75735600 | -0.67287100 |
| H | -1.52931200 | 1.80469300 | -1.20282300 |
| H | -0.66674200 | 2.62132000 | 0.09324700  |
| C | -0.99775300 | 3.83979500 | -1.64856300 |
| H | -0.93169200 | 4.82950900 | -1.19191200 |
| H | 0.00135600  | 3.55270100 | -1.98627500 |
| H | -1.65284700 | 3.89675500 | -2.52208700 |
| C | -3.87889900 | 3.30370500 | -0.85516900 |
| H | -4.77149400 | 2.86688300 | -0.39167900 |
| H | -3.71513400 | 2.76173200 | -1.79189400 |
| C | -4.11304200 | 4.78718900 | -1.10340900 |
| H | -3.24784100 | 5.27839300 | -1.55112400 |
| H | -4.95554500 | 4.89214700 | -1.79139600 |
| H | -4.37577400 | 5.31115500 | -0.18093800 |
| H | 0.06682300  | 0.28731400 | -0.86064300 |
| H | -3.04393700 | 1.81913600 | 0.35148500  |

### **Re-M03<sup>B</sup>**

Total Energy= -3452.04545589

Sum of electronic and zero-point Energies= -3451.225632

Sum of electronic and thermal Energies= -3451.177628

Sum of electronic and thermal Enthalpies= -3451.176684

Sum of electronic and thermal Free Energies= -3451.307406

|   |             |             |             |
|---|-------------|-------------|-------------|
| C | -1.49085600 | 0.39195400  | 2.94596100  |
| C | -0.99108600 | 0.27337900  | 1.64284300  |
| C | 0.37946800  | 0.46926000  | 1.39003500  |
| C | 1.22184900  | 0.74557000  | 2.46139000  |
| C | 0.74388200  | 0.82619800  | 3.76743200  |
| C | -0.61883100 | 0.66282600  | 3.99912400  |
| H | -2.55065600 | 0.27392200  | 3.13547200  |
| H | 2.27463400  | 0.91626800  | 2.25006600  |
| H | 1.42059500  | 1.03434000  | 4.58957600  |
| H | -1.01571200 | 0.74416900  | 5.00659300  |
| C | 0.94862800  | 0.56490200  | -0.04888800 |
| O | 1.63841800  | 1.67673900  | -0.28764200 |
| O | -1.75912700 | -0.04635000 | 0.57465500  |
| C | -3.15807000 | 0.08651700  | 0.62592900  |
| H | -3.64937300 | -0.34648900 | 1.49022800  |
| C | -3.77856800 | 0.09869900  | -0.62410500 |
| O | -3.17912700 | 0.22830400  | -1.73009200 |
| C | -5.28791500 | 0.01896700  | -0.63483700 |
| C | -6.09061700 | 0.32019900  | 0.47276100  |



|    |             |             |             |
|----|-------------|-------------|-------------|
| C  | -5.90610500 | -0.37043900 | -1.82548600 |
| C  | -7.47566300 | 0.21077200  | 0.39427000  |
| H  | -5.62884800 | 0.66641100  | 1.39333500  |
| C  | -7.29119800 | -0.48577300 | -1.90462000 |
| H  | -5.27298200 | -0.57596200 | -2.68252400 |
| C  | -8.08131600 | -0.19782000 | -0.79364200 |
| H  | -8.08501400 | 0.45478100  | 1.25919900  |
| H  | -7.75618100 | -0.79749100 | -2.83523700 |
| H  | -9.16192400 | -0.28165300 | -0.85418500 |
| C  | 6.61144800  | -0.39207500 | 0.61112700  |
| C  | 6.49687600  | 0.44478800  | -0.67491900 |
| C  | 4.61787700  | 0.99271200  | 0.48245100  |
| C  | 5.28729500  | -0.07764100 | 1.36890700  |
| H  | 6.77201800  | -1.44930000 | 0.39451000  |
| H  | 7.48302700  | -0.06584100 | 1.18518400  |
| H  | 4.64689200  | -0.95744000 | 1.49854500  |
| H  | 5.48072200  | 0.30827800  | 2.37221000  |
| C  | 5.82801200  | 1.74825800  | -0.13205100 |
| C  | 5.34774200  | -0.15459600 | -1.52801400 |
| H  | 5.36004200  | 0.30231600  | -2.52150100 |
| C  | 4.05818400  | 0.32160900  | -0.77626400 |
| H  | 3.48659300  | 1.05417500  | -1.34139900 |
| H  | 3.85645300  | 1.61457700  | 0.95600100  |
| C  | 3.42460700  | -2.10060800 | -0.72656500 |
| C  | 4.82985700  | -2.50450800 | -1.01132100 |
| C  | 1.79872500  | -0.70747500 | -0.27509300 |
| H  | 4.82741900  | -3.44388300 | -1.56656700 |
| N  | 3.11232400  | -0.77743500 | -0.54773900 |
| O  | 5.47900900  | -1.54513000 | -1.81740200 |
| H  | 5.34672000  | -2.67394400 | -0.05929800 |
| N  | 2.38080100  | -2.86379000 | -0.59306100 |
| N  | 1.38065600  | -1.97684900 | -0.30709400 |
| C  | 0.03358000  | -2.39855400 | -0.15252200 |
| C  | -0.43092000 | -2.84708400 | 1.08394300  |
| C  | -0.85657800 | -2.30228200 | -1.22407300 |
| C  | -1.76587000 | -3.18103100 | 1.26051600  |
| C  | -2.19593100 | -2.62662100 | -1.07174900 |
| C  | -2.62728500 | -3.05727200 | 0.17578000  |
| H  | -2.12497100 | -3.52088900 | 2.22399000  |
| H  | -2.88824200 | -2.50073000 | -1.89422400 |
| Cl | -0.28917000 | -1.75016800 | -2.76185200 |
| Cl | -4.30666900 | -3.44627300 | 0.39297800  |
| Cl | 0.66238700  | -2.95923600 | 2.42105500  |
| C  | 7.78969700  | 0.58944500  | -1.45245600 |

|   |             |             |             |
|---|-------------|-------------|-------------|
| H | 7.65628800  | 1.24586800  | -2.31912000 |
| H | 8.58276800  | 1.00620800  | -0.82399200 |
| H | 8.12452800  | -0.38672600 | -1.81713600 |
| C | 6.65955800  | 2.49420500  | 0.91644200  |
| H | 7.60323800  | 2.83545700  | 0.47825700  |
| H | 6.11173800  | 3.38169000  | 1.24860900  |
| H | 6.89428600  | 1.90128100  | 1.80154300  |
| C | 5.46322000  | 2.77636300  | -1.21322200 |
| H | 4.75951400  | 3.50841000  | -0.80451000 |
| H | 6.36152900  | 3.31779900  | -1.52636600 |
| H | 5.01217500  | 2.35441200  | -2.11330200 |
| N | -2.68109400 | 2.91401400  | -0.01164400 |
| C | -2.59327000 | 3.68197100  | 1.27462000  |
| H | -3.62262800 | 3.89716200  | 1.57511700  |
| H | -2.17665700 | 2.97648100  | 2.00095600  |
| C | -1.74631000 | 4.94356700  | 1.24704800  |
| H | -1.79190000 | 5.39737700  | 2.23980300  |
| H | -0.69947100 | 4.71564000  | 1.03631000  |
| H | -2.10243800 | 5.67878600  | 0.52420400  |
| C | -1.36428200 | 2.68785600  | -0.71098400 |
| H | -1.50258600 | 1.73686400  | -1.23038900 |
| H | -0.60548900 | 2.54763100  | 0.06308300  |
| C | -0.91496500 | 3.75639500  | -1.69211400 |
| H | -0.83178000 | 4.75063700  | -1.24950700 |
| H | 0.08197800  | 3.45033800  | -2.01967100 |
| H | -1.56270000 | 3.80957500  | -2.57077300 |
| C | -3.81557700 | 3.30172200  | -0.91681900 |
| H | -4.71534400 | 2.89873600  | -0.43997600 |
| H | -3.66093600 | 2.72847800  | -1.83423800 |
| C | -3.98990900 | 4.78896900  | -1.17184300 |
| H | -3.10813400 | 5.24785000  | -1.62039300 |
| H | -4.82342600 | 4.91286700  | -1.86706000 |
| H | -4.24415200 | 5.33027400  | -0.25735200 |
| H | 0.08320900  | 0.36837400  | -0.72323900 |
| H | -2.97461700 | 1.93940500  | 0.30874200  |

**Re-M04<sup>B</sup>**

Total Energy= -3452.08081311

Sum of electronic and zero-point Energies= -3451.261857

Sum of electronic and thermal Energies= -3451.213762

Sum of electronic and thermal Enthalpies= -3451.212818

Sum of electronic and thermal Free Energies= -3451.345242

|   |            |             |            |
|---|------------|-------------|------------|
| C | 0.45921700 | -1.27627700 | 3.32645100 |
| C | 0.24948100 | -0.40479500 | 2.25867400 |

|   |             |             |             |
|---|-------------|-------------|-------------|
| C | 1.28101100  | -0.15442200 | 1.34443600  |
| C | 2.53240900  | -0.73236000 | 1.53907500  |
| C | 2.75509500  | -1.58639000 | 2.61634400  |
| C | 1.70945000  | -1.86428300 | 3.49601700  |
| H | -0.36233400 | -1.48084700 | 4.00406100  |
| H | 3.32044500  | -0.52133800 | 0.82039800  |
| H | 3.72981600  | -2.04155000 | 2.75794900  |
| H | 1.86987800  | -2.53986000 | 4.33075500  |
| C | 1.00578200  | 0.73597200  | 0.14070900  |
| O | 2.16619100  | 1.18250500  | -0.49494400 |
| O | -0.90210400 | 0.29428200  | 2.07562500  |
| C | -2.12707300 | -0.33824800 | 2.38448200  |
| H | -2.61492400 | 0.01236100  | 3.28313300  |
| C | -2.60619800 | -1.25135600 | 1.47713500  |
| O | -2.02110400 | -1.57751100 | 0.38956200  |
| C | -3.96167200 | -1.84869100 | 1.76597000  |
| C | -4.46038100 | -2.04568700 | 3.05844000  |
| C | -4.75339800 | -2.22700400 | 0.67592800  |
| C | -5.73092300 | -2.58103000 | 3.25584900  |
| H | -3.83879500 | -1.79678600 | 3.91373900  |
| C | -6.02536500 | -2.75777700 | 0.87148700  |
| H | -4.34343200 | -2.08408900 | -0.32056000 |
| C | -6.52035900 | -2.93577200 | 2.16281400  |
| H | -6.10215300 | -2.73308700 | 4.26521000  |
| H | -6.63268400 | -3.03761900 | 0.01533600  |
| H | -7.50905700 | -3.35720900 | 2.31694000  |
| C | -3.63329500 | 2.27858700  | -2.98162000 |
| C | -4.15347800 | 1.96350500  | -1.56796900 |
| C | -1.98745000 | 2.55288800  | -1.21523100 |
| C | -2.13058500 | 2.60623400  | -2.75052400 |
| H | -3.81274100 | 1.45053000  | -3.66925500 |
| H | -4.16862200 | 3.13927300  | -3.39168000 |
| H | -1.45401600 | 1.89985500  | -3.24329400 |
| H | -1.87023700 | 3.59570800  | -3.13213300 |
| C | -3.38242600 | 3.01701000  | -0.70899100 |
| C | -3.48373700 | 0.64101900  | -1.11301000 |
| H | -3.94847500 | 0.26969500  | -0.19519700 |
| C | -2.02302500 | 1.08748700  | -0.76102300 |
| H | -1.87863800 | 0.99380900  | 0.31257400  |
| H | -1.13441500 | 3.11267300  | -0.81833900 |
| C | -1.29776200 | -0.74668900 | -2.27922000 |
| C | -2.63398800 | -0.77977000 | -2.93401600 |
| C | 0.22205000  | -0.02864100 | -0.90420100 |
| H | -2.83276700 | -1.79652600 | -3.27633300 |

|    |             |             |             |
|----|-------------|-------------|-------------|
| N  | -1.01425700 | 0.20812000  | -1.34778700 |
| O  | -3.65946200 | -0.43154700 | -2.03342000 |
| H  | -2.61301500 | -0.12135700 | -3.81246400 |
| N  | -0.28215400 | -1.53370000 | -2.48220300 |
| N  | 0.66346800  | -1.06256400 | -1.62044200 |
| C  | 1.92715900  | -1.70741600 | -1.53100100 |
| C  | 3.01135700  | -1.25331700 | -2.28297800 |
| C  | 2.07280800  | -2.82286900 | -0.70335800 |
| C  | 4.25274800  | -1.86467400 | -2.16786600 |
| C  | 3.30623500  | -3.45072300 | -0.57987900 |
| C  | 4.37909400  | -2.95028200 | -1.30675600 |
| H  | 5.09651200  | -1.50962200 | -2.74626900 |
| H  | 3.42232100  | -4.30432500 | 0.07638200  |
| Cl | 0.71697300  | -3.39334000 | 0.18921600  |
| Cl | 5.93040500  | -3.71409400 | -1.14722600 |
| Cl | 2.80569000  | 0.04969500  | -3.39910500 |
| C  | -5.66349700 | 1.92619300  | -1.44386200 |
| H  | -5.96961300 | 1.74599000  | -0.40801700 |
| H  | -6.11080800 | 2.86722300  | -1.77889300 |
| H  | -6.07207300 | 1.11849500  | -2.05949400 |
| C  | -3.69031200 | 4.47291600  | -1.07019800 |
| H  | -4.74134300 | 4.69987200  | -0.86432500 |
| H  | -3.08304900 | 5.13883300  | -0.44872000 |
| H  | -3.49070900 | 4.72103300  | -2.11372300 |
| C  | -3.59671300 | 2.87639800  | 0.80602400  |
| H  | -2.85687400 | 3.48065500  | 1.34255700  |
| H  | -4.58705800 | 3.25957500  | 1.07232800  |
| H  | -3.52557600 | 1.85463000  | 1.18886900  |
| N  | 3.38365100  | 2.85317100  | 1.17746100  |
| C  | 2.45215500  | 3.07928400  | 2.29226500  |
| H  | 1.62966600  | 3.68896800  | 1.89927900  |
| H  | 2.02250100  | 2.10503000  | 2.56096100  |
| C  | 3.01466400  | 3.71299700  | 3.56561200  |
| H  | 2.20461200  | 3.84599800  | 4.28794300  |
| H  | 3.76183200  | 3.06214200  | 4.02821200  |
| H  | 3.47267200  | 4.68736300  | 3.38325600  |
| C  | 4.62516500  | 2.14549400  | 1.51904200  |
| H  | 4.91487600  | 1.55533500  | 0.63853500  |
| H  | 4.36973300  | 1.42363700  | 2.30345300  |
| C  | 5.82608500  | 2.99079200  | 1.94578500  |
| H  | 5.60658500  | 3.61541000  | 2.81424900  |
| H  | 6.65855400  | 2.32981400  | 2.20246200  |
| H  | 6.16088500  | 3.63909800  | 1.13115100  |
| C  | 3.52028600  | 3.96361900  | 0.22396700  |

|   |            |            |             |
|---|------------|------------|-------------|
| H | 2.59025300 | 4.00261200 | -0.35844500 |
| H | 4.31136400 | 3.67891100 | -0.47909200 |
| C | 3.79481600 | 5.35801000 | 0.78762000  |
| H | 4.70719700 | 5.39394500 | 1.38682100  |
| H | 3.90266500 | 6.06427100 | -0.04029600 |
| H | 2.96225300 | 5.70351400 | 1.40668000  |
| H | 0.35614200 | 1.56476700 | 0.45737000  |
| H | 2.64479000 | 1.78812800 | 0.16854100  |

**Re-M5**

Total Energy= -3159.76642678

Sum of electronic and zero-point Energies= -3159.158406

Sum of electronic and thermal Energies= -3159.120220

Sum of electronic and thermal Enthalpies= -3159.119275

Sum of electronic and thermal Free Energies= -3159.231524

|   |             |             |             |
|---|-------------|-------------|-------------|
| C | -1.29411500 | 3.38246100  | 2.04073500  |
| C | -0.66218200 | 2.59126300  | 1.08053200  |
| C | -0.42909000 | 1.23502800  | 1.34904200  |
| C | -0.75683400 | 0.71028300  | 2.60098800  |
| C | -1.37760800 | 1.50139000  | 3.56058200  |
| C | -1.66038500 | 2.83687100  | 3.26446800  |
| H | -1.46393200 | 4.42776200  | 1.80798000  |
| H | -0.55108900 | -0.33865600 | 2.80919100  |
| H | -1.64083400 | 1.08397400  | 4.52612200  |
| H | -2.14944700 | 3.46318900  | 4.00379700  |
| C | 0.14415400  | 0.36465100  | 0.25340500  |
| O | 1.52574400  | 0.15530800  | 0.35608200  |
| H | -0.10507400 | 0.83415400  | -0.71179400 |
| O | -0.36139100 | 3.14530300  | -0.12495000 |
| C | 0.99158800  | 2.98897600  | -0.55337600 |
| H | 1.06279200  | 2.73409400  | -1.60294000 |
| C | 1.97608400  | 3.64769100  | 0.17196800  |
| O | 1.79408700  | 4.25514000  | 1.26191200  |
| C | 3.38566700  | 3.57955800  | -0.38830300 |
| C | 3.80643000  | 2.67556900  | -1.37231900 |
| C | 4.31630800  | 4.49109500  | 0.11761600  |
| C | 5.11343800  | 2.70209300  | -1.85137800 |
| H | 3.11521800  | 1.92914700  | -1.75499900 |
| C | 5.62373900  | 4.52029800  | -0.35818400 |
| H | 3.98047100  | 5.16873600  | 0.89551200  |
| C | 6.02737300  | 3.62767100  | -1.34906600 |
| H | 5.42338400  | 1.99132700  | -2.61186200 |
| H | 6.33132200  | 5.23897400  | 0.04501200  |
| H | 7.04719600  | 3.64526300  | -1.72080900 |

|    |             |             |             |
|----|-------------|-------------|-------------|
| C  | -4.66496600 | -0.68922200 | -2.19118400 |
| C  | -5.15329900 | -0.11372700 | -0.84952200 |
| C  | -3.05534200 | 0.74483500  | -1.07069300 |
| C  | -3.20749200 | -0.15837500 | -2.31254700 |
| H  | -4.75522300 | -1.77571300 | -2.22241500 |
| H  | -5.29165900 | -0.31154100 | -3.00295100 |
| H  | -2.45899400 | -0.95841800 | -2.34055400 |
| H  | -3.06471400 | 0.41975200  | -3.22718700 |
| C  | -4.49087700 | 1.30377000  | -0.86009600 |
| C  | -4.35813300 | -0.80538500 | 0.28447900  |
| H  | -4.78740900 | -0.51525500 | 1.24639400  |
| C  | -2.93824600 | -0.15276200 | 0.17307400  |
| H  | -2.73535900 | 0.44302100  | 1.06111100  |
| H  | -2.27022000 | 1.50560400  | -1.13474900 |
| C  | -2.07642900 | -2.49509700 | -0.06933100 |
| C  | -3.45220000 | -3.02003900 | -0.30790100 |
| C  | -0.54047100 | -0.96853700 | 0.19461300  |
| H  | -3.53134700 | -4.02409600 | 0.11199900  |
| N  | -1.86874500 | -1.15598300 | 0.11165600  |
| O  | -4.42789500 | -2.22601700 | 0.32589700  |
| H  | -3.60208900 | -3.09336700 | -1.39154200 |
| N  | -0.95349700 | -3.15052700 | -0.08558200 |
| N  | -0.00381600 | -2.18182500 | 0.07907600  |
| C  | 1.36877700  | -2.56571600 | 0.04703400  |
| C  | 2.12486300  | -2.36408200 | -1.10671500 |
| C  | 1.94217700  | -3.18721600 | 1.15286300  |
| C  | 3.44522100  | -2.78182000 | -1.16601400 |
| C  | 3.26225300  | -3.61754900 | 1.11396200  |
| C  | 3.99171800  | -3.40872300 | -0.05009200 |
| H  | 4.03386900  | -2.61872300 | -2.06020300 |
| H  | 3.70860100  | -4.09833300 | 1.97537200  |
| Cl | 1.00915500  | -3.40480200 | 2.59378600  |
| Cl | 5.64093400  | -3.94205500 | -0.11307500 |
| Cl | 1.41343500  | -1.55983600 | -2.46236900 |
| C  | -6.65285200 | -0.18969500 | -0.64139600 |
| H  | -6.94802800 | 0.27818900  | 0.30372400  |
| H  | -7.18599100 | 0.31054600  | -1.45511100 |
| H  | -6.97792100 | -1.23440900 | -0.61580000 |
| C  | -4.95008900 | 2.20031100  | -2.01392300 |
| H  | -6.01233000 | 2.43986700  | -1.90316200 |
| H  | -4.39466000 | 3.14266600  | -1.98565500 |
| H  | -4.80558700 | 1.76017700  | -3.00120500 |
| C  | -4.67023600 | 2.12008800  | 0.42850600  |
| H  | -3.99744700 | 2.98387300  | 0.41364300  |

|   |             |            |            |
|---|-------------|------------|------------|
| H | -5.69513200 | 2.49907000 | 0.48549100 |
| H | -4.47609900 | 1.57604200 | 1.35563800 |
| H | 1.88222200  | 1.05158100 | 0.17158100 |

**TS6RR**

Total Energy= -3159.71537157

Sum of electronic and zero-point Energies= -3159.110078

Sum of electronic and thermal Energies= -3159.071902

Sum of electronic and thermal Enthalpies= -3159.070957

Sum of electronic and thermal Free Energies= -3159.181902

|   |             |             |             |
|---|-------------|-------------|-------------|
| C | -1.95722600 | 3.84485300  | 1.43750700  |
| C | -1.01992400 | 3.10812000  | 0.70951100  |
| C | -0.62963900 | 1.83157200  | 1.14397000  |
| C | -1.11526900 | 1.36663300  | 2.36911400  |
| C | -2.02714500 | 2.10503800  | 3.11373200  |
| C | -2.45826600 | 3.34169500  | 2.63071600  |
| H | -2.24830700 | 4.82027300  | 1.06412800  |
| H | -0.77778100 | 0.39325800  | 2.71574800  |
| H | -2.39737000 | 1.72148500  | 4.05777100  |
| H | -3.17685000 | 3.92666800  | 3.19623900  |
| C | 0.36059200  | 1.03720900  | 0.36642100  |
| O | 1.52226800  | 0.84421400  | 1.00556000  |
| H | 0.27624900  | 0.81490700  | -0.68462300 |
| O | -0.51703700 | 3.65552900  | -0.41908800 |
| C | 0.66032900  | 3.04180900  | -0.87613900 |
| H | 0.58213300  | 2.66237200  | -1.88630500 |
| C | 1.86727600  | 3.35339000  | -0.23703800 |
| O | 1.96444600  | 3.98639500  | 0.83546600  |
| C | 3.09224900  | 2.65281100  | -0.79040200 |
| C | 3.23191800  | 2.23577700  | -2.12017300 |
| C | 4.13239900  | 2.38668500  | 0.10886900  |
| C | 4.38569600  | 1.57558000  | -2.53776000 |
| H | 2.45365300  | 2.44910400  | -2.84621600 |
| C | 5.28148100  | 1.71817600  | -0.30396700 |
| H | 4.01008700  | 2.72734900  | 1.13193400  |
| C | 5.41320900  | 1.31412800  | -1.63190100 |
| H | 4.48503700  | 1.27061500  | -3.57526200 |
| H | 6.07682500  | 1.51515600  | 0.40678300  |
| H | 6.31172500  | 0.79926900  | -1.95920900 |
| C | -4.56511700 | -1.19573000 | -2.12682200 |
| C | -5.15210100 | -0.84213300 | -0.75056400 |
| C | -3.22976400 | 0.36750700  | -0.82788600 |
| C | -3.20681100 | -0.43847600 | -2.14517100 |
| H | -4.48668200 | -2.27405000 | -2.27111800 |

|    |             |             |             |
|----|-------------|-------------|-------------|
| H  | -5.23180900 | -0.83268200 | -2.91346700 |
| H  | -2.34208400 | -1.10857400 | -2.19861800 |
| H  | -3.12952400 | 0.22838900  | -3.00616200 |
| C  | -4.74108800 | 0.66139000  | -0.61877700 |
| C  | -4.25472300 | -1.49896100 | 0.33291500  |
| H  | -4.75122100 | -1.42012500 | 1.30383900  |
| C  | -2.97742700 | -0.59212100 | 0.34672200  |
| H  | -2.91996400 | -0.03255000 | 1.27986900  |
| H  | -2.57406600 | 1.24347000  | -0.81374800 |
| C  | -1.68504600 | -2.67218300 | -0.13053900 |
| C  | -2.92960100 | -3.40547900 | -0.50325100 |
| C  | -0.49216800 | -0.90905800 | 0.52236000  |
| H  | -2.82982000 | -4.45611300 | -0.22466900 |
| N  | -1.74354800 | -1.36209700 | 0.26556100  |
| O  | -4.05177000 | -2.90226000 | 0.19291100  |
| H  | -3.05400900 | -3.35604000 | -1.59100900 |
| N  | -0.45873400 | -3.10078600 | -0.15723100 |
| N  | 0.25047300  | -1.99062200 | 0.24145700  |
| C  | 1.66755800  | -2.01591500 | 0.23884200  |
| C  | 2.36889600  | -1.63147700 | -0.90809400 |
| C  | 2.38245100  | -2.35458400 | 1.38762900  |
| C  | 3.75602000  | -1.56923100 | -0.91526600 |
| C  | 3.77108500  | -2.30870300 | 1.40463300  |
| C  | 4.43573200  | -1.91073100 | 0.25031000  |
| H  | 4.29048000  | -1.25285100 | -1.80243000 |
| H  | 4.31868900  | -2.56694800 | 2.30237800  |
| Cl | 1.52370300  | -2.80758600 | 2.81778900  |
| Cl | 6.16886800  | -1.84129800 | 0.25965600  |
| Cl | 1.49142300  | -1.18963300 | -2.33844300 |
| C  | -6.61839300 | -1.18856900 | -0.58524000 |
| H  | -6.99822300 | -0.85474200 | 0.38623500  |
| H  | -7.22295500 | -0.72358900 | -1.36990400 |
| H  | -6.75974600 | -2.27223100 | -0.64795100 |
| C  | -5.32272600 | 1.57595800  | -1.70113200 |
| H  | -6.41550700 | 1.59202600  | -1.63660400 |
| H  | -4.96834500 | 2.59882000  | -1.53847900 |
| H  | -5.04845700 | 1.29064100  | -2.71740400 |
| C  | -5.08541600 | 1.30664800  | 0.73173600  |
| H  | -4.52488900 | 2.24040900  | 0.84957600  |
| H  | -6.15199900 | 1.55046500  | 0.76225400  |
| H  | -4.87200400 | 0.68650500  | 1.60522700  |
| H  | 2.23400900  | 0.62785300  | 0.38167800  |

**M6RR**



Total Energy= -3159.79748026

Sum of electronic and zero-point Energies= -3159.189591

Sum of electronic and thermal Energies= -3159.150824

Sum of electronic and thermal Enthalpies= -3159.149880

Sum of electronic and thermal Free Energies= -3159.264644

|   |             |             |             |
|---|-------------|-------------|-------------|
| C | -2.65815300 | 3.66516700  | 2.25377700  |
| C | -1.55932000 | 3.26546600  | 1.50338700  |
| C | -0.93986300 | 2.03601600  | 1.69475400  |
| C | -1.40468200 | 1.15657500  | 2.66445500  |
| C | -2.51277900 | 1.53187100  | 3.42743300  |
| C | -3.12189200 | 2.77315100  | 3.22208200  |
| H | -3.12191300 | 4.63170600  | 2.09400800  |
| H | -0.91210300 | 0.19870100  | 2.80243400  |
| H | -2.89981100 | 0.86150500  | 4.18723600  |
| H | -3.97932000 | 3.05294200  | 3.82610200  |
| C | 0.27012800  | 1.95662400  | 0.80376200  |
| O | 1.48686100  | 1.86429400  | 1.51858400  |
| H | 0.24894400  | 1.07352300  | 0.16045600  |
| O | -0.98072300 | 4.01804600  | 0.52748700  |
| C | 0.11812000  | 3.28194400  | -0.02091800 |
| H | -0.11503700 | 3.06925300  | -1.06973300 |
| C | 1.38679000  | 4.13145100  | 0.07966200  |
| O | 1.42887700  | 5.07354600  | 0.84247700  |
| C | 2.54974100  | 3.76174100  | -0.77785300 |
| C | 2.60555500  | 2.55206400  | -1.47507800 |
| C | 3.61713000  | 4.66067800  | -0.86019500 |
| C | 3.71978300  | 2.24717400  | -2.25052500 |
| H | 1.79513900  | 1.83242900  | -1.40508200 |
| C | 4.72486800  | 4.35933000  | -1.64237800 |
| H | 3.55804400  | 5.59070100  | -0.30440200 |
| C | 4.77625600  | 3.15148100  | -2.33810500 |
| H | 3.76258300  | 1.30359300  | -2.78475600 |
| H | 5.54896000  | 5.06174000  | -1.70991200 |
| H | 5.64238900  | 2.91335100  | -2.94721100 |
| C | -4.02425000 | -1.19324100 | -2.53655600 |
| C | -4.76633300 | -1.02557400 | -1.19964000 |
| C | -2.83387900 | 0.12154300  | -0.87541400 |
| C | -2.66734500 | -0.47320200 | -2.28993100 |
| H | -3.93426400 | -2.24272600 | -2.81915200 |
| H | -4.59081200 | -0.70991800 | -3.33738400 |
| H | -1.80618200 | -1.14655800 | -2.34946500 |
| H | -2.49210100 | 0.31467600  | -3.02556200 |
| C | -4.35304500 | 0.42878300  | -0.79809500 |
| C | -4.00996900 | -1.86137300 | -0.13116100 |

|    |             |             |             |
|----|-------------|-------------|-------------|
| H  | -4.61551900 | -1.90399300 | 0.77839700  |
| C  | -2.72435000 | -1.01546100 | 0.15471000  |
| H  | -2.75427800 | -0.60193600 | 1.16370500  |
| H  | -2.16996200 | 0.96189400  | -0.64815900 |
| C  | -1.42681300 | -3.03838300 | -0.49349400 |
| C  | -2.63719600 | -3.68694700 | -1.07661600 |
| C  | -0.27505600 | -1.36926000 | 0.49090600  |
| H  | -2.58759300 | -4.76587800 | -0.91715300 |
| N  | -1.50458900 | -1.79701700 | 0.07493100  |
| O  | -3.82428400 | -3.23804600 | -0.45147000 |
| H  | -2.64612000 | -3.50964300 | -2.15863400 |
| N  | -0.20556900 | -3.47986800 | -0.48128900 |
| N  | 0.46735700  | -2.43540000 | 0.12484700  |
| C  | 1.87694600  | -2.49041000 | 0.22015300  |
| C  | 2.67053700  | -1.85675100 | -0.73900400 |
| C  | 2.50878100  | -3.16896500 | 1.26301200  |
| C  | 4.05653700  | -1.87557500 | -0.66223400 |
| C  | 3.89385900  | -3.21214200 | 1.36285200  |
| C  | 4.64647100  | -2.55872100 | 0.39485400  |
| H  | 4.65802900  | -1.37303600 | -1.40963800 |
| H  | 4.37146800  | -3.73796400 | 2.18016600  |
| Cl | 1.54818700  | -3.95978400 | 2.46827400  |
| Cl | 6.38051600  | -2.59701500 | 0.50743700  |
| Cl | 1.90906900  | -1.03450300 | -2.06315400 |
| C  | -6.24705800 | -1.34298700 | -1.25504500 |
| H  | -6.72977200 | -1.14451100 | -0.29213300 |
| H  | -6.74941200 | -0.74500200 | -2.02164800 |
| H  | -6.39998300 | -2.39964200 | -1.49666100 |
| C  | -4.79528000 | 1.50920600  | -1.78950400 |
| H  | -5.88821100 | 1.56091400  | -1.83336000 |
| H  | -4.43312100 | 2.48413900  | -1.44668600 |
| H  | -4.42396200 | 1.35780500  | -2.80368600 |
| C  | -4.84269700 | 0.87891400  | 0.58542300  |
| H  | -4.29655300 | 1.77585300  | 0.89683400  |
| H  | -5.90620400 | 1.13491200  | 0.53683800  |
| H  | -4.72548700 | 0.13705200  | 1.37818900  |
| H  | 1.43454900  | 2.45842300  | 2.27967500  |

### **P2RR**

Total Energy= -804.17513686

Sum of electronic and zero-point Energies= -803.936380

Sum of electronic and thermal Energies= -803.922380

Sum of electronic and thermal Enthalpies= -803.921436

Sum of electronic and thermal Free Energies= -803.978155

|   |             |             |             |
|---|-------------|-------------|-------------|
| C | 2.48942800  | -1.37812900 | -1.20834900 |
| C | 1.76156100  | -0.26421200 | -0.81316400 |
| C | 2.14020000  | 0.52669100  | 0.26482000  |
| C | 3.27581500  | 0.21284700  | 0.99777400  |
| C | 4.03072300  | -0.89712000 | 0.61731300  |
| C | 3.63592800  | -1.67781200 | -0.47235300 |
| H | 2.17301000  | -1.98118900 | -2.05133900 |
| H | 3.56527800  | 0.81939400  | 1.85025600  |
| H | 4.92574700  | -1.15880900 | 1.17064400  |
| H | 4.23184400  | -2.53963300 | -0.75520100 |
| C | 1.11068600  | 1.60428300  | 0.46548300  |
| O | 0.42234000  | 1.37391800  | 1.68133800  |
| O | 0.61020400  | 0.15577700  | -1.41468200 |
| C | 0.22200500  | 1.39244300  | -0.80409200 |
| H | -0.07587700 | 2.17087500  | 1.90513300  |
| H | 1.54063900  | 2.61085300  | 0.45671400  |
| C | -1.26115600 | 1.43266600  | -0.44847300 |
| O | -1.79753200 | 2.52459100  | -0.42296400 |
| H | 0.39421500  | 2.19758400  | -1.52447100 |
| C | -2.01150500 | 0.18723400  | -0.12816300 |
| C | -3.39361600 | 0.19345100  | -0.34001600 |
| C | -1.39314400 | -0.94235500 | 0.41696300  |
| C | -4.15202500 | -0.92942400 | -0.03195500 |
| H | -3.85540400 | 1.08557100  | -0.75074000 |
| C | -2.15872000 | -2.05737100 | 0.74156000  |
| H | -0.32853800 | -0.93623600 | 0.62427700  |
| C | -3.53319400 | -2.05562400 | 0.50917300  |
| H | -5.22251600 | -0.92699800 | -0.20805600 |
| H | -1.68261500 | -2.92901400 | 1.17799800  |
| H | -4.12381300 | -2.93208200 | 0.75612300  |
